# Supplementary material for: Vinclozolin induced epigenetic transgenerational inheritance of pathologies and sperm epimutation biomarkers for specific diseases
Source: PubMed Central journal article supplement (PMC6114855; doi:10.1371/journal.pone.0202662), 2018-08-29

# Supplemental Figure S1

A

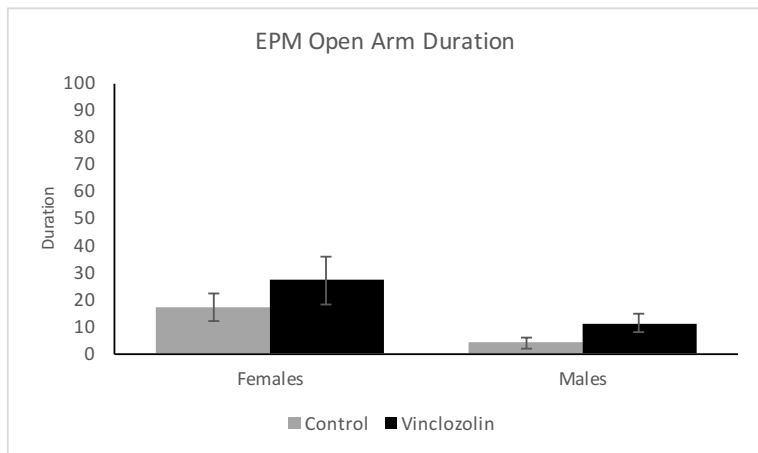

B

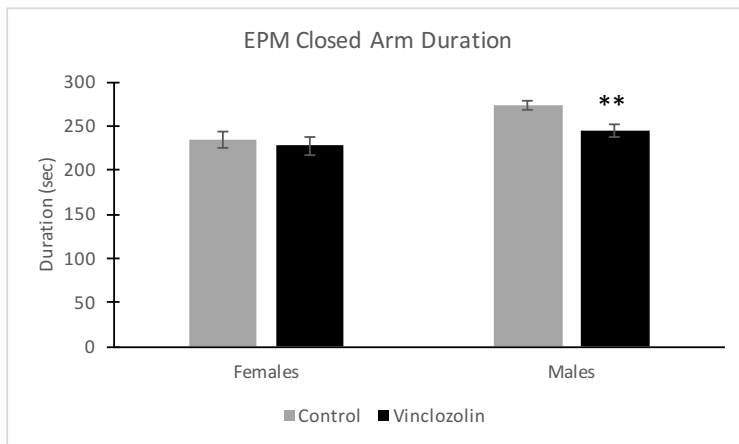

C

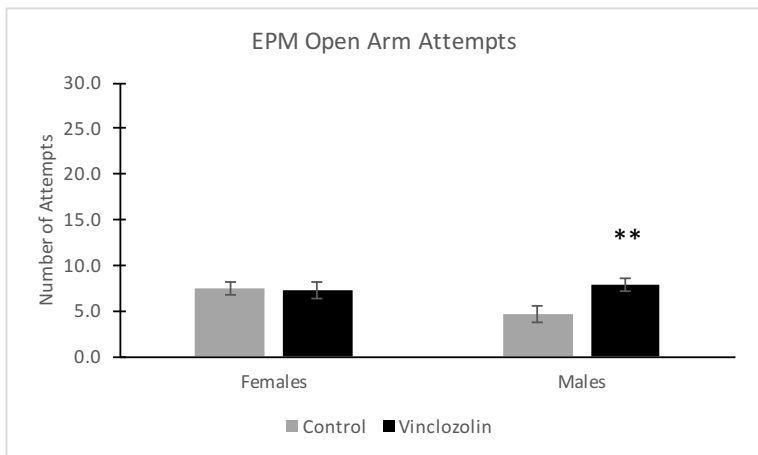

D

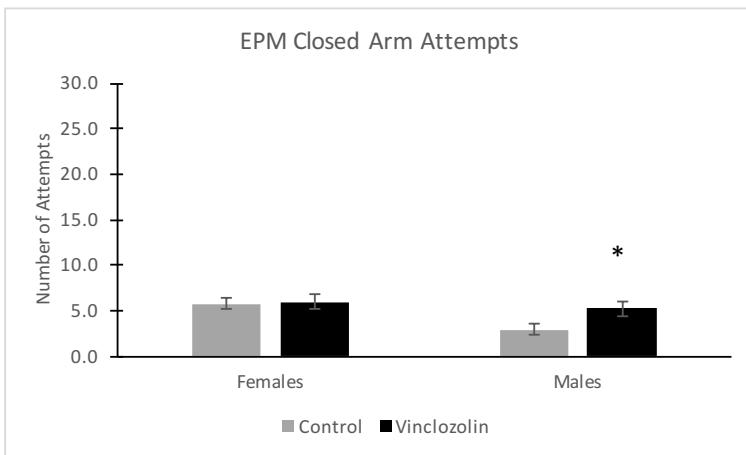

E

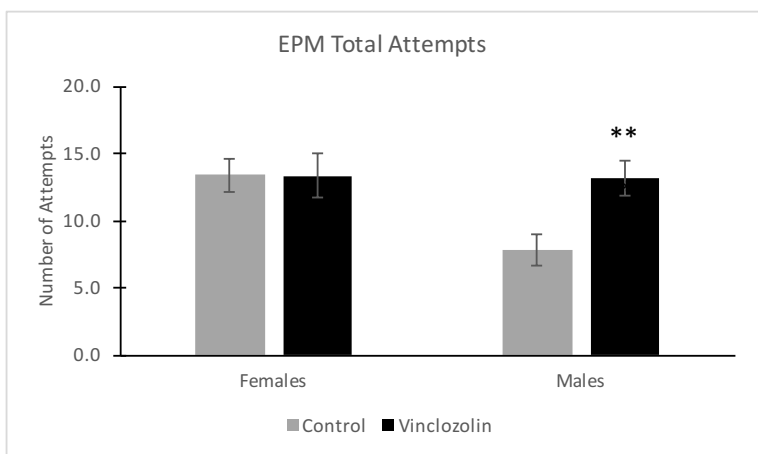

F

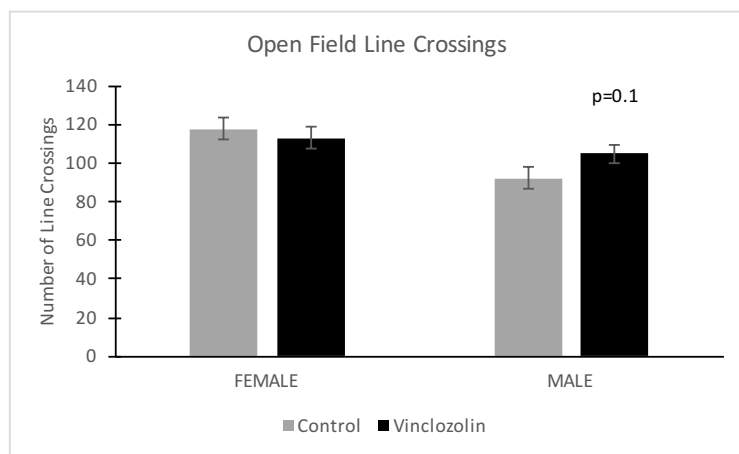

Supplement: pone.0202662.s001.pdf [file pone.0202662.s001.pdf]
