# Supplementary material for: Vinclozolin induced epigenetic transgenerational inheritance of pathologies and sperm epimutation biomarkers for specific diseases
Source: PubMed Central journal article supplement (PMC6114855; doi:10.1371/journal.pone.0202662), 2018-08-29
Supplement: pone.0202662.s002.pdf [file pone.0202662.s002.pdf]

Supplemental Table S1

| F1 Control Males  |           |           |           |           |           |           |           |           |                  |               |
|-------------------|-----------|-----------|-----------|-----------|-----------|-----------|-----------|-----------|------------------|---------------|
| Rat ID            | Puberty   |           | Testis    | Prostate  | Kidney    | Tumor     | Lean      | Obese     | Multiple Disease | Total Disease |
|                   | Early     | Late      |           |           |           |           |           |           |                  |               |
| 14C10-1-10-7      | -         | -         | -         | -         | -         | -         | -         | +         | -                | 1             |
| 14C10-1-10-8      | -         | -         | -         | -         | -         | -         | -         | +         | -                | 1             |
| 14C10-1-10-9      | -         | -         | +         | -         | -         | -         | -         | +         | +                | 2             |
| 14C10-1-10-10     | -         | -         | -         | -         | -         | -         | -         | -         | -                |               |
| 14C12-1-3-5       | -         | -         |           |           |           |           |           | +         | -                | 1             |
| 14C16-1-6-6       | -         | -         |           |           |           |           |           | -         | -                |               |
| 14C17-1-17-4      | -         | -         |           |           |           |           |           | -         | -                |               |
| 14C17-1-17-5      | -         | -         |           |           |           |           |           | -         | -                |               |
| 14C18-1-18-3      | -         | -         |           |           |           |           |           | -         | -                |               |
| 14C19-1-19-8      | -         | -         |           |           |           |           |           | -         | -                |               |
| 14C19-1-19-9      | -         | -         |           |           |           |           |           | -         | -                |               |
| 14C19-1-19-10     | -         | -         |           |           |           |           | +         | -         | -                | 1             |
| 14C19-1-19-11     | -         | -         |           |           |           |           |           | -         | -                |               |
| 14C20-1-20-4      |           |           |           |           |           |           |           | -         | -                |               |
| 14C20-1-20-5      |           |           |           |           |           |           |           | -         | -                |               |
| 14C20-1-20-6      |           |           |           |           |           |           |           | -         | -                |               |
| AC2-1-2-1         | +         | -         | +         | -         | +         | -         | -         | -         | +                | 3             |
| AC2-1-2-2         | -         | -         | -         | -         | -         | -         | -         | -         | -                |               |
| AC2-1-2-3         | -         | -         | -         | -         | +         | -         | -         | -         | -                | 1             |
| AC2-1-2-4         | -         | -         | -         | -         | -         | -         | -         | -         | -                |               |
| AC2-1-2-5         | -         | -         | -         | -         | -         | -         | -         | -         | -                |               |
| AC3-1-3-1         |           |           |           |           |           |           |           | +         | -                | 1             |
| AC4-1-4-1         | -         | -         |           |           |           |           |           | +         | -                | 1             |
| AC4-1-4-2         | -         | -         |           |           |           |           |           | -         | -                |               |
| AC4-1-4-3         | -         | -         | -         |           |           |           |           | -         | -                |               |
| AC4-1-4-4         | -         | -         |           |           |           |           |           | -         | -                |               |
| AC6-1-6-1         | -         | -         | -         | -         | -         | -         | -         | -         | -                |               |
| AC6-1-6-2         | -         | -         |           | +         | +         | -         | -         | -         | +                | 2             |
| AC6-1-6-3         | -         | -         | -         | -         | -         | -         | -         | +         | -                | 1             |
| AC6-1-6-4         | -         | -         | -         | +         | +         | -         | +         | -         | +                | 3             |
| AC9-1-4-7         | -         | -         | -         | -         | -         | -         | -         | -         | -                |               |
| AC9-1-4-8         | -         | -         | -         |           |           |           |           | -         | -                |               |
| AC9-1-4-9         | -         | -         |           |           |           |           |           | -         | -                |               |
|                   |           |           |           |           |           |           |           |           |                  |               |
| <b>Affected</b>   | <b>1</b>  | <b>0</b>  | <b>2</b>  | <b>2</b>  | <b>4</b>  | <b>0</b>  | <b>1</b>  | <b>7</b>  | <b>4</b>         |               |
| <b>Population</b> | <b>29</b> | <b>29</b> | <b>15</b> | <b>13</b> | <b>15</b> | <b>33</b> | <b>32</b> | <b>32</b> | <b>33</b>        |               |

| F1 Vinclozolin Males |           |           |           |           |           |           |           |           |           |         |
|----------------------|-----------|-----------|-----------|-----------|-----------|-----------|-----------|-----------|-----------|---------|
|                      | Puberty   |           | Testis    | Prostate  | Kidney    | Tumor     | Lean      | Obese     | Multiple  | Total   |
| Rat ID               | Early     | Late      |           |           |           |           |           |           | Disease   | Disease |
| 14V10-1-10-10        | -         | -         |           |           |           | -         |           |           | -         |         |
| 14V10-1-10-11        | -         | -         |           |           |           | -         |           |           | -         |         |
| 14V10-1-10-9         | -         | -         |           |           |           | -         |           |           | -         |         |
| 14V11-1-11-1         |           |           |           |           |           | -         |           |           | -         |         |
| 14V11-1-11-4         | -         | -         | -         | -         | -         | -         | -         | +         | -         | 1       |
| 14V1-1-1-5           | -         | -         | -         | -         | +         | -         | +         | -         | +         | 2       |
| 14V16-1-16-9         |           |           |           |           |           | -         | -         | +         | -         | 1       |
| 14V2-1-2-8           | -         | -         | +         | -         | -         | -         | -         | -         | -         | 1       |
| 14V3-1-3-4           | -         | -         | -         | -         | +         | -         | -         | +         | +         | 2       |
| 14V4-1-4-1           | -         | -         |           |           |           | -         | -         | -         | -         |         |
| 14V4-1-4-2           | -         | -         |           | +         |           | -         | -         | -         | -         | 1       |
| 14V4-1-4-3           |           |           |           | -         |           |           |           |           |           |         |
| 14V5-1-5-8           | -         | -         |           |           |           | +         |           |           | -         | 1       |
| 14V5-1-5-9           | -         | -         | -         | -         | +         | -         |           |           | -         | 1       |
| 14V5-1-5-10          | -         | -         | -         | -         | -         | -         | -         | -         | -         |         |
| 14V6-1-6-4           | -         | -         |           |           |           | -         | +         | -         | -         | 1       |
| 14V6-1-6-5           | -         | -         |           |           |           | -         | -         | -         | -         |         |
| 14V6-1-6-6           | -         | -         | -         | -         | -         | -         | -         | +         | -         | 1       |
| 14V6-1-6-7           | -         | -         | +         | +         | -         | -         | -         | -         | +         | 2       |
| 14V6-1-6-8           | -         | -         | +         | -         | -         | -         | -         | -         | -         | 1       |
| 15T1-1-1-8           | -         | -         | +         | +         | +         | -         |           |           | +         | 3       |
| 15T2-1-2-9           | -         | -         | +         | -         | -         | -         |           |           | -         | 1       |
| 15T2-1-2-10          | -         | -         | -         | +         | -         | -         |           |           | -         | 1       |
| 15T6-1-6-7           | -         | -         | -         | -         | -         | -         |           |           | -         |         |
| 15T7-1-7-4           | -         | -         | -         | -         | +         | -         |           |           | -         | 1       |
| 15T7-1-7-5           | -         | -         | -         | -         | -         | -         |           |           | -         |         |
|                      |           |           |           |           |           |           |           |           |           |         |
| <b>Affected</b>      | <b>0</b>  | <b>0</b>  | <b>5</b>  | <b>4</b>  | <b>5</b>  | <b>1</b>  | <b>3</b>  | <b>4</b>  | <b>4</b>  |         |
| <b>Population</b>    | <b>24</b> | <b>24</b> | <b>15</b> | <b>16</b> | <b>17</b> | <b>25</b> | <b>13</b> | <b>13</b> | <b>25</b> |         |

| F1 Control Females |           |           |           |           |           |           |           |                  |               |
|--------------------|-----------|-----------|-----------|-----------|-----------|-----------|-----------|------------------|---------------|
|                    | Puberty   |           | Ovary     | Kidney    | Tumor     | Lean      | Obese     | Multiple Disease | Total Disease |
| Rat ID             | Early     | Late      |           |           |           |           |           |                  |               |
| 14C10-1-10-1       | -         | -         | -         | -         | -         | +         | -         | -                | 1             |
| 14C10-1-10-2       | -         | -         | -         | -         | -         | -         | +         | -                | 1             |
| 14C12-1-3-1        | -         | -         | -         | -         | -         | +         | -         | -                | 1             |
| 14C12-1-3-2        | -         | -         | -         | +         | -         | -         | -         | -                | 1             |
| 14C12-1-3-3        | -         | -         | -         | -         | -         | -         | -         | -                |               |
| 14C14-1-4-1        |           |           | +         | -         | -         | -         | -         | -                | 1             |
| 14C14-1-4-2        | -         | -         | -         | -         | -         | -         | -         | -                |               |
| 14C16-1-6-1        | -         | -         | -         | -         | -         | -         | -         | -                |               |
| 14C16-1-6-2        | -         | -         | -         | -         | -         | -         | -         | -                |               |
| 14C16-1-6-3        | -         | -         | +         | -         | -         | -         | -         | -                |               |
| 14C16-1-6-4        | -         | -         | -         | -         | -         | -         | +         | -                | 1             |
| 14C17-1-17-1       | -         | -         | -         | -         | -         | -         | -         | -                |               |
| 14C17-1-17-2       | -         | -         | -         | -         | -         | -         | +         | -                | 1             |
| 14C17-1-17-3       | -         | -         | -         | -         | -         | -         | +         | -                | 1             |
| 14C18-1-18-1       | -         | -         | -         | -         | -         | -         | +         | -                | 1             |
| 14C18-1-18-2       | -         | -         | -         | -         | -         | -         | +         | -                | 1             |
| 14C19-1-19-1       |           |           |           |           | -         | +         | -         | -                | 1             |
| 14C19-1-19-2       |           |           |           |           | -         | -         | +         | -                | 1             |
| 14C19-1-19-3       |           |           |           |           | -         | -         | -         | -                |               |
| 14C19-1-19-4       |           |           |           |           | -         | -         | +         | -                | 1             |
| 14C19-1-19-5       |           |           |           |           | -         | -         | -         | -                |               |
| 14C19-1-19-6       |           |           |           |           | -         | -         | +         | -                | 1             |
| 14C19-1-19-7       |           |           |           |           | -         | +         | -         | -                | 1             |
| 14C20-1-20-1       |           |           |           |           | -         | -         | -         | -                |               |
| 14C20-1-20-2       |           |           |           |           | -         | -         | -         | -                |               |
| 14C20-1-20-3       |           |           |           |           | -         | -         | -         | -                |               |
| AC2-1-2-6          | -         | -         | +         | -         | -         | -         | -         | -                | 1             |
| AC2-1-2-7          | -         | -         | -         | -         | -         | +         | -         | -                | 1             |
| AC2-1-2-8          | -         | -         | -         | -         | -         | -         | -         | -                |               |
| AC2-1-2-9          | -         | -         | -         | -         | -         | -         | -         | -                |               |
| AC2-1-2-10         | -         | -         | -         | -         | -         | -         | +         | -                | 1             |
| AC3-1-3-1          | -         | +         | -         | -         | -         | -         | -         | -                | 1             |
| AC3-1-3-2          | -         | -         | -         | -         | -         | -         | +         | -                | 1             |
| AC3-1-3-3          | -         | -         | -         | -         | -         | -         | +         | -                | 1             |
| AC3-1-3-4          | -         | -         | -         | -         | -         | -         | +         | -                | 1             |
| AC3-1-3-5          | -         | -         | -         | -         | -         | -         | -         | -                |               |
| AC3-1-3-6          | -         | -         | -         | -         | -         | -         | -         | -                | 1             |
| AC6-1-6-5          |           |           | +         | -         | +         | -         | -         | +                | 2             |
| AC9-1-4-1          | -         | -         | -         | -         | +         | -         | -         | -                | 1             |
| AC9-1-4-2          |           |           | +         | -         | -         | -         | -         | -                |               |
| AC9-1-4-3          |           |           | -         | -         | -         | -         | -         | -                |               |
| AC9-1-4-4          |           |           | -         | -         | -         | -         | -         | -                |               |
|                    |           |           |           |           |           |           |           |                  |               |
| <b>Affected</b>    | <b>0</b>  | <b>1</b>  | <b>5</b>  | <b>1</b>  | <b>2</b>  | <b>5</b>  | <b>13</b> | <b>1</b>         |               |
| <b>Population</b>  | <b>27</b> | <b>27</b> | <b>27</b> | <b>16</b> | <b>41</b> | <b>39</b> | <b>39</b> | <b>41</b>        |               |

| F1 Vinclozolin Females |           |           |           |           |           |           |           |                  |               |
|------------------------|-----------|-----------|-----------|-----------|-----------|-----------|-----------|------------------|---------------|
| Rat ID                 | Puberty   |           | Ovary     | Kidney    | Tumor     | Lean      | Obese     | Multiple Disease | Total Disease |
|                        | Early     | Late      |           |           |           |           |           |                  |               |
| 14V10-1-10-1           | -         | -         |           |           | -         |           |           |                  |               |
| 14V10-1-10-2           | -         | -         |           |           | -         |           |           |                  |               |
| 14V10-1-10-3           | -         | -         |           |           | -         |           |           |                  |               |
| 14V10-1-10-4           | -         | -         |           |           | -         |           |           |                  |               |
| 14V10-1-10-5           | -         | -         |           |           | -         |           |           |                  |               |
| 14V10-1-10-6           | -         | -         |           |           | -         |           |           |                  |               |
| 14V10-1-10-7           | -         | -         |           |           | -         |           |           |                  |               |
| 14V10-1-10-8           | -         | -         |           |           | -         |           |           |                  |               |
| 14V1-1-1-1             | -         | -         | -         | -         | -         | +         | -         | -                | 1             |
| 14V11-1-11-1           | -         | -         |           |           | -         | -         | +         | -                | 1             |
| 14V11-1-11-2           | -         | -         |           |           | -         | -         | -         | -                |               |
| 14V11-1-11-3           | -         | -         |           |           | -         | -         | -         | -                |               |
| 14V1-1-1-2             | -         | -         | -         | -         | -         | -         | +         | -                | 1             |
| 14V1-1-1-3             | -         | -         | -         | +         | -         | -         | -         | -                | 1             |
| 14V1-1-1-4             | -         | -         | -         | -         | -         | -         | -         | -                |               |
| 14V13-1-13-1           | -         | -         |           |           | -         |           |           | -                |               |
| 14V16-1-16-1           | -         | +         |           |           | -         | -         | -         | -                | 1             |
| 14V16-1-16-2           | -         | -         |           |           | -         | +         | -         | -                | 1             |
| 14V16-1-16-3           | -         | +         |           |           | -         | -         | -         | -                | 1             |
| 14V16-1-16-4           | -         | -         |           |           | -         | -         | -         | -                |               |
| 14V16-1-16-5           | -         | -         |           |           | -         | -         | -         | -                |               |
| 14V16-1-16-6           | -         | -         |           |           | -         | -         | -         | -                |               |
| 14V2-1-2-2             | -         | -         | -         | -         | -         |           |           | -                |               |
| 14V2-1-2-3             | -         | -         | +         | -         | -         |           |           | -                | 1             |
| 14V2-1-2-4             | -         | -         | -         | -         | -         |           |           | -                |               |
| 14V2-1-2-5             | -         | -         | -         | -         | -         | -         | -         | -                |               |
| 14V2-1-2-6             | -         | -         |           |           | -         | -         | -         | -                |               |
| 14V2-1-2-7             | -         | -         |           |           | -         | -         | -         | -                |               |
| 14V3-1-3-1             | -         | -         | -         | +         | -         | -         | +         | +                | 2             |
| 14V3-1-3-2             | -         | -         | -         | -         | -         | -         | -         | -                |               |
| 14V3-1-3-3             | -         | -         | -         | -         | -         | -         | +         | -                | 1             |
| 14V5-1-5-1             | -         | -         | -         | -         | -         | -         | -         | -                |               |
| 14V5-1-5-2             | -         | -         | -         | -         | -         | -         | -         | -                |               |
| 14V5-1-5-3             | -         | -         | -         | -         | -         | -         | -         | -                |               |
| 14V5-1-5-4             | -         | -         | -         | -         | +         | -         | -         | -                | 1             |
| 14V5-1-5-7             | -         | -         |           |           | -         | +         | -         | -                | 1             |
| 14V6-1-6-1             | -         | -         |           |           | -         | -         | -         | -                |               |
| 14V6-1-6-2             | -         | -         |           |           | -         | -         | -         | -                |               |
| 14V6-1-6-3             | -         | -         |           |           | -         | -         | -         | -                |               |
| 14V7-1-7-1             | -         | -         |           |           | -         | -         | -         | -                |               |
| 14V7-1-7-2             | -         | -         |           |           | -         | -         | -         | -                |               |
| 14V7-1-7-4             | -         | -         |           |           | -         | -         | +         | -                | 1             |
| 14V7-1-7-5             | -         | -         |           |           | -         | +         | -         | -                | 1             |
|                        |           |           |           |           |           |           |           |                  |               |
| <b>Affected</b>        | <b>0</b>  | <b>2</b>  | <b>1</b>  | <b>2</b>  | <b>1</b>  | <b>4</b>  | <b>5</b>  | <b>1</b>         |               |
| <b>Population</b>      | <b>43</b> | <b>43</b> | <b>15</b> | <b>15</b> | <b>43</b> | <b>31</b> | <b>31</b> | <b>35</b>        |               |
