# Supplementary material for: Vinclozolin induced epigenetic transgenerational inheritance of pathologies and sperm epimutation biomarkers for specific diseases
Source: PubMed Central journal article supplement (PMC6114855; doi:10.1371/journal.pone.0202662), 2018-08-29
Supplement: pone.0202662.s003.pdf [file pone.0202662.s003.pdf]

Supplemental Table S2

| F2 Control Males  |           |           |           |           |           |           |           |           |                  |               |
|-------------------|-----------|-----------|-----------|-----------|-----------|-----------|-----------|-----------|------------------|---------------|
| Rat ID            | Puberty   |           | Testis    | Prostate  | Kidney    | Tumor     | Lean      | Obese     | Multiple Disease | Total Disease |
|                   | Early     | Late      |           |           |           |           |           |           |                  |               |
| 14C10-2-7-4       | -         | -         | -         | -         | -         | -         | -         | -         | -                |               |
| 14C10-2-7-5       | -         | -         | +         | -         | -         | -         | -         | -         | -                |               |
| 14C10-2-7-6       | -         | -         |           |           |           |           |           |           |                  |               |
| 14C10-2-7-7       | -         | -         |           |           |           |           |           |           |                  |               |
| 14C17-2-13-6      | -         | -         | -         | -         | -         | -         | +         | -         | -                | 1             |
| 14C17-2-13-7      | -         | -         |           |           |           |           | +         | -         | -                | 1             |
| 14C17-2-13-8      |           |           | -         | -         | -         | -         | +         | -         | -                | 1             |
| 14C17-2-13-11     | -         | -         |           |           |           |           |           |           |                  |               |
| 14C17-2-13-12     | -         | -         |           |           |           |           |           |           |                  |               |
| 14C18-2-16-3      |           |           |           |           |           | -         | -         | -         | -                |               |
| 14C18-2-16-4      |           |           |           |           |           | -         | -         | -         | -                |               |
| 14C18-2-16-5      |           |           |           |           |           | -         | +         | -         | -                | 1             |
| 14C18-2-17-4      |           |           |           |           |           | -         | +         | -         | -                | 1             |
| 14C18-2-17-5      |           |           |           |           |           | -         | -         | -         | -                |               |
| 14C19-2-17-6      |           |           |           |           |           | -         | -         | -         | -                |               |
| 14C19-2-17-7      |           |           |           |           |           | -         | -         | -         | -                |               |
| 14C19-2-17-8      |           |           |           |           |           | -         | -         | -         | -                |               |
| 14C19-2-17-9      |           |           |           |           |           | -         | -         | -         | -                |               |
| 14C19-2-17-10     |           |           |           |           |           | -         | -         | -         | -                |               |
| 14C19-2-18-7      |           |           |           |           |           | -         | -         | -         | -                |               |
| 14C19-2-18-8      |           |           |           |           |           | -         | -         | -         | -                |               |
| 14C19-2-18-9      |           |           |           |           |           | -         | -         | -         | -                |               |
| 14C19-2-19-3      | -         | -         |           |           |           | -         | -         | -         | -                |               |
| 14C19-2-19-4      | -         | -         |           |           |           | -         | -         | +         | -                | 1             |
| 14C19-2-19-5      |           |           |           |           |           | -         | -         | +         | -                | 1             |
| 14C19-2-19-6      |           |           |           |           |           | -         | -         | -         | -                |               |
| 14C20-2-20-10     |           |           |           |           |           | -         | +         | -         | -                | 1             |
| 14C20-2-20-11     |           |           |           |           |           | -         | +         | -         | -                | 1             |
| 14C20-2-20-12     |           |           |           |           |           | -         | -         | -         | -                |               |
| 14C20-2-21-4      | -         | +         |           |           |           | -         | -         | -         | -                | 1             |
| 14C20-2-21-5      |           |           |           |           |           | -         | -         | -         | -                |               |
| 14C20-2-21-6      |           |           |           |           |           | -         | -         | -         | -                |               |
| 14C20-2-21-7      | -         | +         |           |           |           | -         | -         | -         | -                | 1             |
| 14C20-2-21-8      |           |           |           |           |           | -         | -         | -         | -                |               |
| 14C20-2-21-9      | -         | +         |           |           |           | -         | -         | -         | -                | 1             |
| 14C20-2-22-7      | -         | -         |           |           |           | -         | -         | -         | -                |               |
| 14C20-2-22-8      | -         | -         |           |           |           | -         | -         | -         | -                |               |
| 14C20-2-22-9      |           |           |           |           |           | -         | -         | -         | -                |               |
| 14C20-2-22-10     | -         | -         |           |           |           | -         | -         | -         | -                |               |
| 14C20-2-22-11     | -         | -         |           |           |           | -         | -         | +         | -                | 1             |
| 14C20-2-22-12     |           |           |           |           |           | -         | -         | -         | -                |               |
| AC2-2-1-6         |           |           | +         | +         | -         | -         | -         | +         | +                | 3             |
| AC2-2-1-7         |           |           | +         | -         | -         | -         | +         | -         | +                | 2             |
| AC2-2-3-3         | -         | -         | -         | -         | -         | -         | -         | -         | -                |               |
| AC2-2-10-5        | -         | -         | -         | -         | -         | -         | -         | -         | -                |               |
| AC2-2-10-6        | -         | -         | -         | -         | -         | -         | +         | -         | -                | 1             |
| AC2-2-10-7        | -         | -         |           |           |           |           |           |           |                  |               |
| AC2-2-10-8        | -         | -         |           |           |           |           |           |           |                  |               |
| AC6-2-2-4         |           |           | -         | -         | -         | -         | -         | -         | -                |               |
| AC6-2-2-5         |           |           | -         | +         | -         | -         | -         | -         | -                | 1             |
| AC6-2-2-6         | -         | -         | -         | +         | -         | -         | -         | +         | +                | 2             |
| AC6-2-12-6        | -         | -         | -         | -         | -         | +         | -         | -         | -                | 1             |
| AC6-2-12-7        | -         | -         | -         | -         | -         | -         | -         | -         | -                |               |
| AC6-2-12-8        | -         | -         | -         | +         | -         | -         | -         | -         | -                | 1             |
| AC9-2-6-4         | -         | -         | -         | -         | -         | -         | -         | -         | -                |               |
| AC9-2-6-5         | -         | -         | -         | -         | +         | -         | -         | -         | -                |               |
| AC9-2-6-6         | -         | -         |           |           |           |           |           |           |                  |               |
| AC9-2-6-7         | -         | -         |           |           |           |           |           |           |                  |               |
| AC9-2-6-8         | -         | -         |           |           |           |           |           |           |                  |               |
| AC9-2-11-3        | -         | -         | -         | -         | -         | -         | -         | +         | -                | 1             |
| <b>Affected</b>   | <b>0</b>  | <b>3</b>  | <b>3</b>  | <b>4</b>  | <b>1</b>  | <b>1</b>  | <b>9</b>  | <b>6</b>  | <b>3</b>         |               |
| <b>Population</b> | <b>32</b> | <b>32</b> | <b>18</b> | <b>18</b> | <b>16</b> | <b>51</b> | <b>50</b> | <b>50</b> | <b>51</b>        |               |

| F2 Vinclozolin Males |           |           |           |           |           |           |           |           |           |         |
|----------------------|-----------|-----------|-----------|-----------|-----------|-----------|-----------|-----------|-----------|---------|
|                      | Puberty   |           | Testis    | Prostate  | Kidney    | Tumor     | Lean      | Obese     | Multiple  | Total   |
| Rat ID               | Early     | Late      |           |           |           |           |           |           | Disease   | Disease |
| 14V1-2-2-5           | -         | -         | -         | -         | -         | -         | -         | -         | -         |         |
| 14V1-2-2-6           | -         | -         | +         | -         | +         | -         | -         | -         | +         | 2       |
| 14V1-2-2-7           | -         | -         | -         | -         | -         | -         | -         | -         | -         |         |
| 14V2-2-3-2           | -         | -         | -         | +         | -         | -         | -         | +         | +         | 2       |
| 14V2-2-3-3           | -         | -         | -         | -         | +         | -         | -         | -         | -         | 1       |
| 14V3-2-4-5           | +         | -         | -         | -         | -         | -         | -         | -         | -         | 1       |
| 14V3-2-4-6           | +         | -         | -         | -         | -         | -         | -         | -         | -         | 1       |
| 14V6-2-5-10          | -         | -         | -         | -         | -         | -         | -         | -         | -         |         |
| 14V6-2-5-11          | -         | -         | -         | -         | -         | -         | -         | -         | -         |         |
| 14V6-2-5-12          | -         | -         | -         | -         | -         | -         | -         | -         | -         |         |
| 14V6-2-5-13          | -         | -         | +         | -         | -         | -         | -         | -         | -         | 1       |
| 14V6-2-7-2           | -         | -         | +         | -         | -         | -         | -         | -         | -         | 1       |
| 14V7-2-6-1           | -         | -         | +         | -         | +         | -         | +         | -         | +         | 3       |
| 15V1-2-1-10          | -         | -         | +         | -         | -         | -         | -         | -         | -         | 1       |
| 15V1-2-1-5           | -         | -         | +         | -         | -         | -         | -         | -         | -         | 1       |
| 15V1-2-1-6           | -         | -         | -         | -         | -         | -         | -         | -         | -         |         |
| 15V1-2-1-7           | -         | -         | +         | -         | -         | -         | -         | -         | -         | 1       |
| 15V1-2-1-8           | -         | -         | -         | +         | -         | -         | -         | -         | -         | 1       |
| 15V1-2-1-9           | -         | -         | +         | -         | -         | -         | -         | -         | -         | 1       |
| 15V1-2-2-6           | -         | -         | +         | -         | -         | -         | -         | -         | -         | 1       |
| 15V1-2-2-7           | -         | -         | +         | -         | -         | -         | -         | -         | -         | 1       |
| 15V1-2-2-9           | -         | -         | +         | +         | -         | -         | -         | -         | +         | 2       |
| 15V1-2-3-10          | -         | -         | -         | -         | -         | -         | -         | -         | -         |         |
| 15V1-2-3-9           | -         | -         | -         | +         | -         | -         | -         | -         | -         | 1       |
| 15V14-2-3-10         |           |           |           |           |           | -         | -         | +         | -         | 1       |
| 15V14-2-3-6          |           |           |           |           |           | -         | -         | +         | -         | 1       |
| 15V14-2-3-7          |           |           |           |           |           | -         | -         | -         | -         |         |
| 15V14-2-3-8          |           |           |           |           |           | -         | -         | -         | -         |         |
| 15V14-2-3-9          |           |           |           |           |           | -         | -         | +         | -         | 1       |
| 15V15-2-4-10         |           |           |           |           |           | -         | -         | +         | -         | 1       |
| 15V15-2-4-5          |           |           |           |           |           | -         | +         | -         | -         | 1       |
| 15V15-2-4-6          |           |           |           |           |           | -         | -         | -         | -         |         |
| 15V15-2-4-7          |           |           |           |           |           | -         | -         | -         | -         |         |
| 15V15-2-4-8          |           |           |           |           |           | -         | -         | -         | -         |         |
| 15V15-2-4-9          |           |           |           |           |           | -         | -         | -         | -         |         |
| 15V15-2-5-10         |           |           |           |           |           | -         | -         | +         | -         | 1       |
| 15V15-2-5-5          |           |           |           |           |           | -         | -         | +         | -         | 1       |
| 15V15-2-5-6          |           |           |           |           |           | -         | -         | -         | -         |         |
| 15V15-2-5-7          |           |           |           |           |           | -         | -         | -         | -         |         |
| 15V15-2-5-8          |           |           |           |           |           | -         | -         | -         | -         |         |
| 15V15-2-5-9          |           |           |           |           |           | -         | -         | -         | -         |         |
| 15V25-2-9-10         |           |           |           |           |           | -         | -         | +         | -         | 1       |
| 15V25-2-9-6          |           |           |           |           |           | -         | -         | +         | -         | 1       |
| 15V25-2-9-7          |           |           |           |           |           | -         | +         | -         | -         | 1       |
| 15V25-2-9-8          |           |           |           |           |           | -         | -         | +         | -         | 1       |
| 15V25-2-9-9          |           |           |           |           |           | -         | -         | -         | -         |         |
|                      |           |           |           |           |           |           |           |           |           |         |
| <b>Affected</b>      | <b>2</b>  | <b>0</b>  | <b>11</b> | <b>4</b>  | <b>3</b>  | <b>0</b>  | <b>3</b>  | <b>10</b> | <b>4</b>  |         |
| <b>Population</b>    | <b>33</b> | <b>33</b> | <b>22</b> | <b>21</b> | <b>22</b> | <b>46</b> | <b>43</b> | <b>43</b> | <b>46</b> |         |

| F2 Control Females |           |           |           |           |           |           |           |                  |               |
|--------------------|-----------|-----------|-----------|-----------|-----------|-----------|-----------|------------------|---------------|
|                    | Puberty   |           | Ovary     | Kidney    | Tumor     | Lean      | Obese     | Multiple Disease | Total Disease |
| Rat ID             | Early     | Late      |           |           |           |           |           |                  |               |
| 14C10-2-7-1        | -         | -         | -         | -         | -         | -         | -         | -                |               |
| 14C10-2-7-2        | -         | -         | +         | -         | -         | -         | -         | -                |               |
| 14C10-2-7-3        | -         | -         | -         | -         | -         | -         | -         | -                |               |
| 14C10-2-8-1        | -         | -         | -         | -         | -         | -         | -         | -                |               |
| 14C10-2-8-2        | -         | -         | +         | -         | -         | -         | -         | -                | 1             |
| 14C10-2-8-3        | -         | -         | -         | -         | -         | -         | +         | -                | 1             |
| 14C10-2-8-4        | -         | -         | -         | -         | -         | -         | -         | -                |               |
| 14C17-2-13-1       | -         | -         | -         | -         | -         | -         | -         | -                |               |
| 14C17-2-13-2       | -         | -         | -         | -         | -         | -         | -         | -                |               |
| 14C17-2-13-3       | -         | -         | -         | -         | -         | -         | -         | -                |               |
| 14C17-2-13-4       | -         | -         | -         | -         | -         | +         | -         | -                | 1             |
| 14C17-2-13-5       | -         | -         | -         | -         | -         | +         | -         | -                | 1             |
| 14C18-2-16-1       | -         | -         | -         | -         | -         | -         | -         | -                |               |
| 14C18-2-17-1       | -         | -         | -         | -         | -         | -         | -         | -                |               |
| 14C18-2-17-2       | -         | -         | -         | -         | -         | +         | -         | -                | 1             |
| 14C18-2-17-3       | -         | -         | -         | -         | -         | -         | -         | -                |               |
| 14C18-2-17-4       | -         | -         | -         | -         | -         | -         | -         | -                |               |
| 14C18-2-17-5       | -         | -         | -         | -         | -         | -         | -         | -                |               |
| 14C19-2-19-2       | -         | -         | -         | -         | -         | -         | -         | -                |               |
| 14C20-2-20-1       | -         | -         | -         | -         | -         | -         | -         | -                |               |
| 14C20-2-20-3       | -         | -         | -         | -         | -         | -         | -         | -                |               |
| 14C20-2-20-4       | -         | -         | -         | -         | -         | -         | -         | -                |               |
| 14C20-2-20-5       | -         | -         | -         | -         | -         | -         | -         | -                |               |
| 14C20-2-20-6       | -         | -         | -         | -         | -         | -         | -         | -                |               |
| 14C20-2-20-7       | -         | -         | -         | -         | -         | -         | -         | -                |               |
| 14C20-2-20-9       | -         | -         | -         | -         | -         | -         | -         | -                |               |
| 14C20-2-21-1       | -         | -         | -         | -         | -         | -         | -         | -                |               |
| 14C20-2-21-3       | -         | -         | -         | -         | -         | -         | -         | -                |               |
| 14C20-2-22-1       | -         | -         | -         | -         | -         | -         | -         | -                |               |
| 14C20-2-22-2       | -         | -         | -         | -         | -         | -         | -         | -                |               |
| 14C20-2-22-3       | -         | -         | -         | -         | -         | -         | -         | -                |               |
| 14C20-2-22-4       | -         | -         | -         | -         | -         | -         | -         | -                |               |
| 14C20-2-22-6       | -         | -         | -         | -         | -         | -         | -         | -                |               |
| AC2-2-1-1          | -         | -         | -         | +         | -         | -         | -         | -                | 1             |
| AC2-2-1-2          | -         | -         | -         | -         | -         | -         | -         | -                |               |
| AC2-2-1-3          | -         | -         | -         | -         | -         | -         | -         | -                |               |
| AC2-2-1-4          | -         | -         | -         | -         | -         | -         | +         | -                | 1             |
| AC2-2-1-5          | -         | -         | -         | -         | -         | -         | +         | -                | 1             |
| AC2-2-3-1          | -         | -         | -         | -         | -         | -         | +         | -                | 1             |
| AC2-2-3-2          | -         | -         | -         | -         | -         | -         | -         | -                |               |
| AC2-2-5-1          | -         | -         | -         | -         | -         | -         | -         | -                |               |
| AC2-2-10-1         | -         | -         | -         | -         | -         | -         | +         | -                | 1             |
| AC2-2-10-2         | -         | -         | -         | -         | -         | -         | +         | -                | 1             |
| AC2-2-10-3         | -         | -         | -         | -         | -         | -         | -         | -                |               |
| AC2-2-10-4         | -         | -         | -         | -         | -         | -         | -         | -                |               |
| AC6-2-2-1          | -         | -         | +         | -         | -         | -         | -         | -                | 1             |
| AC6-2-2-2          | -         | -         | -         | -         | -         | -         | -         | -                |               |
| AC6-2-2-3          | -         | -         | -         | +         | -         | -         | -         | +                | 1             |
| AC6-2-12-1         | -         | -         | -         | -         | -         | -         | -         | -                |               |
| AC6-2-12-2         | -         | -         | -         | -         | -         | -         | -         | -                |               |
| AC6-2-12-3         | -         | -         | +         | -         | -         | -         | -         | -                | 1             |
| AC6-2-12-4         | -         | -         | -         | -         | -         | -         | -         | -                |               |
| AC6-2-12-5         | -         | -         | -         | -         | +         | -         | -         | -                | 1             |
| AC9-2-6-1          | -         | -         | +         | +         | -         | -         | -         | +                | 2             |
| AC9-2-6-2          | -         | -         | -         | -         | -         | +         | -         | -                | 1             |
| AC9-2-6-3          | -         | -         | -         | -         | -         | -         | +         | -                | 1             |
| AC9-2-11-1         | -         | -         | +         | -         | -         | -         | -         | -                | 1             |
| AC9-2-11-2         | -         | -         | -         | -         | -         | -         | -         | -                |               |
|                    |           |           |           |           |           |           |           |                  |               |
| <b>Affected</b>    | <b>0</b>  | <b>0</b>  | <b>6</b>  | <b>3</b>  | <b>1</b>  | <b>4</b>  | <b>7</b>  | <b>1</b>         |               |
| <b>Population</b>  | <b>47</b> | <b>47</b> | <b>22</b> | <b>22</b> | <b>51</b> | <b>50</b> | <b>50</b> | <b>51</b>        |               |

| F2 Vinclozolin Females |           |           |           |           |           |           |           |                  |               |
|------------------------|-----------|-----------|-----------|-----------|-----------|-----------|-----------|------------------|---------------|
| Rat ID                 | Puberty   |           | Ovary     | Kidney    | Tumor     | Lean      | Obese     | Multiple Disease | Total Disease |
|                        | Early     | Late      |           |           |           |           |           |                  |               |
| 14V1-2-2-1             | -         | -         | -         | +         | -         | -         | -         | -                | 1             |
| 14V1-2-2-2             | -         | -         | +         | -         | -         | -         | -         | -                | 1             |
| 14V1-2-2-3             | -         | -         | -         | -         | -         | -         | -         | -                |               |
| 14V1-2-2-4             | -         | -         | -         | -         | -         | -         | -         | -                |               |
| 14V2-2-3-1             | -         | -         | -         | -         | -         | -         | +         | -                | 1             |
| 14V3-2-4-1             | -         | -         | -         | -         | -         | -         | +         | -                | 1             |
| 14V3-2-4-2             | -         | -         | -         | +         | -         | -         | +         | +                | 2             |
| 14V3-2-4-3             | -         | -         | -         | -         | -         | -         | -         | -                |               |
| 14V6-2-5-1             | -         | -         | -         | -         | +         | +         | -         | +                | 2             |
| 14V6-2-5-2             | -         | -         | -         | -         | +         | -         | -         | -                | 1             |
| 14V6-2-5-3             | -         | -         | -         | -         | -         | -         | -         | -                | 1             |
| 14V6-2-5-4             | -         | -         | -         | -         | -         | +         | -         | -                | 1             |
| 14V6-2-5-5             | -         | -         | -         | -         | -         | +         | -         | -                | 1             |
| 14V6-2-5-6             | -         | -         | -         | -         | -         | +         | -         | -                | 1             |
| 14V6-2-5-7             | -         | -         | -         | -         | -         | -         | -         | -                |               |
| 14V6-2-5-8             | -         | -         | -         | -         | -         | -         | -         | -                |               |
| 14V6-2-7-1             | -         | -         | -         | -         | -         | -         | -         | -                |               |
| 15V1-2-1-1             | -         | -         | -         | -         | -         | -         | -         | -                |               |
| 15V1-2-1-2             | -         | -         | -         | -         | -         | -         | -         | -                | 1             |
| 15V1-2-1-3             | -         | -         | -         | -         | -         | -         | -         | -                | 1             |
| 15V1-2-1-4             | -         | -         | -         | -         | -         | -         | -         | -                |               |
| 15V1-2-2-1             | -         | -         | -         | -         | +         | -         | -         | -                | 1             |
| 15V1-2-2-2             | -         | -         | -         | -         | -         | -         | -         | -                |               |
| 15V1-2-2-3             | -         | -         | -         | -         | -         | -         | +         | -                | 1             |
| 15V1-2-2-4             | -         | -         | -         | -         | -         | -         | -         | -                |               |
| 15V1-2-2-5             | -         | -         | -         | -         | -         | -         | -         | -                |               |
| 15V1-2-3-1             | -         | -         | +         | -         | -         | -         | -         | -                | 1             |
| 15V1-2-3-2             | -         | -         | +         | -         | -         | -         | -         | -                | 1             |
| 15V1-2-3-3             | -         | -         | +         | -         | -         | -         | -         | -                | 1             |
| 15V1-2-3-4             | -         | -         | -         | -         | -         | -         | -         | -                | 1             |
| 15V1-2-3-5             | -         | -         | -         | -         | -         | -         | -         | -                |               |
| 15V1-2-3-6             | -         | -         | -         | -         | -         | -         | -         | -                |               |
| 15V1-2-3-7             | -         | -         | -         | -         | -         | -         | -         | -                |               |
| 15V14-2-3-2            | -         | -         | -         | -         | -         | -         | +         | -                | 1             |
| 15V14-2-3-3            | -         | -         | -         | -         | -         | -         | -         | -                |               |
| 15V14-2-3-4            | -         | -         | -         | -         | -         | -         | -         | -                |               |
| 15V14-2-3-5            | -         | -         | -         | -         | -         | -         | +         | -                | 1             |
| 15V15-2-4-2            | -         | -         | -         | -         | -         | +         | -         | -                | 1             |
| 15V15-2-4-4            | -         | -         | -         | -         | -         | -         | -         | -                |               |
| 15V15-2-5-2            | -         | -         | -         | -         | -         | -         | -         | -                |               |
| 15V15-2-5-4            | -         | -         | -         | -         | -         | -         | +         | -                | 1             |
| 15V2-2-4-1             | -         | -         | -         | -         | -         | -         | -         | -                |               |
| 15V2-2-4-2             | -         | -         | -         | -         | -         | -         | -         | -                |               |
| 15V2-2-4-3             | -         | -         | -         | -         | -         | +         | -         | -                | 1             |
| 15V2-2-4-4             | +         | -         | -         | -         | -         | +         | -         | +                | 2             |
| 15V2-2-4-5             | -         | -         | -         | -         | -         | +         | -         | -                | 1             |
| 15V2-2-4-6             | -         | -         | -         | -         | -         | -         | -         | -                |               |
| 15V25-2-9-1            | -         | -         | -         | -         | -         | -         | +         | -                | 1             |
| 15V25-2-9-2            | -         | -         | -         | -         | -         | -         | +         | -                | 1             |
| 15V25-2-9-3            | -         | -         | -         | -         | -         | -         | +         | -                | 1             |
| 15V25-2-9-4            | -         | -         | -         | -         | -         | -         | +         | -                | 1             |
| 15V25-2-9-5            | -         | -         | -         | -         | -         | -         | +         | -                | 1             |
|                        |           |           |           |           |           |           |           |                  |               |
| <b>Affected</b>        | <b>1</b>  | <b>0</b>  | <b>4</b>  | <b>2</b>  | <b>3</b>  | <b>8</b>  | <b>13</b> | <b>3</b>         |               |
| <b>Population</b>      | <b>39</b> | <b>39</b> | <b>25</b> | <b>25</b> | <b>52</b> | <b>48</b> | <b>48</b> | <b>48</b>        |               |
