# Supplementary material for: Vinclozolin induced epigenetic transgenerational inheritance of pathologies and sperm epimutation biomarkers for specific diseases
Source: PubMed Central journal article supplement (PMC6114855; doi:10.1371/journal.pone.0202662), 2018-08-29
Supplement: pone.0202662.s004.pdf [file pone.0202662.s004.pdf]

Supplemental Table S3

| F3 Control Males  |           |           |           |           |           |           |           |           |                  |               |
|-------------------|-----------|-----------|-----------|-----------|-----------|-----------|-----------|-----------|------------------|---------------|
| Rat ID            | Puberty   |           | Testis    | Prostate  | Kidney    | Tumor     | Lean      | Obese     | Multiple Disease | Total Disease |
|                   | Early     | Late      |           |           |           |           |           |           |                  |               |
| 14C10-3-2-5       | -         | -         |           |           |           |           |           |           | -                |               |
| 14C10-3-2-6       | -         | -         |           |           |           |           |           |           | -                |               |
| 14C10-3-2-7       | -         | -         |           |           |           |           |           |           | -                |               |
| 14C10-3-2-8       | -         | -         | -         | -         | -         | -         | -         | -         | -                |               |
| 14C10-3-2-9       | -         | -         | -         | -         | -         | -         | -         | -         | -                |               |
| 14C10-3-2-10      | -         | -         | -         | -         | -         | -         | -         | -         | -                |               |
| 14C10-3-3-6       | -         | -         |           |           |           |           |           |           | -                |               |
| 14C10-3-3-7       | -         | -         |           |           |           |           |           |           | -                |               |
| 14C10-3-3-8       | -         | -         | -         | -         | -         | -         | -         | -         | -                |               |
| 14C10-3-3-9       | -         | -         | -         | -         | +         | -         | +         | -         | +                | 2             |
| 14C10-3-3-10      | -         | -         | -         | -         | -         | -         | -         | -         | -                |               |
| 14C17-3-4-7       |           |           | -         | -         | -         | -         | +         | -         | -                | 1             |
| 14C17-3-4-8       |           |           | -         | -         | -         | -         | +         | -         | -                | 1             |
| 14C17-3-4-9       |           |           | -         | -         | -         | -         | +         | -         | -                | 1             |
| 14C17-3-4-10      |           |           |           |           |           |           | -         | -         | -                |               |
| 14C17-3-5-5       |           |           | -         | -         | -         | -         | +         | -         | -                | 1             |
| 14C17-3-5-6       |           |           | -         | -         | -         | -         | -         | -         | -                |               |
| 14C17-3-5-7       |           |           | +         | +         | -         | -         | +         | -         | +                | 3             |
| 14C17-3-5-9       |           |           |           |           |           | -         | -         | +         | -                | 1             |
| 14C17-3-5-13      |           |           |           |           |           | -         | -         | -         | -                |               |
| 14C17-3-5-14      |           |           |           |           |           | -         | -         | -         | -                |               |
| 14C17-3-6-9       |           |           | -         | -         | -         | -         | -         | -         | -                |               |
| 14C17-3-6-10      |           |           | +         | -         | -         | -         | -         | -         | -                | 1             |
| AC2-3-3-7         | -         | -         |           |           |           |           |           |           | -                |               |
| AC2-3-3-8         | -         | -         |           |           |           |           |           |           | -                |               |
| AC2-3-3-9         | -         | -         | -         | -         | -         | -         | -         | -         | -                |               |
| AC2-3-3-10        | -         | -         | -         | -         | -         | -         | -         | -         | -                |               |
| AC6-3-1-2         | -         | +         |           |           |           |           |           |           | -                | 1             |
| AC6-3-1-3         | -         | +         |           |           |           |           |           |           | -                | 1             |
| AC6-3-1-4         | -         | +         | -         | -         | -         | -         | -         | -         | -                | 1             |
| AC6-3-1-5         | -         | +         | -         | -         | -         | -         | -         | -         | -                | 1             |
| AC6-3-1-6         | -         | -         | -         | -         | -         | -         | -         | +         | -                | 1             |
| AC6-3-6-6         | -         | -         |           |           |           |           |           |           | -                |               |
| AC6-3-6-7         | -         | -         |           |           |           |           |           |           | -                |               |
| AC6-3-6-8         | -         | -         | -         | -         | -         | -         | -         | -         | -                |               |
| AC6-3-6-9         | -         | -         | -         | -         | +         | -         | -         | -         | -                | 1             |
| AC9-3-4-6         | -         | -         |           |           |           |           |           |           | -                |               |
| AC9-3-4-7         | -         | -         |           |           |           |           |           |           | -                |               |
| AC9-3-4-8         | -         | -         | -         | -         | -         | -         | -         | -         | -                |               |
| AC9-3-4-9         | -         | -         | -         | -         | -         | -         | -         | -         | -                |               |
| AC9-3-4-10        | -         | -         | -         | -         | -         | -         | -         | -         | -                |               |
| AC9-3-5-5         | -         | -         |           |           |           |           |           |           | -                |               |
| AC9-3-5-6         | -         | -         |           |           |           |           |           |           | -                |               |
| AC9-3-5-7         | -         | -         |           |           |           |           |           |           | -                |               |
| AC9-3-5-8         | -         | -         | -         | -         | -         | -         | -         | +         | -                | 1             |
| AC9-3-5-9         | -         | -         | -         | -         | -         | -         | -         | -         | -                |               |
| <b>Affected</b>   | <b>0</b>  | <b>4</b>  | <b>2</b>  | <b>1</b>  | <b>2</b>  | <b>0</b>  | <b>6</b>  | <b>3</b>  | <b>2</b>         |               |
| <b>Population</b> | <b>33</b> | <b>33</b> | <b>26</b> | <b>26</b> | <b>26</b> | <b>31</b> | <b>30</b> | <b>30</b> | <b>46</b>        |               |

| F3 Vinclozolin Males |           |           |           |           |           |           |           |           |                  |               |
|----------------------|-----------|-----------|-----------|-----------|-----------|-----------|-----------|-----------|------------------|---------------|
|                      | Puberty   |           | Testis    | Prostate  | Kidney    | Tumor     | Lean      | Obese     | Multiple Disease | Total Disease |
| Rat ID               | Early     | Late      |           |           |           |           |           |           |                  |               |
| 14V1-3-1-3           | -         | -         | +         | +         | -         | -         | -         | +         | +                | 3             |
| 14V1-3-1-4           | -         | -         | -         | -         | +         | -         | -         | -         | -                | 1             |
| 14V1-3-4-5           | -         | -         | -         | +         | +         | -         | -         | -         | +                | 2             |
| 14V1-3-4-6           | -         | -         | -         | -         | +         | -         | +         | -         | +                | 2             |
| 14V1-3-4-7           | -         | -         | +         | -         | -         | -         | -         | -         | -                | 1             |
| 14V1-3-4-8           | -         | -         |           |           |           | -         |           |           | -                |               |
| 14V1-3-4-9           | -         | -         |           |           |           | -         |           |           | -                |               |
| 14V1-3-4-10          | -         | -         |           |           |           | -         |           |           | -                |               |
| 14V1-3-4-11          | -         | -         |           |           |           | -         |           |           | -                |               |
| 14V1-3-4-12          | -         | -         |           |           |           | -         |           |           | -                |               |
| 14V2-3-3-7           | -         | -         | -         | -         | +         | -         | -         | +         | +                | 2             |
| 14V2-3-3-8           | -         | -         | +         | +         | -         | -         | -         | -         | +                | 2             |
| 14V2-3-3-9           | -         | -         |           |           |           | -         |           |           | -                |               |
| 14V2-3-3-10          | -         | -         |           |           |           | -         |           |           | -                |               |
| 14V3-3-2-5           | -         | -         | -         | +         | -         | -         | -         | +         | +                | 2             |
| 14V3-3-2-7           | -         | -         |           |           |           | -         |           |           | -                |               |
| 14V3-3-2-6           | -         | -         | -         | -         | -         | -         | -         | -         | -                |               |
| 14V3-3-2-8           | -         | -         |           |           |           | -         |           |           | -                |               |
| 14V3-3-8-6           | -         | -         | -         | -         | +         | -         | +         | -         | +                | 2             |
| 14V3-3-8-7           | -         | -         | +         | -         | +         | -         | -         | -         | +                | 2             |
| 14V3-3-8-8           | -         | -         |           |           |           | -         |           |           | -                |               |
| 14V6-3-6-6           | -         | -         | -         | -         | +         | -         | -         | -         | -                | 1             |
| 14V6-3-6-7           | -         | -         | +         | -         | +         | -         | -         | -         | +                | 2             |
| 14V6-3-6-8           | -         | -         |           |           |           | -         |           |           | -                |               |
| 14V6-3-7-2           | -         | -         | +         | -         | +         | -         | +         | -         | +                | 3             |
| 14V6-3-7-3           | -         | -         |           |           |           | -         |           |           | -                |               |
| 15V14-3-14-6         | -         | -         | -         | +         | -         | -         | -         | -         | -                | 1             |
| 15V14-3-14-7         | -         | -         | +         | -         | +         | -         | -         | -         | +                | 2             |
| 15V14-3-14-8         | -         | -         | +         | -         | -         | -         | -         | +         | +                | 2             |
| 15V14-3-14-9         | -         | -         | -         | +         | -         | -         | -         | +         | +                | 2             |
| 15V14-3-14-10        | -         | -         |           |           |           | -         |           |           | -                |               |
| 15V14-3-14-11        | -         | -         |           |           |           | -         |           |           | -                |               |
| 15V14-3-14-12        | -         | -         |           |           |           | -         |           |           | -                |               |
| 15V14-3-14-13        | -         | -         |           |           |           | -         |           |           | -                |               |
| 15V14-3-15-10        | -         | -         | +         | -         | -         | -         | -         | -         | -                | 1             |
| 15V14-3-15-11        | -         | -         | +         | +         | +         | -         | -         | -         | +                | 3             |
| 15V14-3-15-7         | -         | -         | +         | +         | -         | -         | -         | +         | +                | 3             |
| 15V14-3-15-8         |           |           | +         | +         | -         | -         | -         | -         | +                | 2             |
| 15V14-3-15-9         | -         | -         | -         | +         | -         | -         | -         | -         | -                | 1             |
| 15V15-3-17-9         |           |           | +         | +         |           | -         | -         | -         | +                | 2             |
| 15V15-3-19-8         | -         | -         |           |           |           | -         |           |           | -                |               |
| 15V15-3-19-7         | -         | -         |           |           |           | -         |           |           | -                |               |
| 15V25-3-20-5         | -         | -         | -         | -         | -         | -         | -         | -         | -                |               |
| 15V25-3-20-6         | -         | -         | -         | +         | +         | -         | -         | +         | +                | 3             |
| 15V25-3-20-7         | -         | -         | -         | +         | +         | -         | -         | -         | +                | 2             |
| 15V25-3-20-9         | -         | +         |           |           |           | +         |           |           | +                | 2             |
| <b>Affected</b>      | <b>0</b>  | <b>1</b>  | <b>13</b> | <b>13</b> | <b>13</b> | <b>1</b>  | <b>3</b>  | <b>7</b>  | <b>20</b>        |               |
| <b>Population</b>    | <b>44</b> | <b>44</b> | <b>27</b> | <b>27</b> | <b>26</b> | <b>46</b> | <b>27</b> | <b>27</b> | <b>46</b>        |               |

| F3 Control Females |           |           |           |           |           |           |           |                  |               |
|--------------------|-----------|-----------|-----------|-----------|-----------|-----------|-----------|------------------|---------------|
|                    | Puberty   |           | Ovary     | Kidney    | Tumor     | Lean      | Obese     | Multiple Disease | Total Disease |
| Rat ID             | Early     | Late      |           |           |           |           |           |                  |               |
| 14C10-3-2-1        | -         | -         | -         | +         | -         | -         | -         | -                | 1             |
| 14C10-3-2-2        | -         | -         | -         | -         | -         | -         | -         | -                |               |
| 14C10-3-2-3        | -         | -         | -         | -         | -         | -         | -         | -                |               |
| 14C10-3-2-4        | -         | -         | -         | -         | -         | -         | -         | -                |               |
| 14C10-3-3-1        | -         | -         | +         | -         | -         | -         | -         | -                | 1             |
| 14C10-3-3-2        | -         | -         | -         | -         | -         | -         | -         | -                |               |
| 14C10-3-3-3        | -         | -         | -         | -         | -         | -         | -         | -                |               |
| 14C10-3-3-4        | -         | -         | +         | +         | -         | -         | -         | +                | 2             |
| 14C10-3-3-5        | -         | -         | -         | -         | -         | +         | -         | -                | 1             |
| 14C17-3-4-1        |           |           |           |           | -         | -         | -         | -                |               |
| 14C17-3-4-2        |           |           |           |           | -         | -         | -         | -                |               |
| 14C17-3-4-3        |           |           |           |           | -         | +         | -         | -                | 1             |
| 14C17-3-4-4        |           |           |           |           | -         | -         | -         | -                |               |
| 14C17-3-4-5        |           |           |           |           | -         | -         | -         | -                |               |
| 14C17-3-4-6        |           |           |           |           | -         | +         | -         | -                | 1             |
| 14C17-3-5-1        |           |           |           |           | -         | -         | -         | -                |               |
| 14C17-3-5-2        |           |           |           |           | -         | -         | -         | -                |               |
| 14C17-3-5-3        |           |           |           |           | -         | -         | -         | -                |               |
| 14C17-3-5-4        |           |           |           |           | -         | -         | -         | -                |               |
| 14C17-3-6-1        |           |           |           |           | -         | -         | -         | -                |               |
| 14C17-3-6-2        |           |           |           |           | -         | -         | -         | -                |               |
| 14C17-3-6-3        |           |           |           |           | -         | -         | -         | -                |               |
| 14C17-3-6-4        |           |           |           |           | -         | -         | -         | -                |               |
| 14C17-3-6-5        |           |           |           |           | -         | -         | +         | -                | 1             |
| 14C17-3-6-6        |           |           |           |           | -         | -         | +         | -                | 1             |
| 14C17-3-6-7        |           |           |           |           | -         | -         | +         | -                | 1             |
| AC2-3-3-1          | -         | -         | +         | -         | -         | -         | -         | -                | 1             |
| AC2-3-3-2          | -         | -         | -         | -         | -         | -         | -         | -                |               |
| AC2-3-3-3          | -         | -         | +         | -         | -         | -         | -         | -                | 1             |
| AC2-3-3-4          | -         | -         | -         | -         | -         | -         | -         | -                |               |
| AC2-3-3-5          | -         | -         | -         | -         | +         | -         | -         | -                |               |
| AC2-3-3-6          | -         | -         | -         | -         | -         | -         | -         | -                |               |
| AC2-3-7-1          | -         | -         | -         | -         | -         | -         | -         | -                |               |
| AC2-3-7-2          |           |           |           |           | -         | -         | -         | -                |               |
| AC6-3-1-1          | -         | +         |           |           |           |           |           | -                | 1             |
| AC6-3-1-7          | -         | -         | -         | -         | -         | -         | -         | -                |               |
| AC6-3-1-8          | -         | -         | -         | -         | -         | -         | -         | -                |               |
| AC6-3-6-1          |           |           |           |           | -         | -         | -         | -                |               |
| AC6-3-6-2          |           |           |           |           | +         | -         | -         | -                | 1             |
| AC6-3-6-3          |           |           |           |           | -         | -         | -         | -                |               |
| AC6-3-6-4          |           |           |           |           | -         | -         | -         | -                |               |
| AC6-3-6-5          |           |           |           |           | -         | -         | -         | -                |               |
| AC9-3-4-1          | -         | -         | -         | -         | -         | -         | -         | -                |               |
| AC9-3-4-2          | -         | -         | -         | -         | -         | -         | -         | -                |               |
| AC9-3-4-3          | -         | -         | -         | -         | -         | -         | -         | -                |               |
| AC9-3-4-4          |           |           |           |           | -         | -         | +         | -                | 1             |
| AC9-3-4-5          | -         | -         | -         | -         | -         | -         | -         | -                |               |
| AC9-3-5-1          | -         | -         | -         | -         | -         | -         | -         | -                |               |
| AC9-3-5-2          | -         | -         | -         | -         | -         | -         | -         | -                |               |
| AC9-3-5-3          | -         | -         | -         | -         | -         | -         | -         | -                |               |
| AC9-3-5-4          | -         | -         | -         | -         | -         | -         | -         | -                |               |
|                    |           |           |           |           |           |           |           |                  |               |
| <b>Affected</b>    | <b>0</b>  | <b>1</b>  | <b>5</b>  | <b>2</b>  | <b>1</b>  | <b>4</b>  | <b>3</b>  | <b>1</b>         |               |
| <b>Population</b>  | <b>27</b> | <b>27</b> | <b>30</b> | <b>30</b> | <b>50</b> | <b>50</b> | <b>50</b> | <b>50</b>        |               |



|                   |           |           |           |           |           |           |           |           |   |
|-------------------|-----------|-----------|-----------|-----------|-----------|-----------|-----------|-----------|---|
| 15V2-3-10-1       |           |           |           |           | +         |           |           | -         | 1 |
| 15V2-3-10-2       |           |           |           |           | -         | -         | -         | -         |   |
| 15V2-3-10-3       |           |           |           |           | -         | +         | -         | -         | 1 |
| 15V2-3-10-4       |           |           |           |           | -         | -         | -         | -         |   |
| 15V2-3-10-5       |           |           |           |           | -         | -         | -         | -         |   |
| 15V2-3-9-1        |           |           |           |           | -         | -         | -         | -         |   |
| 15V2-3-9-2        |           |           |           |           | -         | -         | -         | -         |   |
| 15V25-3-20-1      | -         | -         |           |           | -         | -         | -         | -         |   |
| 15V25-3-20-2      | -         | -         |           |           | -         | -         | +         | -         | 1 |
| 15V25-3-20-3      | -         | -         |           |           | -         | -         | -         | -         |   |
| 15V25-3-20-4      | -         | -         |           |           | -         | -         | -         | -         |   |
|                   |           |           |           |           |           |           |           |           |   |
| <b>Affected</b>   | <b>0</b>  | <b>0</b>  | <b>9</b>  | <b>7</b>  | <b>4</b>  | <b>10</b> | <b>16</b> | <b>10</b> |   |
| <b>Population</b> | <b>59</b> | <b>59</b> | <b>24</b> | <b>24</b> | <b>66</b> | <b>64</b> | <b>64</b> | <b>66</b> |   |
