# Supplementary material for: Vinclozolin induced epigenetic transgenerational inheritance of pathologies and sperm epimutation biomarkers for specific diseases
Source: PubMed Central journal article supplement (PMC6114855; doi:10.1371/journal.pone.0202662), 2018-08-29
Supplement: pone.0202662.s005.pdf [file pone.0202662.s005.pdf]

**Supplemental Table S4**  
**Testis Disease DMR Signature List**

| DMR Name       | Chr | Start     | Length | # Sig Win | minP     | Log Fold Change | CpG # | CpG Density | Gene Annotation      | Gene Category             |
|----------------|-----|-----------|--------|-----------|----------|-----------------|-------|-------------|----------------------|---------------------------|
| DMR1:36596901  | 1   | 36596901  | 300    | 1         | 8.38E-06 | -1.14           | 5     | 1.666666667 | AABR07001061.1       |                           |
| DMR1:56920701  | 1   | 56920701  | 1200   | 1         | 4.89E-06 | -1.91           | 12    | 1           | Wdr27                |                           |
| DMR1:77593601  | 1   | 77593601  | 200    | 1         | 8.72E-06 | 1.78            | 2     | 1           |                      |                           |
| DMR1:85699401  | 1   | 85699401  | 100    | 1         | 7.10E-06 | -2.23           | 1     | 1           |                      |                           |
| DMR1:91600001  | 1   | 91600001  | 300    | 1         | 7.30E-07 | -1.4            | 6     | 2           | Rhpn2                | Signaling                 |
| DMR1:116281301 | 1   | 116281301 | 1500   | 1         | 1.25E-06 | -1.48           | 14    | 0.933333333 |                      |                           |
| DMR1:139286401 | 1   | 139286401 | 400    | 1         | 2.26E-06 | -1.29           | 2     | 0.5         |                      |                           |
| DMR1:208812201 | 1   | 208812201 | 100    | 1         | 8.75E-06 | -1.48           | 3     | 3           |                      |                           |
| DMR1:208961201 | 1   | 208961201 | 200    | 1         | 8.39E-06 | 1.39            | 0     | 0           |                      |                           |
| DMR1:240443901 | 1   | 240443901 | 200    | 2         | 3.17E-06 | -1.86           | 1     | 0.5         | Trpm3                | Receptor                  |
| DMR1:249518201 | 1   | 249518201 | 500    | 1         | 5.38E-06 | -1.44           | 5     | 1           |                      |                           |
| DMR1:250494901 | 1   | 250494901 | 900    | 1         | 6.19E-06 | -0.76           | 10    | 1.111111111 | A1cf                 |                           |
| DMR1:261805701 | 1   | 261805701 | 200    | 1         | 5.89E-07 | -2.17           | 0     | 0           | AABR07006873.1       |                           |
| DMR2:11533701  | 2   | 11533701  | 700    | 1         | 5.37E-06 | -1.66           | 2     | 0.285714286 |                      |                           |
| DMR2:12476301  | 2   | 12476301  | 600    | 1         | 8.95E-06 | -1.75           | 6     | 1           |                      |                           |
| DMR2:36610601  | 2   | 36610601  | 1000   | 1         | 4.40E-06 | -2              | 7     | 0.7         |                      |                           |
| DMR2:47039301  | 2   | 47039301  | 200    | 1         | 4.28E-06 | -2.23           | 2     | 1           | Itga2                | Signaling                 |
| DMR2:59777601  | 2   | 59777601  | 300    | 1         | 9.35E-06 | -1.63           | 2     | 0.666666667 |                      |                           |
| DMR2:75746901  | 2   | 75746901  | 100    | 1         | 6.58E-06 | 1.68            | 0     | 0           |                      |                           |
| DMR2:93558001  | 2   | 93558001  | 300    | 1         | 5.19E-06 | 2.04            | 9     | 3           |                      |                           |
| DMR2:111433501 | 2   | 111433501 | 200    | 1         | 7.51E-06 | -0.86           | 0     | 0           | Nlgn1                | Signaling                 |
| DMR2:113738301 | 2   | 113738301 | 800    | 1         | 7.70E-06 | -1.72           | 9     | 1.125       | Pld1                 | Metabolism                |
| DMR2:123564701 | 2   | 123564701 | 200    | 1         | 5.00E-07 | -1.45           | 1     | 0.5         | RGD1307100           |                           |
| DMR2:142431001 | 2   | 142431001 | 200    | 1         | 2.01E-06 | -1.75           | 3     | 1.5         | Lhfp16               |                           |
| DMR2:205445101 | 2   | 205445101 | 300    | 1         | 1.73E-06 | -1.31           | 5     | 1.666666667 | Nr1h5;RF00003        |                           |
| DMR2:232297401 | 2   | 232297401 | 1200   | 1         | 6.57E-06 | -1.04           | 18    | 1.5         |                      |                           |
| DMR3:3379601   | 3   | 3379601   | 1400   | 1         | 4.50E-06 | 1.49            | 11    | 0.785714286 | Camsap1;LOC108348142 |                           |
| DMR3:14306001  | 3   | 14306001  | 200    | 2         | 8.76E-07 | -2.51           | 2     | 1           | Cntrl;AABR07051508.2 |                           |
| DMR3:82286801  | 3   | 82286801  | 600    | 1         | 5.70E-06 | 1.42            | 8     | 1.333333333 | RF00001              |                           |
| DMR3:91502301  | 3   | 91502301  | 200    | 1         | 3.37E-06 | -1.93           | 2     | 1           |                      |                           |
| DMR3:93137901  | 3   | 93137901  | 1200   | 1         | 9.45E-06 | -1.18           | 7     | 0.583333333 |                      |                           |
| DMR3:117883201 | 3   | 117883201 | 1100   | 1         | 9.84E-06 | -2              | 16    | 1.454545455 |                      |                           |
| DMR3:124203301 | 3   | 124203301 | 500    | 1         | 1.93E-06 | 1.87            | 2     | 0.4         |                      |                           |
| DMR3:153369001 | 3   | 153369001 | 800    | 1         | 1.84E-06 | -2.39           | 13    | 1.625       | Mroh8                |                           |
| DMR3:166123501 | 3   | 166123501 | 300    | 1         | 1.38E-07 | -1.82           | 11    | 3.666666667 |                      |                           |
| DMR4:14860501  | 4   | 14860501  | 1300   | 1         | 9.05E-06 | -1.14           | 4     | 0.307692308 |                      |                           |
| DMR4:27302301  | 4   | 27302301  | 200    | 1         | 6.68E-06 | -1.97           | 0     | 0           | Akap9                | Signaling                 |
| DMR4:77943301  | 4   | 77943301  | 1800   | 1         | 6.67E-06 | -1.83           | 10    | 0.555555556 |                      |                           |
| DMR4:78635601  | 4   | 78635601  | 900    | 1         | 1.98E-06 | -1.39           | 7     | 0.777777778 | Svs1                 |                           |
| DMR4:107700501 | 4   | 107700501 | 1000   | 1         | 5.76E-06 | -1.42           | 4     | 0.4         |                      |                           |
| DMR4:123349601 | 4   | 123349601 | 200    | 1         | 3.59E-07 | -1.41           | 2     | 1           | lqsec1               | Signaling                 |
| DMR4:144603601 | 4   | 144603601 | 300    | 1         | 4.77E-06 | -1.71           | 4     | 1.333333333 | Rad18                | Transcription             |
| DMR5:2353201   | 5   | 2353201   | 200    | 1         | 9.84E-06 | -2              | 3     | 1.5         | AABR07046707.1       |                           |
| DMR5:57262501  | 5   | 57262501  | 300    | 1         | 4.81E-07 | -1.57           | 6     | 2           | Bag1;Chmp5           | Apoptosis;Binding Protein |
| DMR5:72038201  | 5   | 72038201  | 300    | 1         | 5.45E-06 | -0.98           | 4     | 1.333333333 |                      |                           |
| DMR5:132977601 | 5   | 132977601 | 200    | 1         | 7.10E-06 | -2.23           | 0     | 0           |                      |                           |
| DMR5:133063601 | 5   | 133063601 | 200    | 1         | 7.29E-06 | -1.61           | 1     | 0.5         | Skint10              |                           |
| DMR5:140528201 | 5   | 140528201 | 500    | 1         | 1.00E-05 | -1.24           | 10    | 2           | Ppt1                 | Metabolism                |
| DMR5:147555701 | 5   | 147555701 | 1900   | 1         | 2.51E-06 | -2.01           | 24    | 1.263157895 | Zbtb8os;Zbtb8a       |                           |
| DMR5:155861801 | 5   | 155861801 | 1100   | 1         | 6.11E-06 | 1.62            | 23    | 2.090909091 | AABR07073181.1       |                           |
| DMR5:155917701 | 5   | 155917701 | 900    | 1         | 7.72E-06 | -1.88           | 14    | 1.555555556 | Ldlrad2              | Receptor                  |
| DMR6:21927001  | 6   | 21927001  | 200    | 1         | 8.77E-08 | -1.55           | 3     | 1.5         |                      |                           |
| DMR6:52406301  | 6   | 52406301  | 300    | 1         | 3.49E-07 | -1.66           | 5     | 1.666666667 | Cdhr3                | Extracellular Matrix      |
| DMR6:93333801  | 6   | 93333801  | 200    | 1         | 6.67E-06 | -1.78           | 5     | 2.5         | Frdm6                | Signaling                 |
| DMR6:101225901 | 6   | 101225901 | 2000   | 1         | 2.73E-06 | -1.08           | 21    | 1.05        |                      |                           |
| DMR6:109509901 | 6   | 109509901 | 1500   | 1         | 4.07E-06 | -1.14           | 29    | 1.933333333 | Jdp2                 | Transcription             |
| DMR6:110109201 | 6   | 110109201 | 600    | 1         | 8.78E-06 | -1.1            | 8     | 1.333333333 | Gpatch2l             |                           |
| DMR6:128963001 | 6   | 128963001 | 600    | 1         | 2.73E-06 | 2.22            | 11    | 1.833333333 |                      |                           |
| DMR7:31507801  | 7   | 31507801  | 2300   | 1         | 5.03E-06 | -1.23           | 37    | 1.608695652 | Anks1b               | Transcription             |
| DMR7:35761101  | 7   | 35761101  | 200    | 1         | 5.15E-06 | -2.02           | 7     | 3.5         |                      |                           |

|                 |    |           |      |   |          |       |    |             |                             |                          |
|-----------------|----|-----------|------|---|----------|-------|----|-------------|-----------------------------|--------------------------|
| DMR7:61932101   | 7  | 61932101  | 1400 | 2 | 1.11E-07 | -1.74 | 22 | 1.571428571 |                             |                          |
| DMR7:66665001   | 7  | 66665001  | 800  | 2 | 2.59E-07 | -1.64 | 3  | 0.375       | Usp15;Snora19               | Proteolysis              |
| DMR7:74600601   | 7  | 74600601  | 200  | 1 | 2.87E-06 | 1.09  | 1  | 0.5         |                             |                          |
| DMR7:85581701   | 7  | 85581701  | 400  | 1 | 9.53E-06 | -1.08 | 2  | 0.5         |                             |                          |
| DMR7:100241601  | 7  | 100241601 | 1000 | 1 | 5.11E-06 | 1.64  | 12 | 1.2         |                             |                          |
| DMR7:102200001  | 7  | 102200001 | 200  | 1 | 7.17E-06 | -1.77 | 1  | 0.5         |                             |                          |
| DMR7:110170001  | 7  | 110170001 | 1300 | 1 | 2.09E-08 | -2.4  | 10 | 0.769230769 | Khdrbs3                     | Transcription            |
| DMR7:133934801  | 7  | 133934801 | 100  | 1 | 2.15E-06 | -3.07 | 3  | 3           | Pdzrn4                      |                          |
| DMR8:58901      | 8  | 58901     | 1000 | 1 | 1.65E-06 | -1.54 | 5  | 0.5         |                             |                          |
| DMR8:35720601   | 8  | 35720601  | 200  | 1 | 1.18E-06 | 1.49  | 2  | 1           |                             |                          |
| DMR8:59142801   | 8  | 59142801  | 200  | 1 | 7.53E-06 | -1.78 | 0  | 0           | Cib2                        | Signaling                |
| DMR8:94047101   | 8  | 94047101  | 200  | 1 | 3.17E-06 | -2.47 | 4  | 2           | Ube3d                       | Proteolysis              |
| DMR8:104398301  | 8  | 104398301 | 1900 | 1 | 4.73E-06 | -1.78 | 30 | 1.578947368 | AABR07071199.2              |                          |
| DMR8:117063901  | 8  | 117063901 | 100  | 1 | 5.46E-06 | -2.4  | 2  | 2           | Nicn1;Amt                   | Metabolism               |
| DMR9:58051601   | 9  | 58051601  | 200  | 1 | 5.86E-06 | -1.86 | 1  | 0.5         |                             |                          |
| DMR9:99856701   | 9  | 99856701  | 700  | 1 | 1.42E-07 | -1.64 | 13 | 1.857142857 |                             |                          |
| DMR9:100630401  | 9  | 100630401 | 400  | 1 | 2.02E-06 | -1.59 | 1  | 0.25        | Sept2;Hdlbp                 | Growth factor;Metabolism |
| DMR9:113577801  | 9  | 113577801 | 100  | 1 | 5.49E-06 | 1.34  | 1  | 1           | Ppp4r1;Ralbp1               | Signaling                |
| DMR9:116684201  | 9  | 116684201 | 800  | 2 | 4.77E-07 | -2.17 | 10 | 1.25        | AABR07068728.1              |                          |
| DMR9:121519801  | 9  | 121519801 | 1400 | 1 | 4.10E-06 | -1.78 | 6  | 0.428571429 |                             |                          |
| DMR10:23139801  | 10 | 23139801  | 400  | 1 | 1.46E-06 | -2.71 | 4  | 1           |                             |                          |
| DMR10:27158001  | 10 | 27158001  | 500  | 1 | 7.29E-06 | -1.36 | 7  | 1.4         | Gabrg2                      | Receptor                 |
| DMR10:44622301  | 10 | 44622301  | 500  | 1 | 7.61E-06 | -1.73 | 1  | 0.2         | Olr1448                     | Receptor                 |
| DMR10:61838901  | 10 | 61838901  | 1100 | 1 | 3.40E-07 | -1.64 | 5  | 0.454545455 | Smg6                        | Transcription            |
| DMR10:79953601  | 10 | 79953601  | 200  | 1 | 8.20E-06 | 1.97  | 0  | 0           |                             |                          |
| DMR10:84717401  | 10 | 84717401  | 600  | 1 | 1.45E-06 | -2.33 | 10 | 1.666666667 | AABR07072169.1;Copz2;Mir152 | Cytoskeleton             |
| DMR11:4294701   | 11 | 4294701   | 1700 | 1 | 5.43E-06 | -1.41 | 15 | 0.882352941 | Cadm2                       | Receptor                 |
| DMR11:11403101  | 11 | 11403101  | 200  | 1 | 2.16E-07 | -2.63 | 2  | 1           | Robo2                       | Receptor                 |
| DMR11:28047601  | 11 | 28047601  | 100  | 1 | 2.77E-06 | -1.94 | 1  | 1           | AABR07033570.2              |                          |
| DMR11:45179501  | 11 | 45179501  | 300  | 1 | 1.02E-06 | 2.26  | 5  | 1.666666667 |                             |                          |
| DMR11:59664201  | 11 | 59664201  | 200  | 1 | 7.96E-07 | -2.11 | 2  | 1           |                             |                          |
| DMR11:59857201  | 11 | 59857201  | 200  | 1 | 5.14E-06 | -1.72 | 3  | 1.5         |                             |                          |
| DMR11:68598201  | 11 | 68598201  | 200  | 1 | 9.00E-06 | -1.55 | 2  | 1           | RF00003                     |                          |
| DMR11:80106501  | 11 | 80106501  | 200  | 1 | 4.73E-06 | -1.81 | 1  | 0.5         |                             |                          |
| DMR12:7911901   | 12 | 7911901   | 300  | 1 | 9.33E-06 | -1.01 | 4  | 1.333333333 | Ubl3                        | Metabolism               |
| DMR12:17745501  | 12 | 17745501  | 2700 | 1 | 4.96E-06 | -1.55 | 45 | 1.666666667 | Pdgfa                       | Growth factor            |
| DMR12:28827201  | 12 | 28827201  | 900  | 1 | 3.30E-06 | -2.21 | 9  | 1           | AABR07035946.1              |                          |
| DMR13:7796101   | 13 | 7796101   | 400  | 1 | 6.89E-06 | -2.64 | 0  | 0           |                             |                          |
| DMR13:23129601  | 13 | 23129601  | 200  | 1 | 8.98E-06 | 1.47  | 2  | 1           |                             |                          |
| DMR13:24705301  | 13 | 24705301  | 100  | 1 | 2.99E-06 | 2.06  | 0  | 0           |                             |                          |
| DMR13:34339901  | 13 | 34339901  | 800  | 1 | 4.17E-06 | -1.41 | 4  | 0.5         |                             |                          |
| DMR13:81371901  | 13 | 81371901  | 700  | 1 | 6.86E-06 | 2.14  | 9  | 1.285714286 |                             |                          |
| DMR13:105439601 | 13 | 105439601 | 1000 | 1 | 8.91E-06 | -1.22 | 18 | 1.8         |                             |                          |
| DMR13:112772901 | 13 | 112772901 | 100  | 1 | 9.61E-06 | -2.84 | 1  | 1           |                             |                          |
| DMR14:13482401  | 14 | 13482401  | 1500 | 1 | 3.16E-07 | -1.27 | 5  | 0.333333333 |                             |                          |
| DMR14:13682601  | 14 | 13682601  | 400  | 1 | 4.68E-07 | -1.28 | 0  | 0           |                             |                          |
| DMR14:76584001  | 14 | 76584001  | 200  | 1 | 1.12E-06 | -2.72 | 3  | 1.5         |                             |                          |
| DMR14:86847801  | 14 | 86847801  | 200  | 1 | 4.50E-06 | -1.09 | 5  | 2.5         | Ccm2                        | Development              |
| DMR15:53531701  | 15 | 53531701  | 300  | 1 | 3.83E-08 | -1.85 | 5  | 1.666666667 |                             |                          |
| DMR15:71587501  | 15 | 71587501  | 300  | 1 | 5.59E-06 | -1.34 | 1  | 0.333333333 |                             |                          |
| DMR15:79183301  | 15 | 79183301  | 300  | 1 | 4.20E-06 | -1.8  | 0  | 0           |                             |                          |
| DMR15:87576201  | 15 | 87576201  | 100  | 1 | 5.95E-06 | -2.05 | 0  | 0           | Mycbp2                      | Metabolism               |
| DMR15:99604601  | 15 | 99604601  | 200  | 1 | 8.89E-06 | -0.93 | 2  | 1           |                             |                          |
| DMR15:101664001 | 15 | 101664001 | 200  | 1 | 5.08E-06 | 0.99  | 4  | 2           |                             |                          |
| DMR16:12727301  | 16 | 12727301  | 300  | 1 | 1.91E-06 | -1.6  | 2  | 0.666666667 | LOC100911649                | Unknown                  |
| DMR16:23876101  | 16 | 23876101  | 300  | 1 | 7.62E-07 | -1.49 | 4  | 1.333333333 |                             |                          |
| DMR16:27540301  | 16 | 27540301  | 200  | 1 | 2.47E-06 | -1.58 | 2  | 1           | Tll1                        | Protease                 |
| DMR16:32635201  | 16 | 32635201  | 500  | 1 | 2.55E-06 | -1.93 | 18 | 3.6         |                             |                          |
| DMR16:59771901  | 16 | 59771901  | 1300 | 1 | 5.40E-06 | -0.96 | 20 | 1.538461538 |                             |                          |
| DMR16:81133501  | 16 | 81133501  | 300  | 1 | 6.32E-06 | -1.74 | 2  | 0.666666667 | Tfdp1;Atp4b                 | Transcription;Transport  |
| DMR17:3264101   | 17 | 3264101   | 600  | 1 | 7.74E-06 | -0.86 | 3  | 0.5         |                             |                          |
| DMR17:5657701   | 17 | 5657701   | 1600 | 1 | 5.24E-06 | -1.4  | 21 | 1.3125      | AABR07026936.3              |                          |
| DMR18:57662901  | 18 | 57662901  | 100  | 1 | 5.10E-06 | 2.18  | 2  | 2           | Htr4                        | Receptor                 |
| DMR18:64867701  | 18 | 64867701  | 300  | 1 | 6.23E-06 | 1.75  | 6  | 2           |                             |                          |

|                |    |           |      |   |          |       |    |             |              |                      |
|----------------|----|-----------|------|---|----------|-------|----|-------------|--------------|----------------------|
| DMR19:6201401  | 19 | 6201401   | 600  | 1 | 7.53E-06 | -1.73 | 1  | 0.166666667 | Cdh8         | Extracellular Matrix |
| DMR19:40304601 | 19 | 40304601  | 300  | 1 | 4.67E-06 | -1.17 | 3  | 1           |              |                      |
| DMR19:47603501 | 19 | 47603501  | 1200 | 2 | 1.83E-06 | -2.54 | 23 | 1.916666667 |              |                      |
| DMR19:57987501 | 19 | 57987501  | 500  | 1 | 3.48E-06 | -1.69 | 13 | 2.6         | Disc1        |                      |
| DMR20:24565801 | 20 | 24565801  | 400  | 1 | 4.19E-06 | -0.93 | 1  | 0.25        |              |                      |
| DMR20:26805301 | 20 | 26805301  | 100  | 1 | 8.58E-06 | -2.05 | 0  | 0           | Herc4        | Metabolism           |
| DMRX:6835301   | X  | 6835301   | 1300 | 1 | 1.83E-07 | -1.2  | 11 | 0.846153846 |              |                      |
| DMRX:39511001  | X  | 39511001  | 2000 | 1 | 5.82E-06 | -1.09 | 18 | 0.9         |              |                      |
| DMRX:55150401  | X  | 55150401  | 200  | 1 | 4.97E-06 | -1.79 | 2  | 1           |              |                      |
| DMRX:80396301  | X  | 80396301  | 1700 | 1 | 8.48E-06 | -1.45 | 21 | 1.235294118 |              |                      |
| DMRX:118280701 | X  | 118280701 | 200  | 1 | 6.95E-06 | -1.66 | 2  | 1           | Mir448;Htr2c | Receptor             |
| DMRX:137758901 | X  | 137758901 | 200  | 1 | 1.03E-06 | -1.62 | 8  | 4           |              |                      |
