# Supplementary material for: Vinclozolin induced epigenetic transgenerational inheritance of pathologies and sperm epimutation biomarkers for specific diseases
Source: PubMed Central journal article supplement (PMC6114855; doi:10.1371/journal.pone.0202662), 2018-08-29
Supplement: pone.0202662.s006.pdf [file pone.0202662.s006.pdf]

**Supplemental Table S5**  
**Prostate Disease DMR Signature List**

| DMR Name       | Chr | Start     | Length | # Sig Win | minP     | Log Fold Change | CpG # | CpG Density | Gene Annotation      | Gene Category |
|----------------|-----|-----------|--------|-----------|----------|-----------------|-------|-------------|----------------------|---------------|
| DMR1:18191401  | 1   | 18191401  | 600    | 1         | 4.72E-06 | -1.9            | 2     | 0.333333333 |                      |               |
| DMR1:45719301  | 1   | 45719301  | 200    | 1         | 9.02E-06 | 2               | 3     | 1.5         |                      |               |
| DMR1:51934101  | 1   | 51934101  | 1700   | 1         | 1.48E-06 | -2.05           | 19    | 1.117647059 |                      |               |
| DMR1:52097501  | 1   | 52097501  | 200    | 1         | 4.46E-06 | -1.65           | 1     | 0.5         |                      |               |
| DMR1:53191901  | 1   | 53191901  | 1800   | 1         | 9.64E-06 | 1.2             | 21    | 1.166666667 | Rnaset2              | Translation   |
| DMR1:59254901  | 1   | 59254901  | 400    | 1         | 7.36E-06 | -0.86           | 2     | 0.5         |                      |               |
| DMR1:72617001  | 1   | 72617001  | 400    | 1         | 6.26E-07 | -1.21           | 1     | 0.25        | Rpl28;AABR07071876.1 | Transcription |
| DMR1:81097101  | 1   | 81097101  | 2000   | 1         | 9.83E-06 | 1.95            | 35    | 1.75        | AC118165.1           |               |
| DMR1:86584201  | 1   | 86584201  | 300    | 1         | 4.38E-06 | -0.9            | 4     | 1.333333333 |                      |               |
| DMR1:100540501 | 1   | 100540501 | 800    | 1         | 8.53E-07 | 1.11            | 14    | 1.75        | Spib;Pold1           | Transcription |
| DMR1:114757701 | 1   | 114757701 | 600    | 1         | 9.16E-06 | -0.97           | 2     | 0.333333333 | Oca2                 | Transport     |
| DMR1:123245201 | 1   | 123245201 | 200    | 1         | 1.42E-06 | -1.86           | 2     | 1           |                      |               |
| DMR1:140130301 | 1   | 140130301 | 1300   | 1         | 1.48E-06 | 2.19            | 10    | 0.769230769 | Ntrk3                | Receptor      |
| DMR1:140506501 | 1   | 140506501 | 1500   | 1         | 1.39E-06 | -0.89           | 27    | 1.8         |                      |               |
| DMR1:154446601 | 1   | 154446601 | 200    | 1         | 2.04E-06 | -1.61           | 0     | 0           | Picalm               | Transport     |
| DMR1:155532701 | 1   | 155532701 | 1500   | 1         | 8.97E-06 | -1.28           | 3     | 0.2         |                      |               |
| DMR1:160809501 | 1   | 160809501 | 100    | 1         | 3.88E-06 | -2.36           | 1     | 1           |                      |               |
| DMR1:161748001 | 1   | 161748001 | 400    | 1         | 4.60E-06 | -0.91           | 6     | 1.5         | Tenm4                | Receptor      |
| DMR1:172507701 | 1   | 172507701 | 2500   | 1         | 2.76E-06 | -1.64           | 8     | 0.32        | AC127217.1           |               |
| DMR1:177476401 | 1   | 177476401 | 300    | 1         | 8.37E-06 | -1.35           | 8     | 2.666666667 |                      |               |
| DMR1:178653201 | 1   | 178653201 | 400    | 1         | 6.44E-07 | -1.1            | 3     | 0.75        | Spon1                | Growth factor |
| DMR1:179664501 | 1   | 179664501 | 2300   | 1         | 6.92E-06 | -0.77           | 18    | 0.782608696 |                      |               |
| DMR1:183452701 | 1   | 183452701 | 300    | 1         | 4.38E-06 | -0.98           | 3     | 1           |                      |               |
| DMR1:194047301 | 1   | 194047301 | 500    | 1         | 3.18E-06 | -1.3            | 4     | 0.8         |                      |               |
| DMR1:197371501 | 1   | 197371501 | 700    | 1         | 2.17E-07 | -1.22           | 12    | 1.714285714 |                      |               |
| DMR1:210215101 | 1   | 210215101 | 300    | 1         | 4.49E-07 | 1.53            | 1     | 0.333333333 |                      |               |
| DMR1:218931901 | 1   | 218931901 | 100    | 1         | 1.22E-07 | -2.66           | 1     | 1           |                      |               |
| DMR1:241357601 | 1   | 241357601 | 3000   | 1         | 7.10E-06 | -1.16           | 25    | 0.833333333 | RGD1560242           |               |
| DMR1:247842701 | 1   | 247842701 | 200    | 1         | 7.71E-06 | -1.53           | 2     | 1           |                      |               |
| DMR1:263138401 | 1   | 263138401 | 300    | 1         | 7.99E-06 | -1.54           | 5     | 1.666666667 |                      |               |
| DMR1:263551801 | 1   | 263551801 | 300    | 1         | 8.90E-06 | 1.17            | 9     | 3           | Abcc2                | Transport     |
| DMR2:7601701   | 2   | 7601701   | 300    | 1         | 7.21E-07 | -1.24           | 1     | 0.333333333 |                      |               |
| DMR2:24206101  | 2   | 24206101  | 200    | 1         | 5.46E-06 | -1.73           | 3     | 1.5         | Ap3b1;AABR07007690.1 | Transport     |
| DMR2:29833601  | 2   | 29833601  | 300    | 1         | 7.22E-06 | -1.35           | 2     | 0.666666667 |                      |               |
| DMR2:37567901  | 2   | 37567901  | 700    | 1         | 6.03E-06 | -1              | 3     | 0.428571429 |                      |               |
| DMR2:40711501  | 2   | 40711501  | 300    | 1         | 9.10E-06 | -1.24           | 3     | 1           | Pde4d                | Metabolism    |
| DMR2:50738801  | 2   | 50738801  | 400    | 1         | 6.27E-06 | 1.12            | 2     | 0.5         |                      |               |
| DMR2:55980901  | 2   | 55980901  | 300    | 1         | 2.58E-07 | -1.08           | 4     | 1.333333333 | Fyb1                 |               |
| DMR2:56528801  | 2   | 56528801  | 200    | 1         | 3.42E-06 | -2.52           | 5     | 2.5         | Egflam               |               |
| DMR2:90057501  | 2   | 90057501  | 800    | 1         | 1.34E-06 | -0.55           | 2     | 0.25        |                      |               |
| DMR2:105238101 | 2   | 105238101 | 400    | 1         | 8.64E-06 | -0.8            | 4     | 1           |                      |               |
| DMR2:108235501 | 2   | 108235501 | 300    | 1         | 6.92E-06 | -1.26           | 4     | 1.333333333 |                      |               |
| DMR2:112021301 | 2   | 112021301 | 400    | 1         | 2.49E-07 | -1.17           | 1     | 0.25        | AABR07009775.1       |               |
| DMR2:112783301 | 2   | 112783301 | 1800   | 1         | 8.30E-06 | -0.88           | 18    | 1           | Ect2;RF00560         | Signaling     |
| DMR2:116671201 | 2   | 116671201 | 1200   | 1         | 8.73E-06 | -1.39           | 12    | 1           |                      |               |
| DMR2:125172601 | 2   | 125172601 | 400    | 1         | 1.32E-06 | -1.18           | 2     | 0.5         |                      |               |
| DMR2:125906701 | 2   | 125906701 | 600    | 1         | 6.99E-06 | -0.66           | 4     | 0.666666667 |                      |               |
| DMR2:126061201 | 2   | 126061201 | 1300   | 1         | 6.12E-06 | -0.88           | 7     | 0.538461538 |                      |               |
| DMR2:135058701 | 2   | 135058701 | 200    | 1         | 9.89E-06 | -1.15           | 0     | 0           |                      |               |
| DMR2:137172501 | 2   | 137172501 | 200    | 1         | 3.56E-06 | -1.19           | 2     | 1           |                      |               |
| DMR2:145808101 | 2   | 145808101 | 500    | 1         | 1.39E-07 | -0.7            | 2     | 0.4         |                      |               |
| DMR2:148189401 | 2   | 148189401 | 200    | 1         | 6.22E-06 | -0.82           | 2     | 1           |                      |               |
| DMR2:170767401 | 2   | 170767401 | 200    | 1         | 2.62E-06 | -1.21           | 3     | 1.5         |                      |               |
| DMR2:181351301 | 2   | 181351301 | 200    | 1         | 7.16E-06 | -1.24           | 2     | 1           | Map9                 |               |
| DMR2:184373201 | 2   | 184373201 | 400    | 1         | 5.26E-06 | -0.97           | 5     | 1.25        |                      |               |
| DMR2:209038101 | 2   | 209038101 | 1300   | 1         | 4.72E-06 | -1.94           | 5     | 0.384615385 |                      |               |
| DMR2:210587301 | 2   | 210587301 | 500    | 1         | 2.70E-06 | -1.3            | 9     | 1.8         |                      |               |
| DMR2:219230601 | 2   | 219230601 | 500    | 1         | 4.74E-06 | -1.1            | 4     | 0.8         |                      |               |
| DMR2:225886501 | 2   | 225886501 | 1000   | 1         | 7.69E-06 | -1.31           | 10    | 1           |                      |               |

|                |   |           |      |   |          |       |    |             |                               |                      |
|----------------|---|-----------|------|---|----------|-------|----|-------------|-------------------------------|----------------------|
| DMR2:228921901 | 2 | 228921901 | 400  | 1 | 6.82E-06 | -1.19 | 1  | 0.25        |                               |                      |
| DMR2:235992301 | 2 | 235992301 | 600  | 1 | 6.71E-06 | -0.61 | 14 | 2.333333333 |                               |                      |
| DMR2:236801901 | 2 | 236801901 | 300  | 1 | 5.30E-06 | -0.98 | 6  | 2           |                               |                      |
| DMR2:241690501 | 2 | 241690501 | 800  | 1 | 4.61E-06 | -0.93 | 6  | 0.75        |                               |                      |
| DMR2:242350601 | 2 | 242350601 | 200  | 1 | 5.86E-06 | -1.37 | 2  | 1           |                               |                      |
| DMR2:247488901 | 2 | 247488901 | 200  | 1 | 1.75E-06 | -2.32 | 5  | 2.5         |                               |                      |
| DMR2:257748901 | 2 | 257748901 | 1000 | 1 | 6.26E-06 | -0.8  | 31 | 3.1         | Ak5                           | Signaling            |
| DMR3:586501    | 3 | 586501    | 300  | 1 | 9.54E-06 | -2.03 | 2  | 0.666666667 |                               |                      |
| DMR3:4437701   | 3 | 4437701   | 300  | 1 | 9.30E-06 | -1.4  | 2  | 0.666666667 |                               |                      |
| DMR3:10986901  | 3 | 10986901  | 1000 | 1 | 5.46E-06 | -2.24 | 17 | 1.7         |                               |                      |
| DMR3:11496501  | 3 | 11496501  | 200  | 1 | 3.19E-06 | -1.32 | 3  | 1.5         |                               |                      |
| DMR3:27814301  | 3 | 27814301  | 400  | 1 | 9.13E-06 | -1.15 | 4  | 1           |                               |                      |
| DMR3:37809101  | 3 | 37809101  | 300  | 1 | 1.10E-06 | 1.32  | 9  | 3           | Neb                           | Cytoskeleton         |
| DMR3:38208201  | 3 | 38208201  | 300  | 1 | 3.60E-06 | -2.32 | 3  | 1           |                               |                      |
| DMR3:51331801  | 3 | 51331801  | 400  | 1 | 3.64E-06 | 1.21  | 8  | 2           |                               |                      |
| DMR3:60927201  | 3 | 60927201  | 800  | 1 | 2.43E-06 | -0.87 | 7  | 0.875       |                               |                      |
| DMR3:67683301  | 3 | 67683301  | 1400 | 1 | 9.80E-06 | -1.21 | 18 | 1.285714286 | AABR07052643.1                |                      |
| DMR3:72799801  | 3 | 72799801  | 1300 | 1 | 9.78E-06 | 1.716 | 12 | 0.923076923 | Olr441                        |                      |
| DMR3:83052201  | 3 | 83052201  | 1100 | 1 | 1.31E-06 | -0.84 | 13 | 1.181818182 | Hsd17b12;AABR0705289          | Metabolism           |
| DMR3:89871701  | 3 | 89871701  | 600  | 1 | 7.48E-06 | -1.35 | 4  | 0.666666667 |                               |                      |
| DMR3:91919601  | 3 | 91919601  | 300  | 1 | 3.70E-06 | -0.97 | 7  | 2.333333333 |                               |                      |
| DMR3:117758801 | 3 | 117758801 | 200  | 1 | 1.78E-07 | -1.46 | 6  | 3           | Fbn1;AABR07053635.1           | Development          |
| DMR3:124050701 | 3 | 124050701 | 600  | 1 | 3.72E-06 | -0.68 | 2  | 0.333333333 |                               |                      |
| DMR3:124979001 | 3 | 124979001 | 1400 | 1 | 3.23E-06 | -1.28 | 20 | 1.428571429 |                               |                      |
| DMR3:138848401 | 3 | 138848401 | 200  | 1 | 4.82E-06 | -1.37 | 3  | 1.5         | Dtd1                          | Transcription        |
| DMR3:141217601 | 3 | 141217601 | 500  | 1 | 8.19E-06 | -0.71 | 6  | 1.2         | Xrn2                          | Transcription        |
| DMR3:157687501 | 3 | 157687501 | 300  | 1 | 1.94E-06 | -1.15 | 5  | 1.666666667 | Ptptr                         | Receptor             |
| DMR3:166298501 | 3 | 166298501 | 400  | 1 | 3.79E-06 | -0.68 | 13 | 3.25        | AABR07054662.2                |                      |
| DMR3:171931601 | 3 | 171931601 | 1000 | 1 | 1.52E-06 | 1.38  | 12 | 1.2         | AABR07054850.1                |                      |
| DMR4:355401    | 4 | 355401    | 1200 | 1 | 1.47E-06 | -0.56 | 10 | 0.833333333 | Insig1                        | Signaling            |
| DMR4:1902701   | 4 | 1902701   | 300  | 1 | 1.81E-07 | -1.24 | 0  | 0           |                               |                      |
| DMR4:3300801   | 4 | 3300801   | 400  | 1 | 1.43E-06 | -1.2  | 3  | 0.75        |                               |                      |
| DMR4:10715801  | 4 | 10715801  | 400  | 1 | 6.00E-06 | -2.07 | 5  | 1.25        |                               |                      |
| DMR4:23807301  | 4 | 23807301  | 100  | 1 | 6.11E-06 | 1.71  | 2  | 2           |                               |                      |
| DMR4:29218101  | 4 | 29218101  | 1500 | 1 | 6.33E-06 | 2.04  | 6  | 0.4         |                               |                      |
| DMR4:36234401  | 4 | 36234401  | 300  | 1 | 4.46E-06 | -1.73 | 1  | 0.333333333 |                               |                      |
| DMR4:40894001  | 4 | 40894001  | 400  | 1 | 8.88E-06 | -0.67 | 5  | 1.25        | RF00100                       |                      |
| DMR4:45715201  | 4 | 45715201  | 200  | 1 | 4.49E-06 | -1.13 | 4  | 2           |                               |                      |
| DMR4:51231201  | 4 | 51231201  | 400  | 1 | 5.40E-06 | -1.13 | 3  | 0.75        |                               |                      |
| DMR4:53101901  | 4 | 53101901  | 700  | 1 | 5.10E-06 | -0.99 | 8  | 1.142857143 |                               |                      |
| DMR4:53847501  | 4 | 53847501  | 1300 | 1 | 1.35E-06 | -0.85 | 7  | 0.538461538 |                               |                      |
| DMR4:61293201  | 4 | 61293201  | 400  | 1 | 2.01E-06 | -1.6  | 2  | 0.5         | Exoc4                         | Transport            |
| DMR4:68874901  | 4 | 68874901  | 200  | 1 | 1.83E-06 | -2.14 | 3  | 1.5         | Mgam                          | Metabolism           |
| DMR4:83554301  | 4 | 83554301  | 1600 | 1 | 7.93E-06 | -1.78 | 13 | 0.8125      | Creb5                         | Transcription        |
| DMR4:86329401  | 4 | 86329401  | 1100 | 1 | 6.22E-06 | -1.2  | 39 | 3.545454545 |                               |                      |
| DMR4:99664301  | 4 | 99664301  | 400  | 1 | 9.05E-06 | -0.55 | 5  | 1.25        | Reep1                         | Receptor             |
| DMR4:101323901 | 4 | 101323901 | 600  | 2 | 5.05E-07 | -1.04 | 9  | 1.5         | AABR07060930.1                |                      |
| DMR4:105976501 | 4 | 105976501 | 700  | 1 | 1.32E-06 | 1.75  | 2  | 0.285714286 |                               |                      |
| DMR4:130358601 | 4 | 130358601 | 500  | 1 | 1.55E-06 | -0.99 | 5  | 1           | Mitf                          | Transcription        |
| DMR4:152691501 | 4 | 152691501 | 500  | 1 | 6.55E-06 | -0.9  | 10 | 2           | Ninj2                         | Extracellular Matrix |
| DMR4:164655901 | 4 | 164655901 | 1600 | 1 | 5.98E-06 | -1.7  | 7  | 0.4375      | Ly49s4;Ly49i4                 | Receptor             |
| DMR4:167153701 | 4 | 167153701 | 300  | 1 | 4.71E-06 | -1.44 | 1  | 0.333333333 | Tas2r116;Tas2r123             |                      |
| DMR4:176910501 | 4 | 176910501 | 1200 | 1 | 5.77E-06 | -1.16 | 11 | 0.916666667 | Abcc9                         | Receptor             |
| DMR4:178696801 | 4 | 178696801 | 200  | 1 | 6.33E-06 | 1.31  | 3  | 1.5         |                               |                      |
| DMR4:182368201 | 4 | 182368201 | 500  | 1 | 5.20E-07 | -0.74 | 2  | 0.4         |                               |                      |
| DMR5:11104501  | 5 | 11104501  | 200  | 1 | 5.24E-07 | -0.9  | 11 | 5.5         |                               |                      |
| DMR5:11940801  | 5 | 11940801  | 400  | 1 | 4.74E-06 | -0.9  | 1  | 0.25        |                               |                      |
| DMR5:14360301  | 5 | 14360301  | 300  | 1 | 2.67E-06 | -1.21 | 2  | 0.666666667 | Atp6v1h                       | Transport            |
| DMR5:17194701  | 5 | 17194701  | 200  | 1 | 5.48E-06 | 1.76  | 1  | 0.5         |                               |                      |
| DMR5:18790301  | 5 | 18790301  | 1400 | 1 | 8.01E-06 | -1.13 | 19 | 1.357142857 |                               |                      |
| DMR5:22263201  | 5 | 22263201  | 100  | 1 | 6.66E-06 | -1.64 | 1  | 1           | AABR07047174.3;AABR07047174.1 |                      |
| DMR5:41454501  | 5 | 41454501  | 200  | 1 | 1.50E-06 | -1.09 | 0  | 0           |                               |                      |
| DMR5:52380401  | 5 | 52380401  | 200  | 1 | 2.88E-06 | -1.13 | 1  | 0.5         |                               |                      |

|                |   |           |      |   |          |       |    |             |                       |                          |
|----------------|---|-----------|------|---|----------|-------|----|-------------|-----------------------|--------------------------|
| DMR5:54544401  | 5 | 54544401  | 300  | 1 | 9.80E-06 | -1.63 | 3  | 1           |                       |                          |
| DMR5:59352001  | 5 | 59352001  | 400  | 1 | 1.71E-06 | -1.48 | 5  | 1.25        | Reck                  | Signaling                |
| DMR5:72853301  | 5 | 72853301  | 900  | 1 | 5.05E-06 | -0.59 | 11 | 1.222222222 |                       |                          |
| DMR5:74677201  | 5 | 74677201  | 1200 | 1 | 1.32E-07 | -2.13 | 16 | 1.333333333 | Palm2                 |                          |
| DMR5:76060901  | 5 | 76060901  | 300  | 1 | 5.91E-06 | -0.73 | 4  | 1.333333333 |                       |                          |
| DMR5:77388201  | 5 | 77388201  | 1200 | 1 | 4.72E-06 | -1.22 | 6  | 0.5         | LOC259244;Mup4;AABR0  | Immune response          |
| DMR5:118499401 | 5 | 118499401 | 300  | 1 | 2.88E-06 | -1.1  | 2  | 0.666666667 | Itgb3bp;RF00026       | Receptor                 |
| DMR5:118717701 | 5 | 118717701 | 600  | 1 | 1.04E-06 | -1.99 | 3  | 0.5         | Efcab7                | Metabolism               |
| DMR5:122580201 | 5 | 122580201 | 100  | 1 | 1.35E-06 | -2.35 | 1  | 1           | Wdr78                 | Cytoskeleton             |
| DMR5:131648601 | 5 | 131648601 | 1100 | 1 | 3.48E-06 | 1.82  | 8  | 0.727272727 |                       |                          |
| DMR5:135058801 | 5 | 135058801 | 1200 | 1 | 2.43E-06 | -1.51 | 9  | 0.75        |                       |                          |
| DMR5:137685601 | 5 | 137685601 | 3100 | 1 | 8.43E-06 | -1.59 | 33 | 1.064516129 |                       |                          |
| DMR5:146188901 | 5 | 146188901 | 1000 | 1 | 1.25E-07 | -0.51 | 12 | 1.2         |                       |                          |
| DMR5:146771001 | 5 | 146771001 | 2100 | 1 | 9.32E-06 | -0.68 | 29 | 1.380952381 | Zscan20               | Transcription            |
| DMR5:150848901 | 5 | 150848901 | 300  | 1 | 1.73E-06 | 0.98  | 7  | 2.333333333 | Eya3                  | Metabolism               |
| DMR5:156474701 | 5 | 156474701 | 300  | 1 | 4.83E-06 | -0.93 | 3  | 1           | Eif4g3                | Transcription            |
| DMR5:158699401 | 5 | 158699401 | 700  | 1 | 8.68E-06 | 1.19  | 21 | 3           | AABR07050265.1        |                          |
| DMR5:166967901 | 5 | 166967901 | 600  | 1 | 2.40E-06 | -1.11 | 9  | 1.5         |                       |                          |
| DMR5:167010301 | 5 | 167010301 | 700  | 1 | 2.98E-06 | -1.19 | 13 | 1.857142857 | H6pd                  | Metabolism               |
| DMR5:170058001 | 5 | 170058001 | 1000 | 1 | 5.80E-06 | -0.45 | 5  | 0.5         |                       |                          |
| DMR5:170857901 | 5 | 170857901 | 400  | 2 | 2.03E-06 | -0.52 | 6  | 1.5         |                       |                          |
| DMR5:172398201 | 5 | 172398201 | 3200 | 1 | 1.19E-06 | -0.67 | 51 | 1.59375     | Pfich2                | Metabolism               |
| DMR6:3008001   | 6 | 3008001   | 300  | 1 | 1.72E-07 | -1.39 | 3  | 1           | Arhgef33              |                          |
| DMR6:4852601   | 6 | 4852601   | 300  | 1 | 7.51E-06 | -0.78 | 3  | 1           |                       |                          |
| DMR6:10809101  | 6 | 10809101  | 1900 | 1 | 6.33E-06 | -0.75 | 84 | 4.421052632 |                       |                          |
| DMR6:25884201  | 6 | 25884201  | 400  | 2 | 2.40E-07 | -1.29 | 5  | 1.25        | Babam2                |                          |
| DMR6:45791701  | 6 | 45791701  | 2700 | 1 | 9.98E-06 | -1.08 | 22 | 0.814814815 |                       |                          |
| DMR6:53581301  | 6 | 53581301  | 300  | 1 | 8.95E-06 | -1.64 | 5  | 1.666666667 | Hdac9                 |                          |
| DMR6:54022801  | 6 | 54022801  | 300  | 1 | 7.99E-06 | -1.21 | 6  | 2           | Hdac9                 |                          |
| DMR6:87207501  | 6 | 87207501  | 3300 | 1 | 3.62E-06 | -1    | 30 | 0.909090909 | RF00560               |                          |
| DMR6:87641901  | 6 | 87641901  | 300  | 1 | 5.86E-06 | -1.23 | 4  | 1.333333333 |                       |                          |
| DMR6:89070201  | 6 | 89070201  | 200  | 1 | 5.99E-06 | -1.45 | 2  | 1           |                       |                          |
| DMR6:93651701  | 6 | 93651701  | 1200 | 1 | 3.09E-06 | -1.5  | 16 | 1.333333333 | AC128303.1;LOC690035  |                          |
| DMR6:94796001  | 6 | 94796001  | 800  | 1 | 5.13E-06 | -0.84 | 13 | 1.625       |                       |                          |
| DMR6:101081701 | 6 | 101081701 | 200  | 1 | 9.18E-06 | -0.98 | 3  | 1.5         |                       |                          |
| DMR6:106690301 | 6 | 106690301 | 1200 | 1 | 3.74E-06 | -1.25 | 15 | 1.25        |                       |                          |
| DMR6:109368001 | 6 | 109368001 | 1200 | 1 | 3.00E-06 | 1.72  | 17 | 1.416666667 |                       |                          |
| DMR6:128080301 | 6 | 128080301 | 1200 | 1 | 8.78E-06 | 1.29  | 20 | 1.666666667 | LOC500712;RF00560     |                          |
| DMR6:128236601 | 6 | 128236601 | 900  | 1 | 3.62E-06 | -1.19 | 15 | 1.666666667 |                       |                          |
| DMR6:128867901 | 6 | 128867901 | 200  | 1 | 9.39E-07 | -1    | 3  | 1.5         |                       |                          |
| DMR6:134522301 | 6 | 134522301 | 700  | 1 | 4.79E-06 | 1.69  | 14 | 2           |                       |                          |
| DMR7:11891601  | 7 | 11891601  | 400  | 1 | 4.78E-06 | -1.03 | 3  | 0.75        | Mob3a                 |                          |
| DMR7:14936001  | 7 | 14936001  | 200  | 1 | 6.88E-06 | -1.28 | 1  | 0.5         |                       |                          |
| DMR7:20859201  | 7 | 20859201  | 700  | 1 | 5.67E-06 | -0.53 | 5  | 0.714285714 | AABR07056183.1        |                          |
| DMR7:21176901  | 7 | 21176901  | 400  | 1 | 9.21E-06 | -0.38 | 3  | 0.75        |                       |                          |
| DMR7:23583401  | 7 | 23583401  | 800  | 1 | 7.07E-06 | 1.48  | 15 | 1.875       | Syn3;Timp3            | Development;Proteolysis  |
| DMR7:26035401  | 7 | 26035401  | 200  | 1 | 1.90E-06 | -1.09 | 3  | 1.5         |                       |                          |
| DMR7:29010401  | 7 | 29010401  | 400  | 1 | 2.51E-06 | -0.75 | 3  | 0.75        | Gnptab                | Transcription            |
| DMR7:33760701  | 7 | 33760701  | 1100 | 1 | 6.99E-06 | -0.81 | 26 | 2.363636364 | AABR07056633.1        |                          |
| DMR7:34870501  | 7 | 34870501  | 1400 | 1 | 9.77E-06 | -1    | 16 | 1.142857143 | AABR07073295.1;Mir331 |                          |
| DMR7:47310201  | 7 | 47310201  | 300  | 1 | 5.83E-06 | -0.85 | 3  | 1           | Tmtc2                 | Unknown                  |
| DMR7:47403201  | 7 | 47403201  | 100  | 1 | 8.58E-06 | -2.21 | 2  | 2           | Tmtc2                 | Unknown                  |
| DMR7:59550801  | 7 | 59550801  | 800  | 1 | 3.92E-06 | -1.31 | 7  | 0.875       | Cnot2                 | Transcription            |
| DMR7:70837701  | 7 | 70837701  | 2800 | 1 | 1.16E-06 | -0.51 | 59 | 2.107142857 | Shmt2;Nxph4;Lrp1      | Metabolism;Signaling;Rec |
| DMR7:71675201  | 7 | 71675201  | 500  | 1 | 9.82E-07 | -1.11 | 8  | 1.6         | Sdc2                  | Extracellular Matrix     |
| DMR7:73124301  | 7 | 73124301  | 900  | 1 | 2.26E-07 | -1.32 | 4  | 0.444444444 | Matn2;AABR07057475.1  | Cytoskeleton             |
| DMR7:74646401  | 7 | 74646401  | 700  | 1 | 1.98E-06 | -0.82 | 13 | 1.857142857 |                       |                          |
| DMR7:87841901  | 7 | 87841901  | 400  | 1 | 1.00E-06 | -1.33 | 7  | 1.75        | AABR07057765.1        |                          |
| DMR7:95378401  | 7 | 95378401  | 100  | 1 | 4.50E-06 | 1.84  | 0  | 0           | Mtbp                  |                          |
| DMR7:107150801 | 7 | 107150801 | 400  | 1 | 5.16E-06 | -1.41 | 2  | 0.5         | Lrrc6                 | Development              |
| DMR7:108127401 | 7 | 108127401 | 400  | 1 | 4.39E-06 | -1.13 | 6  | 1.5         |                       |                          |
| DMR7:114772501 | 7 | 114772501 | 200  | 1 | 8.96E-06 | 1.51  | 3  | 1.5         | Dennd3                | Signaling                |
| DMR7:132198001 | 7 | 132198001 | 600  | 1 | 5.99E-07 | -1.31 | 6  | 1           |                       |                          |

|                 |    |           |      |   |          |       |    |             |                    |                          |
|-----------------|----|-----------|------|---|----------|-------|----|-------------|--------------------|--------------------------|
| DMR7:133776901  | 7  | 133776901 | 1600 | 1 | 2.34E-06 | -1.71 | 40 | 2.5         |                    |                          |
| DMR7:134680001  | 7  | 134680001 | 500  | 1 | 3.14E-06 | -0.76 | 9  | 1.8         | Pph1n1             |                          |
| DMR8:10654701   | 8  | 10654701  | 600  | 1 | 9.03E-06 | 2.26  | 2  | 0.333333333 |                    |                          |
| DMR8:11516101   | 8  | 11516101  | 200  | 1 | 7.19E-06 | -1.29 | 1  | 0.5         |                    |                          |
| DMR8:16602601   | 8  | 16602601  | 1300 | 1 | 2.76E-06 | -1.58 | 6  | 0.461538462 |                    |                          |
| DMR8:18578701   | 8  | 18578701  | 500  | 1 | 2.01E-06 | -0.84 | 0  | 0           |                    |                          |
| DMR8:18685801   | 8  | 18685801  | 300  | 1 | 6.30E-06 | -0.55 | 1  | 0.333333333 |                    |                          |
| DMR8:40496001   | 8  | 40496001  | 400  | 1 | 3.30E-06 | -1.43 | 5  | 1.25        | Olr1204;AC114252.1 |                          |
| DMR8:42050701   | 8  | 42050701  | 500  | 1 | 9.98E-06 | -1.52 | 5  | 1           | Olr1229            |                          |
| DMR8:47080601   | 8  | 47080601  | 300  | 1 | 5.18E-07 | 1.23  | 2  | 0.666666667 | Grik4              | Signaling                |
| DMR8:50468901   | 8  | 50468901  | 3800 | 1 | 7.86E-06 | -0.97 | 80 | 2.105263158 | Sik3               | Receptor                 |
| DMR8:51294001   | 8  | 51294001  | 300  | 1 | 1.84E-06 | 2.34  | 4  | 1.333333333 |                    |                          |
| DMR8:52749901   | 8  | 52749901  | 300  | 1 | 3.84E-06 | -1.6  | 2  | 0.666666667 | Nxpe1              |                          |
| DMR8:58164301   | 8  | 58164301  | 1900 | 1 | 7.98E-06 | -1    | 24 | 1.263157895 | Npat;Acat1         | Transcription;Metabolism |
| DMR8:65190501   | 8  | 65190501  | 4400 | 1 | 8.46E-06 | -0.47 | 41 | 0.931818182 | AABR07070312.1     |                          |
| DMR8:65821401   | 8  | 65821401  | 200  | 1 | 4.89E-06 | 5.03  | 7  | 3.5         |                    |                          |
| DMR8:77171001   | 8  | 77171001  | 200  | 1 | 9.13E-07 | -1.73 | 2  | 1           | Adam10             | Proteolysis              |
| DMR8:99305701   | 8  | 99305701  | 100  | 1 | 1.62E-06 | -1.22 | 0  | 0           |                    |                          |
| DMR8:119708301  | 8  | 119708301 | 1900 | 1 | 5.83E-06 | -1.32 | 32 | 1.684210526 | Dcl3               | Cytoskeleton             |
| DMR8:121151501  | 8  | 121151501 | 200  | 1 | 4.89E-06 | -1.66 | 1  | 0.5         |                    |                          |
| DMR9:10111501   | 9  | 10111501  | 1100 | 1 | 2.81E-06 | -1.29 | 6  | 0.545454545 | Mllt1              | Development              |
| DMR9:18081301   | 9  | 18081301  | 400  | 1 | 9.32E-06 | -1.06 | 11 | 2.75        | AABR07066828.1     |                          |
| DMR9:20268501   | 9  | 20268501  | 1000 | 1 | 3.90E-08 | -1.51 | 18 | 1.8         | LOC100911625;Atn1  | Metabolism;Unknown       |
| DMR9:22665101   | 9  | 22665101  | 200  | 1 | 5.08E-06 | -0.97 | 3  | 1.5         |                    |                          |
| DMR9:25600501   | 9  | 25600501  | 2000 | 1 | 4.33E-06 | -0.85 | 19 | 0.95        |                    |                          |
| DMR9:25839301   | 9  | 25839301  | 300  | 1 | 4.31E-06 | -0.74 | 2  | 0.666666667 | LOC108351902       |                          |
| DMR9:62076001   | 9  | 62076001  | 2700 | 1 | 9.35E-06 | -0.94 | 25 | 0.925925926 |                    |                          |
| DMR9:62351801   | 9  | 62351801  | 200  | 1 | 1.49E-09 | -2.3  | 4  | 2           | Picl1              | Metabolism               |
| DMR9:63032001   | 9  | 63032001  | 300  | 2 | 2.75E-06 | -1.97 | 0  | 0           |                    |                          |
| DMR9:70066301   | 9  | 70066301  | 300  | 1 | 1.10E-06 | -1.51 | 3  | 1           | Zdbf2              | Transcription            |
| DMR9:71210101   | 9  | 71210101  | 800  | 2 | 6.17E-07 | -2.07 | 9  | 1.125       |                    |                          |
| DMR9:82924301   | 9  | 82924301  | 400  | 1 | 7.19E-06 | 1.27  | 2  | 0.5         |                    |                          |
| DMR9:90869001   | 9  | 90869001  | 300  | 1 | 1.84E-06 | -0.84 | 4  | 1.333333333 | LOC100911572       |                          |
| DMR9:92956401   | 9  | 92956401  | 300  | 1 | 3.92E-06 | -1.31 | 5  | 1.666666667 | Gpr55              | Receptor                 |
| DMR9:94169601   | 9  | 94169601  | 300  | 1 | 5.09E-06 | -0.8  | 3  | 1           | Dis3l2;Alpl2       | Transcription;Signaling  |
| DMR9:100106001  | 9  | 100106001 | 1200 | 1 | 8.91E-06 | -0.89 | 7  | 0.583333333 | RF00026;Capn10     | Protease                 |
| DMR9:114589601  | 9  | 114589601 | 100  | 1 | 2.25E-07 | -2.29 | 3  | 3           | Mtcl1              |                          |
| DMR10:1115201   | 10 | 1115201   | 300  | 1 | 4.57E-06 | -1.73 | 0  | 0           |                    |                          |
| DMR10:4015701   | 10 | 4015701   | 700  | 1 | 4.52E-06 | -0.9  | 7  | 1           | Snx29              | Cytoskeleton             |
| DMR10:6477401   | 10 | 6477401   | 2300 | 1 | 1.76E-06 | 2.01  | 53 | 2.304347826 |                    |                          |
| DMR10:9967401   | 10 | 9967401   | 2000 | 1 | 1.95E-06 | -1.35 | 18 | 0.9         |                    |                          |
| DMR10:19970501  | 10 | 19970501  | 3600 | 1 | 8.20E-06 | 2.09  | 52 | 1.444444444 |                    |                          |
| DMR10:22873601  | 10 | 22873601  | 1000 | 1 | 8.65E-06 | -1.59 | 7  | 0.7         |                    |                          |
| DMR10:26640501  | 10 | 26640501  | 1200 | 1 | 4.53E-06 | -0.68 | 10 | 0.833333333 |                    |                          |
| DMR10:27086801  | 10 | 27086801  | 300  | 1 | 5.73E-06 | -0.97 | 4  | 1.333333333 | Gabrg2             | Receptor                 |
| DMR10:30221801  | 10 | 30221801  | 700  | 1 | 9.23E-06 | -1.33 | 4  | 0.571428571 |                    |                          |
| DMR10:37911801  | 10 | 37911801  | 1600 | 1 | 9.77E-06 | 2.11  | 24 | 1.5         |                    |                          |
| DMR10:39562801  | 10 | 39562801  | 1200 | 1 | 9.88E-06 | 1.87  | 15 | 1.25        |                    |                          |
| DMR10:53705301  | 10 | 53705301  | 300  | 1 | 4.33E-06 | -0.86 | 3  | 1           | Myh1               | Cytoskeleton             |
| DMR10:57175901  | 10 | 57175901  | 900  | 1 | 1.53E-06 | -1.1  | 11 | 1.222222222 | Pld2;Mink1         | Metabolism;Signaling     |
| DMR10:59836601  | 10 | 59836601  | 400  | 1 | 6.16E-06 | -0.6  | 3  | 0.75        | Trpv3;Aspa         | Transport;Metabolism     |
| DMR10:64492701  | 10 | 64492701  | 1200 | 1 | 5.49E-06 | -1.02 | 19 | 1.583333333 | Nxn                | Signaling                |
| DMR10:70989201  | 10 | 70989201  | 300  | 1 | 3.92E-06 | -0.54 | 5  | 1.666666667 | AABR07030143.1     |                          |
| DMR10:71214101  | 10 | 71214101  | 1000 | 1 | 4.52E-06 | -0.92 | 11 | 1.1         | Hnf1b              | Transcription            |
| DMR10:71802001  | 10 | 71802001  | 400  | 1 | 4.23E-06 | -1.06 | 3  | 0.75        | Aatf               | Transcription            |
| DMR10:77295101  | 10 | 77295101  | 300  | 1 | 2.19E-06 | -0.93 | 4  | 1.333333333 |                    |                          |
| DMR10:79689201  | 10 | 79689201  | 300  | 1 | 8.61E-07 | -1.42 | 0  | 0           |                    |                          |
| DMR10:102417701 | 10 | 102417701 | 400  | 1 | 4.54E-06 | -0.58 | 4  | 1           | Sdk2               | Development              |
| DMR10:104380801 | 10 | 104380801 | 1100 | 1 | 6.66E-06 | -2.23 | 19 | 1.727272727 | Llg12              | Development              |
| DMR10:110967601 | 10 | 110967601 | 300  | 1 | 5.35E-07 | -2.29 | 3  | 1           |                    |                          |
| DMR11:10012701  | 11 | 10012701  | 1300 | 1 | 2.33E-07 | -1.96 | 18 | 1.384615385 | Robo1              | Development              |
| DMR11:14472901  | 11 | 14472901  | 300  | 1 | 6.30E-06 | 1.8   | 6  | 2           |                    |                          |
| DMR11:20977101  | 11 | 20977101  | 400  | 1 | 8.18E-06 | -1.09 | 1  | 0.25        |                    |                          |

|                 |    |           |      |   |          |       |    |             |                   |                      |
|-----------------|----|-----------|------|---|----------|-------|----|-------------|-------------------|----------------------|
| DMR11:34928601  | 11 | 34928601  | 1200 | 1 | 7.76E-06 | -1.59 | 16 | 1.333333333 | Dyrk1a            | Signaling            |
| DMR11:41278201  | 11 | 41278201  | 1200 | 1 | 8.03E-07 | -1.85 | 6  | 0.5         |                   |                      |
| DMR11:44983901  | 11 | 44983901  | 200  | 1 | 6.03E-06 | -0.94 | 4  | 2           | Col8a1            | Cytoskeleton         |
| DMR11:58334901  | 11 | 58334901  | 300  | 1 | 7.16E-06 | -1.34 | 0  | 0           |                   |                      |
| DMR11:60769601  | 11 | 60769601  | 200  | 1 | 4.19E-06 | -2    | 0  | 0           |                   |                      |
| DMR11:64330301  | 11 | 64330301  | 900  | 1 | 5.68E-06 | -0.88 | 17 | 1.888888889 | Igsf11            | Extracellular Matrix |
| DMR11:68415801  | 11 | 68415801  | 800  | 1 | 1.99E-06 | -1.02 | 10 | 1.25        |                   |                      |
| DMR11:74535601  | 11 | 74535601  | 800  | 1 | 7.60E-06 | -1.18 | 8  | 1           |                   |                      |
| DMR11:75882401  | 11 | 75882401  | 1400 | 1 | 7.64E-07 | -1.66 | 15 | 1.071428571 |                   |                      |
| DMR11:78752201  | 11 | 78752201  | 300  | 1 | 5.86E-06 | -1.53 | 2  | 0.666666667 | Tprg1             |                      |
| DMR11:79429601  | 11 | 79429601  | 200  | 1 | 5.26E-06 | -1.08 | 5  | 2.5         | Lpp               | Cytoskeleton         |
| DMR11:80223901  | 11 | 80223901  | 400  | 1 | 1.75E-06 | -1.09 | 3  | 0.75        |                   |                      |
| DMR11:83549501  | 11 | 83549501  | 300  | 1 | 7.24E-06 | -0.76 | 4  | 1.333333333 | Ephb3             | Receptor             |
| DMR11:86826201  | 11 | 86826201  | 300  | 1 | 1.41E-06 | -1.47 | 1  | 0.333333333 | Tango2            |                      |
| DMR11:89163301  | 11 | 89163301  | 200  | 1 | 6.85E-06 | -1.59 | 2  | 1           | Spidr             |                      |
| DMR12:21074501  | 12 | 21074501  | 1000 | 1 | 9.77E-06 | -0.93 | 4  | 0.4         | Vom2r64           |                      |
| DMR12:23783301  | 12 | 23783301  | 1200 | 1 | 7.58E-06 | 1.53  | 16 | 1.333333333 | Ywhag             | Protein Binding      |
| DMR12:23945501  | 12 | 23945501  | 200  | 1 | 3.16E-06 | -1.66 | 3  | 1.5         | Mdh2;Styx1        | Metabolism;Signaling |
| DMR12:29587501  | 12 | 29587501  | 1900 | 1 | 8.12E-07 | -1.45 | 22 | 1.157894737 | Caln1             | Signaling            |
| DMR12:31601401  | 12 | 31601401  | 800  | 1 | 5.18E-06 | -1.83 | 16 | 2           | Rimbp2;Piiw1      | Unknown              |
| DMR12:31913301  | 12 | 31913301  | 1200 | 1 | 6.37E-06 | -0.63 | 11 | 0.916666667 |                   |                      |
| DMR12:36906801  | 12 | 36906801  | 2800 | 1 | 2.23E-08 | -1.22 | 53 | 1.892857143 | Ncor2             | Transcription        |
| DMR12:38798601  | 12 | 38798601  | 800  | 1 | 6.87E-06 | -1.51 | 13 | 1.625       | Psmad9            | Proteolysis          |
| DMR12:40161701  | 12 | 40161701  | 200  | 1 | 5.38E-06 | 1.16  | 4  | 2           | Cux2              | Development          |
| DMR12:51789301  | 12 | 51789301  | 1300 | 1 | 2.27E-06 | -1.09 | 9  | 0.692307692 | AC095390.2        |                      |
| DMR13:11598201  | 13 | 11598201  | 1800 | 1 | 2.58E-06 | -0.59 | 10 | 0.555555556 |                   |                      |
| DMR13:35613901  | 13 | 35613901  | 400  | 1 | 7.28E-06 | -1.61 | 4  | 1           | Epb415            |                      |
| DMR13:38547001  | 13 | 38547001  | 300  | 1 | 9.83E-06 | -2.1  | 1  | 0.333333333 |                   |                      |
| DMR13:40167201  | 13 | 40167201  | 700  | 1 | 5.05E-06 | -1.35 | 3  | 0.428571429 |                   |                      |
| DMR13:40639601  | 13 | 40639601  | 300  | 1 | 6.72E-06 | -0.78 | 2  | 0.666666667 |                   |                      |
| DMR13:42052601  | 13 | 42052601  | 200  | 1 | 7.44E-08 | -2.04 | 4  | 2           |                   |                      |
| DMR13:43671101  | 13 | 43671101  | 900  | 1 | 1.04E-06 | -0.79 | 5  | 0.555555556 |                   |                      |
| DMR13:46037301  | 13 | 46037301  | 300  | 1 | 9.98E-06 | -1.38 | 4  | 1.333333333 |                   |                      |
| DMR13:50032501  | 13 | 50032501  | 1300 | 1 | 8.25E-07 | 1.89  | 36 | 2.769230769 |                   |                      |
| DMR13:51010101  | 13 | 51010101  | 600  | 1 | 7.12E-06 | -0.5  | 2  | 0.333333333 |                   |                      |
| DMR13:58214201  | 13 | 58214201  | 1100 | 1 | 3.43E-07 | -1.72 | 3  | 0.272727273 |                   |                      |
| DMR13:67435601  | 13 | 67435601  | 300  | 1 | 4.04E-06 | -1.28 | 1  | 0.333333333 | AABR07021355.1    |                      |
| DMR13:88252701  | 13 | 88252701  | 1200 | 1 | 5.63E-07 | -0.71 | 6  | 0.5         |                   |                      |
| DMR13:98027501  | 13 | 98027501  | 1800 | 2 | 2.54E-07 | -1.16 | 20 | 1.111111111 | Kif28p;Ahctf1     | Transcription        |
| DMR13:98097901  | 13 | 98097901  | 600  | 1 | 3.62E-06 | -1.19 | 7  | 1.166666667 |                   |                      |
| DMR13:107477201 | 13 | 107477201 | 1300 | 1 | 5.46E-06 | -1.39 | 15 | 1.153846154 | Kctd3             | Metabolism           |
| DMR13:108667601 | 13 | 108667601 | 400  | 1 | 2.91E-06 | -1.05 | 8  | 2           | Smyd2             | Transcription        |
| DMR13:110704401 | 13 | 110704401 | 600  | 1 | 3.79E-06 | -0.69 | 6  | 1           |                   |                      |
| DMR13:111760501 | 13 | 111760501 | 300  | 1 | 1.82E-06 | -2.5  | 4  | 1.333333333 | Syt14             | Transport            |
| DMR14:1235001   | 14 | 1235001   | 100  | 1 | 4.50E-06 | 1.98  | 0  | 0           |                   |                      |
| DMR14:8688301   | 14 | 8688301   | 200  | 1 | 8.92E-06 | -0.88 | 0  | 0           |                   |                      |
| DMR14:9826701   | 14 | 9826701   | 300  | 1 | 1.12E-06 | -0.94 | 2  | 0.666666667 |                   |                      |
| DMR14:20534801  | 14 | 20534801  | 700  | 1 | 9.61E-06 | -0.86 | 11 | 1.571428571 | Slc4a4            | Metabolism           |
| DMR14:39021301  | 14 | 39021301  | 2000 | 1 | 7.59E-06 | -1.44 | 13 | 0.65        | Gabrb1            | Receptor             |
| DMR14:53148401  | 14 | 53148401  | 300  | 1 | 5.29E-06 | -0.8  | 2  | 0.666666667 |                   |                      |
| DMR14:59791201  | 14 | 59791201  | 400  | 1 | 7.95E-07 | -0.77 | 6  | 1.5         |                   |                      |
| DMR14:60822001  | 14 | 60822001  | 200  | 1 | 2.71E-07 | -1.43 | 2  | 1           |                   |                      |
| DMR14:77476901  | 14 | 77476901  | 700  | 1 | 3.83E-06 | -1.73 | 5  | 0.714285714 | Stx18             | Transport            |
| DMR14:83207201  | 14 | 83207201  | 200  | 1 | 1.55E-06 | -1.38 | 2  | 1           | Depdc5;AC105515.2 | Unknown              |
| DMR14:95040101  | 14 | 95040101  | 1700 | 1 | 1.21E-06 | -0.99 | 38 | 2.235294118 |                   |                      |
| DMR14:95144001  | 14 | 95144001  | 2400 | 1 | 4.64E-08 | -0.85 | 44 | 1.833333333 |                   |                      |
| DMR14:95897201  | 14 | 95897201  | 300  | 1 | 1.81E-06 | -1.16 | 4  | 1.333333333 |                   |                      |
| DMR14:99448701  | 14 | 99448701  | 200  | 1 | 6.40E-06 | -0.99 | 1  | 0.5         |                   |                      |
| DMR14:101694601 | 14 | 101694601 | 1600 | 1 | 6.72E-06 | -0.75 | 42 | 2.625       |                   |                      |
| DMR14:103207401 | 14 | 103207401 | 1300 | 1 | 9.35E-06 | -1    | 12 | 0.923076923 | Meis1             | Transcription        |
| DMR14:104593201 | 14 | 104593201 | 2300 | 1 | 4.57E-06 | -0.86 | 40 | 1.739130435 | Slc1a4            | Metabolism           |
| DMR15:2095101   | 15 | 2095101   | 1000 | 1 | 2.34E-06 | -0.86 | 16 | 1.6         |                   |                      |
| DMR15:3065301   | 15 | 3065301   | 2600 | 1 | 2.28E-09 | 2.41  | 39 | 1.5         | Adk               | Signaling            |

|                 |    |           |      |   |          |        |    |             |                        |               |
|-----------------|----|-----------|------|---|----------|--------|----|-------------|------------------------|---------------|
| DMR15:14444101  | 15 | 14444101  | 300  | 1 | 1.41E-07 | -1.43  | 1  | 0.333333333 |                        |               |
| DMR15:15292601  | 15 | 15292601  | 900  | 1 | 6.29E-06 | 2.45   | 10 | 1.111111111 | Cadps                  | Metabolism    |
| DMR15:23720101  | 15 | 23720101  | 400  | 1 | 1.26E-06 | -0.92  | 2  | 0.5         | Samd4a                 | Signaling     |
| DMR15:33888301  | 15 | 33888301  | 400  | 1 | 5.75E-06 | -1.16  | 2  | 0.5         | Dhrs2                  | Metabolism    |
| DMR15:46426801  | 15 | 46426801  | 200  | 1 | 2.32E-08 | 2.82   | 2  | 1           | Gata4                  | Transcription |
| DMR15:56905101  | 15 | 56905101  | 300  | 1 | 5.71E-06 | 1.66   | 5  | 1.666666667 | Lrch1                  | Unknown       |
| DMR15:60066501  | 15 | 60066501  | 300  | 1 | 7.00E-06 | -0.58  | 3  | 1           | Dnajc15                | Transcription |
| DMR15:67929001  | 15 | 67929001  | 300  | 1 | 1.02E-06 | -1.36  | 3  | 1           |                        |               |
| DMR15:86533701  | 15 | 86533701  | 2300 | 1 | 4.53E-06 | -2.26  | 24 | 1.043478261 |                        |               |
| DMR15:86538001  | 15 | 86538001  | 400  | 1 | 4.93E-06 | -0.9   | 3  | 0.75        |                        |               |
| DMR15:87925201  | 15 | 87925201  | 200  | 1 | 4.39E-06 | -1.44  | 1  | 0.5         | Mycbp2                 | Metabolism    |
| DMR15:90381901  | 15 | 90381901  | 600  | 1 | 8.33E-06 | -0.98  | 8  | 1.333333333 | Mycbp2                 | Metabolism    |
| DMR15:90831201  | 15 | 90831201  | 300  | 1 | 3.29E-06 | -1.53  | 4  | 1.333333333 | Mycbp2;AABR07019140    | Metabolism    |
| DMR15:102374101 | 15 | 102374101 | 600  | 1 | 9.20E-06 | 1.23   | 12 | 2           | Gpc6                   | Cytoskeleton  |
| DMR16:10521901  | 16 | 10521901  | 2700 | 1 | 7.39E-06 | -0.9   | 48 | 1.777777778 | Gprn2                  |               |
| DMR16:11274601  | 16 | 11274601  | 900  | 1 | 4.34E-06 | -1.1   | 8  | 0.888888889 |                        |               |
| DMR16:17910601  | 16 | 17910601  | 200  | 1 | 2.04E-06 | -1.61  | 1  | 0.5         |                        |               |
| DMR16:22021701  | 16 | 22021701  | 1000 | 1 | 3.15E-06 | 1.51   | 23 | 2.3         | Potem                  |               |
| DMR16:31201101  | 16 | 31201101  | 400  | 1 | 5.92E-06 | -0.94  | 2  | 0.5         |                        |               |
| DMR16:33952401  | 16 | 33952401  | 300  | 1 | 2.86E-06 | -1.36  | 2  | 0.666666667 | AABR07025328.1         |               |
| DMR16:38461201  | 16 | 38461201  | 1200 | 1 | 3.27E-08 | -1.27  | 9  | 0.75        |                        |               |
| DMR16:47162501  | 16 | 47162501  | 500  | 1 | 5.26E-06 | -1.07  | 15 | 3           | LOC100911140           |               |
| DMR16:57152001  | 16 | 57152001  | 200  | 1 | 7.28E-06 | -1.5   | 1  | 0.5         |                        |               |
| DMR16:59903901  | 16 | 59903901  | 1000 | 1 | 2.26E-06 | -0.73  | 11 | 1.1         |                        |               |
| DMR16:72541501  | 16 | 72541501  | 1500 | 1 | 7.79E-06 | -1.19  | 18 | 1.2         |                        |               |
| DMR16:73283101  | 16 | 73283101  | 1800 | 1 | 7.65E-06 | -0.96  | 20 | 1.111111111 |                        |               |
| DMR16:77958401  | 16 | 77958401  | 500  | 1 | 1.81E-06 | -1.29  | 2  | 0.4         |                        |               |
| DMR16:78360801  | 16 | 78360801  | 1300 | 1 | 4.75E-06 | -1.3   | 15 | 1.153846154 | AABR07026483.1         |               |
| DMR16:85731501  | 16 | 85731501  | 300  | 1 | 1.62E-06 | -1.38  | 2  | 0.666666667 |                        |               |
| DMR16:86948101  | 16 | 86948101  | 1000 | 1 | 8.57E-06 | -1.43  | 7  | 0.7         |                        |               |
| DMR16:86969701  | 16 | 86969701  | 400  | 1 | 4.04E-06 | -0.49  | 4  | 1           |                        |               |
| DMR17:1591101   | 17 | 1591101   | 2300 | 1 | 2.47E-06 | -1.31  | 27 | 1.173913043 | Hsd17b3                | Metabolism    |
| DMR17:9192101   | 17 | 9192101   | 200  | 1 | 8.37E-06 | -1.93  | 2  | 1           |                        |               |
| DMR17:28013101  | 17 | 28013101  | 200  | 1 | 1.09E-06 | -2.35  | 3  | 1.5         | AABR07027394.2;RF00003 |               |
| DMR17:33592601  | 17 | 33592601  | 1900 | 1 | 2.04E-06 | -0.7   | 22 | 1.157894737 | Gmds                   | Signaling     |
| DMR17:43537101  | 17 | 43537101  | 100  | 1 | 4.65E-06 | -2.59  | 1  | 1           | Slc17a3                | Metabolism    |
| DMR17:44954601  | 17 | 44954601  | 1000 | 1 | 4.52E-07 | -1.49  | 9  | 0.9         | Olr1657                | Receptor      |
| DMR17:47885401  | 17 | 47885401  | 1100 | 1 | 5.10E-06 | 1.26   | 14 | 1.272727273 | AABR07027872.1         |               |
| DMR17:54179401  | 17 | 54179401  | 300  | 1 | 1.60E-06 | -1.2   | 0  | 0           | LOC108348568;Kif5b     | Cytoskeleton  |
| DMR17:58239701  | 17 | 58239701  | 200  | 1 | 5.63E-06 | 2.31   | 3  | 1.5         | Adarb2                 | Transcription |
| DMR17:64194601  | 17 | 64194601  | 1200 | 1 | 6.66E-06 | -1.64  | 13 | 1.083333333 |                        |               |
| DMR17:65242301  | 17 | 65242301  | 1000 | 1 | 3.10E-06 | -1.17  | 8  | 0.8         |                        |               |
| DMR17:65288301  | 17 | 65288301  | 600  | 1 | 5.39E-06 | 1.81   | 5  | 0.833333333 |                        |               |
| DMR17:72026901  | 17 | 72026901  | 1300 | 1 | 5.43E-06 | 1.25   | 26 | 2           | AABR07028488.1         |               |
| DMR17:72274601  | 17 | 72274601  | 200  | 1 | 3.56E-07 | -1.59  | 6  | 3           | Atp5f1c                |               |
| DMR17:73557601  | 17 | 73557601  | 1700 | 1 | 6.59E-06 | -1.83  | 20 | 1.176470588 |                        |               |
| DMR17:78516701  | 17 | 78516701  | 400  | 1 | 2.70E-06 | -1.243 | 14 | 3.5         | Fam107b                |               |
| DMR17:81987301  | 17 | 81987301  | 1300 | 1 | 2.17E-06 | -0.95  | 9  | 0.692307692 | Cacnb2                 | Transport     |
| DMR17:86729301  | 17 | 86729301  | 400  | 1 | 6.08E-06 | -0.88  | 2  | 0.5         |                        |               |
| DMR18:1991201   | 18 | 1991201   | 400  | 1 | 3.29E-06 | -1.01  | 3  | 0.75        | Mib1                   | Metabolism    |
| DMR18:2445001   | 18 | 2445001   | 300  | 1 | 9.73E-06 | -0.84  | 3  | 1           | Gata6                  | Transcription |
| DMR18:14734001  | 18 | 14734001  | 300  | 1 | 7.08E-06 | -1.65  | 4  | 1.333333333 | RGD1563861             | Transcription |
| DMR18:16304701  | 18 | 16304701  | 200  | 1 | 9.96E-07 | -2.87  | 2  | 1           |                        |               |
| DMR18:22678601  | 18 | 22678601  | 100  | 1 | 5.98E-06 | -1.83  | 1  | 1           |                        |               |
| DMR18:26986201  | 18 | 26986201  | 200  | 1 | 1.97E-06 | -1.5   | 3  | 1.5         | RF00066;AABR07031689.1 |               |
| DMR18:46684701  | 18 | 46684701  | 300  | 1 | 9.39E-06 | -2.03  | 4  | 1.333333333 |                        |               |
| DMR18:48835001  | 18 | 48835001  | 300  | 1 | 3.09E-06 | -1.92  | 0  | 0           | AABR07032135.1         |               |
| DMR18:55805601  | 18 | 55805601  | 100  | 1 | 2.82E-06 | -1.29  | 1  | 1           | Dctn4                  | Cytoskeleton  |
| DMR18:62341901  | 18 | 62341901  | 200  | 1 | 4.87E-06 | -1.73  | 1  | 0.5         |                        |               |
| DMR18:75812101  | 18 | 75812101  | 2900 | 1 | 3.27E-06 | -0.86  | 24 | 0.827586207 |                        |               |
| DMR18:84870501  | 18 | 84870501  | 700  | 1 | 1.50E-06 | -2.26  | 2  | 0.285714286 |                        |               |
| DMR19:10838301  | 19 | 10838301  | 300  | 1 | 4.56E-06 | -1.27  | 6  | 2           | Fam192a;RF00392        |               |
| DMR19:12602301  | 19 | 12602301  | 900  | 1 | 1.48E-06 | -1.4   | 11 | 1.222222222 | Large1                 |               |

|                |    |           |      |   |          |       |    |             |                |               |
|----------------|----|-----------|------|---|----------|-------|----|-------------|----------------|---------------|
| DMR19:16697501 | 19 | 16697501  | 300  | 1 | 9.24E-07 | -1.06 | 8  | 2.666666667 |                |               |
| DMR19:42275101 | 19 | 42275101  | 1000 | 1 | 7.33E-06 | -1.04 | 16 | 1.6         |                |               |
| DMR19:56379601 | 19 | 56379601  | 900  | 1 | 9.94E-06 | -1.45 | 11 | 1.222222222 |                |               |
| DMR19:58574701 | 19 | 58574701  | 600  | 1 | 4.13E-07 | -0.74 | 8  | 1.333333333 | Ntpcr;Pcnx2    |               |
| DMR20:8304801  | 20 | 8304801   | 200  | 1 | 6.17E-06 | -0.57 | 8  | 4           | Rnf8;Cmtr1     | Proteolysis   |
| DMR20:11885701 | 20 | 11885701  | 1100 | 1 | 6.83E-07 | 1.49  | 24 | 2.181818182 | Fam207a        |               |
| DMR20:14464301 | 20 | 14464301  | 1600 | 1 | 1.76E-06 | -0.67 | 26 | 1.625       | Bcr            | DNA repair    |
| DMR20:14724401 | 20 | 14724401  | 3400 | 1 | 7.36E-07 | -1.26 | 77 | 2.264705882 |                |               |
| DMR20:15134301 | 20 | 15134301  | 2800 | 2 | 6.35E-06 | -0.87 | 28 | 1           | Pcdh15         | Cytoskeleton  |
| DMR20:15626201 | 20 | 15626201  | 1100 | 1 | 9.90E-06 | -1.38 | 11 | 1           |                |               |
| DMR20:27397601 | 20 | 27397601  | 200  | 1 | 8.01E-06 | -1.15 | 2  | 1           | Tet1           |               |
| DMR20:31989801 | 20 | 31989801  | 300  | 1 | 4.59E-06 | -1.69 | 1  | 0.333333333 |                |               |
| DMR20:44493401 | 20 | 44493401  | 1900 | 1 | 7.73E-06 | -1.06 | 21 | 1.105263158 | Fyn            | Transcription |
| DMR20:44521601 | 20 | 44521601  | 2700 | 1 | 6.78E-06 | 1.1   | 67 | 2.481481481 | Fyn            | Transcription |
| DMRX:14333201  | X  | 14333201  | 500  | 1 | 6.60E-06 | -0.89 | 5  | 1           | Rpgr           | Metabolism    |
| DMRX:17463801  | X  | 17463801  | 700  | 1 | 9.37E-06 | -1.33 | 4  | 0.571428571 |                |               |
| DMRX:18239401  | X  | 18239401  | 300  | 1 | 8.05E-06 | -1.33 | 2  | 0.666666667 |                |               |
| DMRX:59801301  | X  | 59801301  | 200  | 1 | 4.05E-06 | -1.67 | 2  | 1           |                |               |
| DMRX:79387501  | X  | 79387501  | 200  | 1 | 4.32E-08 | -2.02 | 2  | 1           |                |               |
| DMRX:83687801  | X  | 83687801  | 200  | 1 | 4.19E-06 | -2    | 1  | 0.5         | Apool          | Metabolism    |
| DMRX:85113501  | X  | 85113501  | 100  | 1 | 1.19E-08 | -2.55 | 0  | 0           | RF00322        |               |
| DMRX:117534201 | X  | 117534201 | 200  | 1 | 8.20E-06 | 1.76  | 1  | 0.5         |                |               |
| DMRX:121320301 | X  | 121320301 | 300  | 1 | 7.21E-06 | -0.62 | 3  | 1           |                |               |
| DMRX:139292501 | X  | 139292501 | 300  | 1 | 1.83E-06 | -1.43 | 1  | 0.333333333 |                |               |
| DMRX:140094901 | X  | 140094901 | 300  | 1 | 5.04E-06 | -0.63 | 4  | 1.333333333 |                |               |
| DMRX:148066201 | X  | 148066201 | 200  | 1 | 3.16E-06 | -1.57 | 2  | 1           |                |               |
| DMRX:149274301 | X  | 149274301 | 3800 | 1 | 6.93E-06 | -0.87 | 13 | 0.342105263 | AABR07042135.1 |               |
| DMRX:149572401 | X  | 149572401 | 300  | 1 | 4.75E-06 | -1.3  | 2  | 0.666666667 |                |               |
| DMRX:150981001 | X  | 150981001 | 300  | 1 | 1.74E-06 | -1.61 | 4  | 1.333333333 |                |               |
