# Supplementary material for: Vinclozolin induced epigenetic transgenerational inheritance of pathologies and sperm epimutation biomarkers for specific diseases
Source: PubMed Central journal article supplement (PMC6114855; doi:10.1371/journal.pone.0202662), 2018-08-29
Supplement: pone.0202662.s007.pdf [file pone.0202662.s007.pdf]

**Supplemental Table S6**  
**Kidney Disease DMR Signature List**

| DMR Name       | Chr | Start     | Length | # Sig Win | minP     | Log Fold Change | CpG # | CpG Density | Gene Annotation        | Gene Category           |
|----------------|-----|-----------|--------|-----------|----------|-----------------|-------|-------------|------------------------|-------------------------|
| DMR1:6043801   | 1   | 6043801   | 400    | 1         | 5.17E-06 | 1.14            | 4     |             | RF00322                |                         |
| DMR1:20416801  | 1   | 20416801  | 400    | 1         | 9.33E-06 | 1.17            | 3     | 0.75        | Tmem200a;RGD1559962    | Unknown;Epigenetics     |
| DMR1:25572201  | 1   | 25572201  | 500    | 1         | 3.99E-06 | -2.1            | 0     | 0           | Trdn                   | Cytoskeleton            |
| DMR1:29501501  | 1   | 29501501  | 200    | 1         | 6.65E-06 | 1.268           | 0     | 0           |                        |                         |
| DMR1:32225401  | 1   | 32225401  | 1000   | 1         | 6.52E-06 | 1.09            | 11    | 1.1         | Slc6a19;Slc6a18        | Transport               |
| DMR1:60618601  | 1   | 60618601  | 400    | 1         | 3.35E-07 | 1.33            | 9     | 2.25        |                        |                         |
| DMR1:61793601  | 1   | 61793601  | 1400   | 1         | 2.77E-06 | 1.47            | 33    | 2.357142857 | AABR07001905.1         |                         |
| DMR1:63969901  | 1   | 63969901  | 200    | 1         | 4.77E-06 | 1.55            | 1     | 0.5         | Lilrb3a;AABR07002001.1 |                         |
| DMR1:75108101  | 1   | 75108101  | 2100   | 1         | 6.56E-06 | 2.22            | 28    | 1.333333333 |                        |                         |
| DMR1:76225401  | 1   | 76225401  | 800    | 1         | 7.18E-06 | 1.88            | 32    | 4           |                        |                         |
| DMR1:76490201  | 1   | 76490201  | 500    | 1         | 3.19E-06 | 1.47            | 6     | 1.2         | Sult2a2                | Metabolism              |
| DMR1:76504201  | 1   | 76504201  | 200    | 1         | 7.92E-06 | 1.74            | 0     | 0           | Sult2a2                | Metabolism              |
| DMR1:76602401  | 1   | 76602401  | 200    | 1         | 5.77E-06 | 1.48            | 0     | 0           | Sult2a2                | Metabolism              |
| DMR1:77295201  | 1   | 77295201  | 900    | 2         | 1.92E-06 | 0.57            | 2     | 0.222222222 |                        |                         |
| DMR1:109469501 | 1   | 109469501 | 300    | 1         | 1.12E-07 | 1.14            | 0     | 0           | AABR07003418.1         |                         |
| DMR1:115686101 | 1   | 115686101 | 200    | 1         | 6.56E-06 | 1.94            | 1     | 0.5         |                        |                         |
| DMR1:118206301 | 1   | 118206301 | 1000   | 1         | 1.65E-07 | 2.13            | 7     | 0.7         |                        |                         |
| DMR1:127013301 | 1   | 127013301 | 200    | 1         | 3.10E-06 | 1.26            | 2     | 1           | Chsy1                  | Metabolism              |
| DMR1:132164801 | 1   | 132164801 | 100    | 1         | 6.24E-06 | -0.88           | 7     | 7           |                        |                         |
| DMR1:140705801 | 1   | 140705801 | 300    | 1         | 5.72E-06 | 0.96            | 1     | 0.333333333 |                        |                         |
| DMR1:145128801 | 1   | 145128801 | 200    | 1         | 2.42E-06 | 2.25            | 1     | 0.5         |                        |                         |
| DMR1:145506101 | 1   | 145506101 | 700    | 1         | 3.44E-06 | 2.76            | 4     | 0.571428571 |                        |                         |
| DMR1:152849601 | 1   | 152849601 | 300    | 1         | 4.79E-07 | 1.56            | 3     | 1           |                        |                         |
| DMR1:180800801 | 1   | 180800801 | 10000  | 1         | 8.52E-06 | -0.55           | 261   | 2.61        |                        |                         |
| DMR1:181215001 | 1   | 181215001 | 800    | 1         | 5.47E-06 | -0.39           | 22    | 2.75        |                        |                         |
| DMR1:182008401 | 1   | 182008401 | 5000   | 1         | 6.41E-06 | -0.48           | 120   | 2.4         |                        |                         |
| DMR1:196608601 | 1   | 196608601 | 300    | 1         | 9.84E-06 | 2.27            | 2     | 0.666666667 |                        |                         |
| DMR1:199546201 | 1   | 199546201 | 1700   | 1         | 1.84E-06 | -2.22           | 17    | 1           | Itgad;Itgax            | Extracellular Matrix    |
| DMR1:236275001 | 1   | 236275001 | 300    | 1         | 2.27E-06 | 1.51            | 0     | 0           | Pcsk5                  | Protease                |
| DMR1:245850801 | 1   | 245850801 | 700    | 1         | 6.74E-06 | -1.23           | 13    | 1.857142857 | Rfx3                   | Transcription           |
| DMR1:273437101 | 1   | 273437101 | 300    | 1         | 3.06E-06 | 2.06            | 1     | 0.333333333 |                        |                         |
| DMR2:3628901   | 2   | 3628901   | 1000   | 1         | 3.64E-06 | 1.71            | 5     | 0.5         | Mctp1;RF00560          | Unknown                 |
| DMR2:28888301  | 2   | 28888301  | 200    | 1         | 2.13E-06 | 2.48            | 0     | 0           | AABR07007802.1         |                         |
| DMR2:33675901  | 2   | 33675901  | 100    | 1         | 1.29E-06 | 2.76            | 0     | 0           |                        |                         |
| DMR2:36137401  | 2   | 36137401  | 1400   | 1         | 8.88E-06 | 0.91            | 11    | 0.785714286 |                        |                         |
| DMR2:39517401  | 2   | 39517401  | 800    | 1         | 2.98E-08 | 2.65            | 13    | 1.625       | AABR07008025.1         |                         |
| DMR2:46539101  | 2   | 46539101  | 400    | 1         | 7.70E-06 | -1.51           | 5     | 1.25        | Fst                    | Growth factor           |
| DMR2:55660801  | 2   | 55660801  | 100    | 1         | 1.35E-06 | -2.09           | 1     | 1           |                        |                         |
| DMR2:56390701  | 2   | 56390701  | 1000   | 1         | 3.53E-08 | 1.9             | 5     | 0.5         |                        |                         |
| DMR2:56732901  | 2   | 56732901  | 300    | 1         | 1.66E-10 | 3.33            | 0     | 0           |                        |                         |
| DMR2:60202701  | 2   | 60202701  | 200    | 1         | 1.90E-06 | -1.44           | 2     | 1           | Prlr                   | Receptor                |
| DMR2:61120701  | 2   | 61120701  | 400    | 2         | 4.75E-06 | 5.61            | 3     | 0.75        | Adamts12               | Protease                |
| DMR2:94480801  | 2   | 94480801  | 1400   | 1         | 6.12E-06 | 1.5             | 21    | 1.5         | Zfp704                 | Transcription           |
| DMR2:103722701 | 2   | 103722701 | 1300   | 1         | 5.53E-06 | 1.69            | 9     | 0.692307692 |                        |                         |
| DMR2:105433301 | 2   | 105433301 | 200    | 1         | 4.23E-06 | -1.45           | 6     | 3           |                        |                         |
| DMR2:149305601 | 2   | 149305601 | 100    | 1         | 8.41E-06 | 1.61            | 1     | 1           | Med12l                 | Transcription           |
| DMR2:156575501 | 2   | 156575501 | 1100   | 1         | 6.07E-06 | -0.543          | 27    | 2.454545455 |                        |                         |
| DMR2:176994901 | 2   | 176994901 | 300    | 1         | 1.36E-06 | 0.81            | 3     | 1           |                        |                         |
| DMR2:189953301 | 2   | 189953301 | 300    | 1         | 8.29E-06 | -1.97           | 4     | 1.333333333 | S100a3;RF00003         | Receptor                |
| DMR2:197677901 | 2   | 197677901 | 100    | 1         | 3.34E-06 | -1.68           | 4     | 4           | Ctss;Hormad1           | Proteolysis;Development |
| DMR2:207388501 | 2   | 207388501 | 200    | 1         | 3.74E-07 | -1.41           | 2     | 1           | St7l                   | Unknown                 |
| DMR2:207940601 | 2   | 207940601 | 400    | 1         | 3.44E-06 | 2.46            | 1     | 0.25        | Kcnd3                  | Transport               |
| DMR2:229236801 | 2   | 229236801 | 500    | 1         | 5.42E-06 | 1.42            | 2     | 0.4         | Ndst4                  | Metabolism              |
| DMR2:243143501 | 2   | 243143501 | 200    | 1         | 9.47E-06 | -1.62           | 3     | 1.5         | Dnajb14                | Protein Binding         |
| DMR3:85077601  | 3   | 85077601  | 300    | 1         | 8.42E-07 | 1.24            | 1     | 0.333333333 |                        |                         |
| DMR3:112411201 | 3   | 112411201 | 1100   | 1         | 6.43E-06 | -1.82           | 20    | 1.818181818 |                        |                         |
| DMR3:120330001 | 3   | 120330001 | 300    | 1         | 5.86E-07 | -1.86           | 2     | 0.666666667 | AABR07053687.1         |                         |
| DMR3:134020001 | 3   | 134020001 | 1700   | 1         | 2.87E-06 | -0.41           | 38    | 2.235294118 |                        |                         |
| DMR3:149639501 | 3   | 149639501 | 200    | 1         | 5.63E-06 | 2.09            | 1     | 0.5         | Bpifa1;Bpifa5          |                         |
| DMR3:154662501 | 3   | 154662501 | 300    | 1         | 7.57E-06 | 1.04            | 0     | 0           |                        |                         |

|                |    |           |      |   |          |       |    |             |                          |                           |
|----------------|----|-----------|------|---|----------|-------|----|-------------|--------------------------|---------------------------|
| DMR3:163659401 | 3  | 163659401 | 400  | 1 | 2.85E-06 | 0.94  | 9  | 2.25        | Arfgef2;AC130053.1;Cse1l | Signaling;Transport       |
| DMR3:166861601 | 3  | 166861601 | 300  | 1 | 8.39E-06 | -1.28 | 7  | 2.333333333 |                          |                           |
| DMR3:172079601 | 3  | 172079601 | 700  | 1 | 7.90E-06 | 0.6   | 1  | 0.142857143 |                          |                           |
| DMR4:4028801   | 4  | 4028801   | 200  | 1 | 1.88E-06 | 1.59  | 0  | 0           | Dpp6                     | Proteolysis               |
| DMR4:68148201  | 4  | 68148201  | 200  | 1 | 5.48E-06 | 1.58  | 0  | 0           |                          |                           |
| DMR4:79830501  | 4  | 79830501  | 900  | 1 | 4.97E-06 | 1.46  | 4  | 0.444444444 |                          |                           |
| DMR4:113244601 | 4  | 113244601 | 800  | 1 | 8.06E-06 | 1.24  | 18 | 2.25        | Tacr1                    | Receptor                  |
| DMR4:153168301 | 4  | 153168301 | 2500 | 1 | 4.22E-06 | 1.55  | 34 | 1.36        |                          |                           |
| DMR4:165432701 | 4  | 165432701 | 100  | 1 | 4.92E-06 | 2.36  | 1  | 1           | Klra2                    | Immune response           |
| DMR4:171653301 | 4  | 171653301 | 1300 | 1 | 1.12E-06 | 0.67  | 11 | 0.846153846 |                          |                           |
| DMR5:32751801  | 5  | 32751801  | 900  | 1 | 7.55E-06 | 0.81  | 7  | 0.777777778 | Cnbd1                    |                           |
| DMR5:49760901  | 5  | 49760901  | 300  | 1 | 2.39E-06 | 2.69  | 6  | 2           |                          |                           |
| DMR5:74341701  | 5  | 74341701  | 1400 | 2 | 1.06E-07 | 1.38  | 25 | 1.785714286 | Ptpn3                    | Signaling                 |
| DMR5:78777301  | 5  | 78777301  | 900  | 1 | 6.00E-07 | 1.31  | 6  | 0.666666667 |                          |                           |
| DMR5:107158001 | 5  | 107158001 | 300  | 1 | 2.97E-06 | 1.02  | 1  | 0.333333333 |                          |                           |
| DMR5:119829901 | 5  | 119829901 | 400  | 1 | 4.83E-06 | 2.76  | 4  | 1           | Cachd1                   | Unknown                   |
| DMR5:142345801 | 5  | 142345801 | 200  | 1 | 5.63E-06 | 2.37  | 2  | 1           | LOC100909856             |                           |
| DMR5:153530401 | 5  | 153530401 | 200  | 1 | 4.51E-06 | 1.8   | 4  | 2           | Runx3                    | Transcription             |
| DMR5:156076201 | 5  | 156076201 | 300  | 1 | 3.67E-06 | 0.85  | 0  | 0           | Rap1gap;Alpl             | Signaling;Metabolism      |
| DMR5:161615601 | 5  | 161615601 | 700  | 1 | 7.76E-07 | -2.3  | 21 | 3           |                          |                           |
| DMR5:163078801 | 5  | 163078801 | 2400 | 1 | 6.64E-06 | 1.37  | 11 | 0.458333333 | Vps13d                   |                           |
| DMR5:170757601 | 5  | 170757601 | 300  | 1 | 2.14E-06 | 1.74  | 2  | 0.666666667 |                          |                           |
| DMR5:171389001 | 5  | 171389001 | 3600 | 1 | 6.53E-08 | 1.12  | 63 | 1.75        | Tp73                     | Transcription             |
| DMR6:34727101  | 6  | 34727101  | 3000 | 1 | 7.30E-06 | 2.38  | 28 | 0.933333333 |                          |                           |
| DMR6:70222401  | 6  | 70222401  | 600  | 1 | 8.62E-06 | 1.19  | 1  | 0.166666667 | RF00100;AABR07064230.1   |                           |
| DMR6:71791801  | 6  | 71791801  | 400  | 1 | 3.09E-06 | 1.22  | 4  | 1           |                          |                           |
| DMR6:80428901  | 6  | 80428901  | 200  | 1 | 9.74E-06 | -1.86 | 0  | 0           |                          |                           |
| DMR7:30720401  | 7  | 30720401  | 300  | 1 | 3.11E-06 | -1.77 | 7  | 2.333333333 | Anks1b                   | Transcription             |
| DMR7:65319601  | 7  | 65319601  | 200  | 1 | 2.57E-06 | 1.28  | 8  | 4           |                          |                           |
| DMR7:72356601  | 7  | 72356601  | 300  | 1 | 9.46E-06 | 1.37  | 0  | 0           |                          |                           |
| DMR7:72498401  | 7  | 72498401  | 300  | 1 | 6.71E-06 | 1.21  | 2  | 0.666666667 |                          |                           |
| DMR7:72750001  | 7  | 72750001  | 1500 | 1 | 8.47E-06 | 2.6   | 15 | 1           |                          |                           |
| DMR7:86101001  | 7  | 86101001  | 1300 | 1 | 4.37E-06 | 1.15  | 8  | 0.615384615 |                          |                           |
| DMR7:95075301  | 7  | 95075301  | 1200 | 1 | 1.38E-06 | 1.56  | 20 | 1.666666667 | Col14a1                  | Cytoskeleton              |
| DMR7:112287601 | 7  | 112287601 | 300  | 1 | 9.88E-06 | 1.15  | 0  | 0           |                          |                           |
| DMR7:116425601 | 7  | 116425601 | 900  | 1 | 6.74E-06 | 0.94  | 8  | 0.888888889 | AABR07058441.1;Ly6i      | Immune response           |
| DMR7:117273801 | 7  | 117273801 | 200  | 1 | 6.46E-06 | 1.3   | 5  | 2.5         | Plec                     | Cytoskeleton              |
| DMR7:120115101 | 7  | 120115101 | 200  | 1 | 7.78E-06 | 2.51  | 1  | 0.5         | Gga1;AC096473.1          | Transport                 |
| DMR7:122952501 | 7  | 122952501 | 2400 | 1 | 2.26E-07 | 1.89  | 32 | 1.333333333 | Rangap1                  | Signaling                 |
| DMR7:126916401 | 7  | 126916401 | 300  | 2 | 8.76E-09 | 2.02  | 5  | 1.666666667 | Celsr1                   | Receptor                  |
| DMR7:127520101 | 7  | 127520101 | 300  | 1 | 1.85E-06 | 1.32  | 7  | 2.333333333 |                          |                           |
| DMR7:134233301 | 7  | 134233301 | 400  | 2 | 9.83E-07 | 0.91  | 2  | 0.5         |                          |                           |
| DMR7:139592501 | 7  | 139592501 | 500  | 1 | 7.87E-06 | 0.97  | 4  | 0.8         |                          |                           |
| DMR8:5810301   | 8  | 5810301   | 1400 | 1 | 8.16E-06 | 1.58  | 13 | 0.928571429 | Mmp27                    | Protease                  |
| DMR8:19176801  | 8  | 19176801  | 100  | 1 | 5.40E-06 | -1.79 | 1  | 1           | Olr1138;LOC100911988     |                           |
| DMR8:28392701  | 8  | 28392701  | 500  | 1 | 7.84E-06 | 1.37  | 10 | 2           | Igsf9b                   |                           |
| DMR8:58687901  | 8  | 58687901  | 1300 | 1 | 2.96E-06 | 1.18  | 11 | 0.846153846 |                          |                           |
| DMR8:93645801  | 8  | 93645801  | 1000 | 2 | 2.14E-07 | 2.08  | 5  | 0.5         |                          |                           |
| DMR8:119377801 | 8  | 119377801 | 100  | 1 | 6.65E-06 | 1.25  | 2  | 2           | AABR07073453.1;Lrrfip2   | Transcription             |
| DMR9:36215801  | 9  | 36215801  | 2300 | 1 | 1.40E-06 | 1.09  | 12 | 0.52173913  |                          |                           |
| DMR9:64136401  | 9  | 64136401  | 200  | 1 | 8.73E-07 | -1.95 | 3  | 1.5         |                          |                           |
| DMR9:82715101  | 9  | 82715101  | 300  | 1 | 3.56E-06 | 1.07  | 3  | 1           | Stk11ip                  | Signaling                 |
| DMR9:95728701  | 9  | 95728701  | 1700 | 1 | 9.97E-06 | 1.16  | 9  | 0.529411765 |                          |                           |
| DMR9:98552001  | 9  | 98552001  | 300  | 2 | 8.60E-08 | 1.19  | 10 | 3.333333333 | Per2;Hes6                | Development;Transcription |
| DMR9:100420701 | 9  | 100420701 | 400  | 1 | 8.85E-06 | 1.6   | 6  | 1.5         | AABR07068351.2;Sned1     | Signaling                 |
| DMR9:120163001 | 9  | 120163001 | 800  | 1 | 7.19E-06 | 1.31  | 6  | 0.75        |                          |                           |
| DMR10:2287701  | 10 | 2287701   | 200  | 2 | 1.92E-06 | 1.22  | 1  | 0.5         |                          |                           |
| DMR10:3389401  | 10 | 3389401   | 300  | 1 | 7.01E-07 | -1.01 | 2  | 0.666666667 | RF00001                  |                           |
| DMR10:12565901 | 10 | 12565901  | 300  | 1 | 6.54E-06 | -1.25 | 2  | 0.666666667 | AC129054.2;Olr1372       | Receptor                  |
| DMR10:29171001 | 10 | 29171001  | 1200 | 1 | 3.54E-06 | 0.66  | 15 | 1.25        | Ccnjl                    | Signaling                 |
| DMR10:37507901 | 10 | 37507901  | 500  | 1 | 1.42E-06 | 2.12  | 6  | 1.2         |                          |                           |
| DMR10:41884201 | 10 | 41884201  | 900  | 1 | 5.35E-06 | 3.05  | 11 | 1.222222222 | AABR07029634.1           |                           |
| DMR10:47748901 | 10 | 47748901  | 400  | 1 | 6.58E-06 | -0.46 | 4  | 1           |                          |                           |
| DMR10:49560901 | 10 | 49560901  | 1200 | 1 | 3.72E-06 | -1.94 | 12 | 1           | Pmp22                    | Development               |

|                 |    |           |      |   |          |       |     |             |                       |                      |
|-----------------|----|-----------|------|---|----------|-------|-----|-------------|-----------------------|----------------------|
| DMR10:52387101  | 10 | 52387101  | 300  | 1 | 3.90E-07 | 2.03  | 2   | 0.666666667 | Dnah9                 | Cytoskeleton         |
| DMR10:55751901  | 10 | 55751901  | 2100 | 1 | 2.69E-06 | 2.59  | 31  | 1.476190476 | Alox12b               |                      |
| DMR10:57232901  | 10 | 57232901  | 400  | 1 | 8.69E-06 | 1.3   | 11  | 2.75        | Mink1;Chrne;LOC687707 | Signaling;Receptor   |
| DMR10:86665101  | 10 | 86665101  | 500  | 1 | 1.47E-06 | 1.84  | 6   | 1.2         | Thra                  | Receptor             |
| DMR10:101361601 | 10 | 101361601 | 1300 | 1 | 1.37E-06 | 1.71  | 22  | 1.692307692 |                       |                      |
| DMR10:112279401 | 10 | 112279401 | 1400 | 1 | 8.69E-06 | -0.72 | 27  | 1.928571429 |                       |                      |
| DMR11:680201    | 11 | 680201    | 1300 | 1 | 4.79E-06 | 1     | 4   | 0.307692308 | Epha3                 | Receptor             |
| DMR11:29318801  | 11 | 29318801  | 300  | 1 | 5.14E-06 | -1.33 | 5   | 1.666666667 |                       |                      |
| DMR11:46634401  | 11 | 46634401  | 200  | 1 | 9.95E-06 | 1.89  | 0   | 0           | Impg2                 | Receptor             |
| DMR11:77980901  | 11 | 77980901  | 100  | 1 | 7.35E-06 | -0.96 | 0   | 0           |                       |                      |
| DMR11:88071201  | 11 | 88071201  | 400  | 1 | 4.84E-06 | 1.06  | 6   | 1.5         | Ube2l3                | Metabolism           |
| DMR12:408201    | 12 | 408201    | 1300 | 1 | 5.46E-06 | -1.16 | 30  | 2.307692308 |                       |                      |
| DMR12:3349801   | 12 | 3349801   | 8000 | 4 | 3.23E-06 | -0.43 | 205 | 2.5625      |                       |                      |
| DMR12:6621701   | 12 | 6621701   | 200  | 1 | 6.86E-06 | -1.78 | 2   | 1           | AABR07035194.1        |                      |
| DMR12:22858801  | 12 | 22858801  | 1100 | 1 | 4.84E-06 | 1.93  | 16  | 1.454545455 | Col26a1               | Extracellular Matrix |
| DMR12:35086101  | 12 | 35086101  | 900  | 1 | 8.45E-06 | 0.9   | 2   | 0.222222222 |                       |                      |
| DMR12:42750201  | 12 | 42750201  | 1100 | 1 | 2.79E-06 | 0.53  | 8   | 0.727272727 |                       |                      |
| DMR12:44365101  | 12 | 44365101  | 1000 | 1 | 9.69E-09 | -1.68 | 22  | 2.2         | Nos1                  | Metabolism           |
| DMR12:45380101  | 12 | 45380101  | 1700 | 1 | 5.31E-06 | 1.09  | 25  | 1.470588235 |                       |                      |
| DMR12:48103101  | 12 | 48103101  | 700  | 1 | 3.63E-06 | -1.32 | 13  | 1.857142857 | Foxn4                 | Transcription        |
| DMR12:52445401  | 12 | 52445401  | 1200 | 1 | 4.94E-07 | 2.25  | 8   | 0.666666667 | Pole;Pxmp2            | Transcription        |
| DMR13:8758401   | 13 | 8758401   | 200  | 1 | 2.10E-06 | 1.82  | 2   | 1           |                       |                      |
| DMR13:11812601  | 13 | 11812601  | 300  | 1 | 1.77E-06 | 1.37  | 0   | 0           |                       |                      |
| DMR13:22528401  | 13 | 22528401  | 3200 | 1 | 7.71E-06 | 2.24  | 134 | 4.1875      | Cntnap5b              | Cytoskeleton         |
| DMR13:33485301  | 13 | 33485301  | 1200 | 1 | 5.85E-07 | -0.43 | 35  | 2.916666667 |                       |                      |
| DMR13:33813601  | 13 | 33813601  | 1400 | 1 | 4.91E-07 | -0.44 | 40  | 2.857142857 |                       |                      |
| DMR13:35207501  | 13 | 35207501  | 1300 | 1 | 3.29E-06 | 1.91  | 12  | 0.923076923 |                       |                      |
| DMR13:42910401  | 13 | 42910401  | 200  | 1 | 5.67E-06 | 2.14  | 6   | 3           |                       |                      |
| DMR13:51085901  | 13 | 51085901  | 2600 | 1 | 7.65E-06 | -1.44 | 25  | 0.961538462 | Adora1                | Receptor             |
| DMR13:107320901 | 13 | 107320901 | 500  | 1 | 7.24E-06 | -1.41 | 4   | 0.8         | Ush2a                 | Extracellular Matrix |
| DMR14:13687901  | 14 | 13687901  | 3900 | 1 | 9.25E-06 | 0.9   | 31  | 0.794871795 |                       |                      |
| DMR14:19854901  | 14 | 19854901  | 1300 | 1 | 5.35E-06 | 1.01  | 12  | 0.923076923 |                       |                      |
| DMR14:42938601  | 14 | 42938601  | 300  | 1 | 9.24E-06 | 0.99  | 5   | 1.666666667 | Limch1                | Cytoskeleton         |
| DMR14:48647501  | 14 | 48647501  | 200  | 1 | 7.69E-06 | 0.81  | 2   | 1           | Dthd1                 |                      |
| DMR14:51871401  | 14 | 51871401  | 300  | 1 | 1.34E-07 | 1.43  | 0   | 0           | RF00026               |                      |
| DMR14:53424201  | 14 | 53424201  | 300  | 1 | 4.55E-06 | -0.51 | 6   | 2           |                       |                      |
| DMR14:67685001  | 14 | 67685001  | 600  | 1 | 5.81E-06 | 0.68  | 4   | 0.666666667 |                       |                      |
| DMR14:88037201  | 14 | 88037201  | 1200 | 1 | 9.24E-07 | 0.86  | 7   | 0.583333333 |                       |                      |
| DMR15:9508101   | 15 | 9508101   | 100  | 1 | 7.48E-06 | -2.03 | 2   | 2           |                       |                      |
| DMR15:15245601  | 15 | 15245601  | 1200 | 1 | 3.76E-06 | 1.14  | 4   | 0.333333333 |                       |                      |
| DMR15:40093101  | 15 | 40093101  | 1700 | 1 | 4.44E-07 | -2.34 | 32  | 1.882352941 | Atp8a2                | Transport            |
| DMR15:82217301  | 15 | 82217301  | 1200 | 1 | 8.41E-06 | -1.51 | 10  | 0.833333333 | Dach1                 | Transcription        |
| DMR15:82887301  | 15 | 82887301  | 200  | 1 | 1.46E-06 | 2.3   | 0   | 0           |                       |                      |
| DMR15:91000601  | 15 | 91000601  | 2400 | 1 | 5.57E-06 | -0.84 | 47  | 1.958333333 | Mycbp2                | Metabolism           |
| DMR15:106514501 | 15 | 106514501 | 2100 | 1 | 5.63E-06 | 3.68  | 57  | 2.714285714 | Farp1                 | Signaling            |
| DMR15:108973801 | 15 | 108973801 | 300  | 1 | 7.70E-06 | 1.26  | 13  | 4.333333333 | Pcca;AC123185.4       | Metabolism           |
| DMR16:13859401  | 16 | 13859401  | 1100 | 1 | 5.56E-06 | 1.95  | 6   | 0.545454545 |                       |                      |
| DMR16:29666201  | 16 | 29666201  | 200  | 1 | 8.63E-06 | 1.69  | 0   | 0           | Anxa10                | Binding Protein      |
| DMR16:51604801  | 16 | 51604801  | 200  | 1 | 9.62E-06 | -1.46 | 2   | 1           |                       |                      |
| DMR17:11804901  | 17 | 11804901  | 1400 | 1 | 5.69E-07 | -0.34 | 13  | 0.928571429 |                       |                      |
| DMR17:30211401  | 17 | 30211401  | 300  | 1 | 4.11E-07 | -1.44 | 9   | 3           |                       |                      |
| DMR17:35829401  | 17 | 35829401  | 400  | 1 | 9.60E-06 | 0.85  | 1   | 0.25        |                       |                      |
| DMR17:58741501  | 17 | 58741501  | 300  | 1 | 2.29E-06 | 1.45  | 0   | 0           |                       |                      |
| DMR17:75765701  | 17 | 75765701  | 300  | 1 | 3.91E-06 | 1.38  | 2   | 0.666666667 | Usp6nl                | Signaling            |
| DMR17:83786301  | 17 | 83786301  | 300  | 1 | 4.33E-06 | 1     | 1   | 0.333333333 |                       |                      |
| DMR17:84756501  | 17 | 84756501  | 1000 | 1 | 2.43E-07 | 1.9   | 17  | 1.7         |                       |                      |
| DMR18:16701701  | 18 | 16701701  | 800  | 1 | 2.63E-06 | 0.78  | 15  | 1.875       | Fhod3;RF00100         | Cytoskeleton         |
| DMR18:37712401  | 18 | 37712401  | 700  | 1 | 3.18E-06 | 2.48  | 3   | 0.428571429 | Stk32a;Dpysl3         | Signaling;Metabolism |
| DMR18:41663001  | 18 | 41663001  | 200  | 1 | 2.85E-06 | -1.84 | 2   | 1           |                       |                      |
| DMR18:71487001  | 18 | 71487001  | 300  | 1 | 2.02E-06 | 1.06  | 3   | 1           | Ctif                  |                      |
| DMR19:5811801   | 19 | 5811801   | 400  | 1 | 9.08E-06 | -1.99 | 1   | 0.25        |                       |                      |
| DMR19:6400801   | 19 | 6400801   | 300  | 1 | 1.78E-06 | -0.99 | 2   | 0.666666667 | Cdh8                  | Extracellular Matrix |
| DMR19:52315101  | 19 | 52315101  | 700  | 1 | 8.80E-06 | 1.24  | 12  | 1.714285714 | Wfdc1                 | Growth factor        |
| DMR20:45545801  | 20 | 45545801  | 200  | 1 | 7.93E-06 | -1.68 | 1   | 0.5         | Cdk19                 | Signaling            |

|                |    |           |      |   |          |      |    |             |                 |             |
|----------------|----|-----------|------|---|----------|------|----|-------------|-----------------|-------------|
| DMR20:47219801 | 20 | 47219801  | 2300 | 1 | 6.56E-07 | 1.43 | 35 | 1.52173913  | Snx3            |             |
| DMRX:33678101  | X  | 33678101  | 200  | 1 | 8.57E-06 | 1.71 | 7  | 3.5         | RF00407;RF00598 |             |
| DMRX:48275401  | X  | 48275401  | 1100 | 1 | 7.42E-06 | 1.15 | 13 | 1.181818182 |                 |             |
| DMRX:51137601  | X  | 51137601  | 300  | 1 | 4.21E-06 | 1.13 | 3  | 1           |                 |             |
| DMRX:53194501  | X  | 53194501  | 300  | 1 | 5.17E-06 | 1.55 | 2  | 0.666666667 | Dmd             | Development |
| DMRX:59538101  | X  | 59538101  | 1000 | 1 | 5.17E-06 | 1.63 | 2  | 0.2         |                 |             |
| DMRX:88234801  | X  | 88234801  | 200  | 1 | 8.32E-06 | 1.96 | 1  | 0.5         |                 |             |
| DMRX:103960701 | X  | 103960701 | 700  | 1 | 1.36E-07 | 1.47 | 12 | 1.714285714 |                 |             |
| DMRX:112965901 | X  | 112965901 | 700  | 1 | 6.24E-06 | 1.63 | 4  | 0.571428571 | Col4a5          |             |
