# Supplementary material for: Vinclozolin induced epigenetic transgenerational inheritance of pathologies and sperm epimutation biomarkers for specific diseases
Source: PubMed Central journal article supplement (PMC6114855; doi:10.1371/journal.pone.0202662), 2018-08-29
Supplement: pone.0202662.s008.pdf [file pone.0202662.s008.pdf]

**Supplemental Table S7**  
**Multiple Diseases DMR Signature List**

| DMR Name       | Chr | Start     | Length | # Sig Win | minP     | Log Fold Change | CpG # | CpG Density | Gene Annotation      | Gene Category   |
|----------------|-----|-----------|--------|-----------|----------|-----------------|-------|-------------|----------------------|-----------------|
| DMR1:34771501  | 1   | 34771501  | 400    | 1         | 7.48E-06 | -1.68           | 4     | 1           |                      |                 |
| DMR1:60694901  | 1   | 60694901  | 3200   | 1         | 4.36E-06 | -0.85           | 27    | 0.84375     |                      |                 |
| DMR1:65169901  | 1   | 65169901  | 1500   | 1         | 8.76E-06 | -1.47           | 3     | 0.2         | Vom2r80              | Receptor        |
| DMR1:71095901  | 1   | 71095901  | 1700   | 1         | 2.29E-06 | -1.8            | 11    | 0.647058824 |                      |                 |
| DMR1:84980301  | 1   | 84980301  | 1100   | 1         | 1.51E-06 | -1.3            | 9     | 0.818181818 | Psmc4                | Proteolysis     |
| DMR1:103226201 | 1   | 103226201 | 300    | 1         | 9.17E-06 | -1.6            | 3     | 1           | Ptpn5                | Signaling       |
| DMR1:109170001 | 1   | 109170001 | 500    | 1         | 7.25E-06 | -1.26           | 21    | 4.2         |                      |                 |
| DMR1:146048201 | 1   | 146048201 | 1200   | 1         | 2.04E-06 | 1.23            | 9     | 0.75        | Mesd                 |                 |
| DMR1:213704801 | 1   | 213704801 | 2200   | 1         | 7.16E-06 | -1.09           | 27    | 1.227272727 |                      |                 |
| DMR1:217156201 | 1   | 217156201 | 200    | 1         | 3.74E-06 | 1.63            | 2     | 1           | Shank2;AABR07006076. |                 |
| DMR1:233819601 | 1   | 233819601 | 200    | 1         | 3.87E-08 | -1.45           | 3     | 1.5         |                      |                 |
| DMR1:249886501 | 1   | 249886501 | 200    | 1         | 3.61E-06 | -1.66           | 3     | 1.5         |                      |                 |
| DMR1:261855401 | 1   | 261855401 | 1300   | 1         | 9.35E-06 | 1.24            | 30    | 2.307692308 | Loxl4                | Receptor        |
| DMR1:274688901 | 1   | 274688901 | 900    | 1         | 6.40E-06 | -1.48           | 4     | 0.444444444 | Shoc2                | Signaling       |
| DMR2:7489201   | 2   | 7489201   | 1600   | 1         | 1.20E-06 | 1.38            | 18    | 1.125       |                      |                 |
| DMR2:80049101  | 2   | 80049101  | 1200   | 1         | 8.12E-06 | -1.32           | 14    | 1.166666667 |                      |                 |
| DMR2:86852601  | 2   | 86852601  | 1500   | 1         | 4.41E-06 | -1.36           | 5     | 0.333333333 |                      |                 |
| DMR2:91240201  | 2   | 91240201  | 600    | 1         | 4.51E-06 | -1.63           | 6     | 1           |                      |                 |
| DMR2:96152901  | 2   | 96152901  | 100    | 1         | 3.93E-06 | -1.84           | 1     | 1           |                      |                 |
| DMR2:101997401 | 2   | 101997401 | 200    | 1         | 8.40E-06 | -1.16           | 3     | 1.5         |                      |                 |
| DMR2:186473201 | 2   | 186473201 | 1100   | 1         | 9.92E-06 | -1.22           | 18    | 1.636363636 | Kirrel1              |                 |
| DMR2:254932701 | 2   | 254932701 | 100    | 1         | 3.93E-06 | -1.84           | 2     | 2           |                      |                 |
| DMR3:4064701   | 3   | 4064701   | 2000   | 1         | 4.55E-06 | 1               | 41    | 2.05        | Agpat2               | Metabolism      |
| DMR3:23897801  | 3   | 23897801  | 200    | 1         | 1.08E-06 | 1.34            | 0     | 0           |                      |                 |
| DMR3:37871401  | 3   | 37871401  | 200    | 1         | 8.90E-06 | 1.15            | 2     | 1           | AABR07052125.1       |                 |
| DMR3:38273401  | 3   | 38273401  | 200    | 1         | 2.03E-06 | -1.26           | 7     | 3.5         | Stam2;AABR07052130.1 | Transport       |
| DMR3:49289201  | 3   | 49289201  | 200    | 1         | 9.28E-06 | -1.3            | 1     | 0.5         |                      |                 |
| DMR3:51696101  | 3   | 51696101  | 200    | 1         | 1.98E-06 | -1.3            | 1     | 0.5         | AABR07052405.1;Scn2a |                 |
| DMR3:61803101  | 3   | 61803101  | 1500   | 1         | 4.33E-06 | -1.13           | 5     | 0.333333333 | Mtx2                 | Binding Protein |
| DMR3:62471101  | 3   | 62471101  | 1100   | 1         | 8.31E-06 | -1.68           | 14    | 1.272727273 | AC109877.1;Hnrnpa3   | Translation     |
| DMR3:65055201  | 3   | 65055201  | 300    | 1         | 7.93E-06 | -0.82           | 4     | 1.333333333 |                      |                 |
| DMR3:79979601  | 3   | 79979601  | 200    | 1         | 3.90E-06 | 1.04            | 2     | 1           | Madd                 | Signaling       |
| DMR3:81556401  | 3   | 81556401  | 100    | 1         | 5.83E-07 | 2.59            | 0     | 0           |                      |                 |
| DMR3:93232401  | 3   | 93232401  | 800    | 1         | 7.92E-06 | 1.69            | 11    | 1.375       |                      |                 |
| DMR3:116456101 | 3   | 116456101 | 900    | 1         | 1.98E-06 | -1.69           | 14    | 1.555555556 |                      |                 |
| DMR3:142164001 | 3   | 142164001 | 300    | 1         | 1.98E-06 | 1.47            | 3     | 1           |                      |                 |
| DMR3:148059101 | 3   | 148059101 | 300    | 1         | 7.56E-06 | 1.09            | 4     | 1.333333333 | Defb24;AC111428.2    | Signaling       |
| DMR3:149518401 | 3   | 149518401 | 400    | 1         | 5.99E-06 | -1.41           | 2     | 0.5         | Bpifa2f              |                 |
| DMR3:153947101 | 3   | 153947101 | 300    | 1         | 2.99E-06 | 2.01            | 4     | 1.333333333 | LOC100911217         |                 |
| DMR3:163433701 | 3   | 163433701 | 1400   | 1         | 6.81E-06 | 1.34            | 22    | 1.571428571 | Prex1                |                 |
| DMR3:166129901 | 3   | 166129901 | 200    | 1         | 4.22E-06 | 1.57            | 3     | 1.5         |                      |                 |
| DMR4:50554801  | 4   | 50554801  | 200    | 1         | 3.15E-07 | -1.87           | 1     | 0.5         | Cadps2               | Metabolism      |
| DMR4:60639001  | 4   | 60639001  | 300    | 1         | 1.25E-06 | -1.15           | 4     | 1.333333333 | Exoc4                | Transport       |
| DMR4:88161601  | 4   | 88161601  | 500    | 1         | 9.02E-06 | -0.51           | 9     | 1.8         |                      |                 |
| DMR4:91503901  | 4   | 91503901  | 500    | 1         | 1.67E-07 | -1.9            | 6     | 1.2         | Ccser1               |                 |
| DMR4:91722401  | 4   | 91722401  | 200    | 1         | 5.00E-06 | -1.55           | 2     | 1           | Ccser1               |                 |
| DMR4:102359001 | 4   | 102359001 | 200    | 1         | 3.93E-06 | -1.84           | 1     | 0.5         | AABR07060994.1       |                 |
| DMR4:124370001 | 4   | 124370001 | 1400   | 1         | 8.81E-06 | -1.56           | 16    | 1.142857143 |                      |                 |
| DMR4:132891201 | 4   | 132891201 | 2200   | 1         | 1.44E-06 | 1.29            | 27    | 1.227272727 |                      |                 |
| DMR4:134881101 | 4   | 134881101 | 1000   | 1         | 8.96E-06 | -1.68           | 7     | 0.7         | Cntn3                | Cytoskeleton    |
| DMR4:146418001 | 4   | 146418001 | 100    | 1         | 7.20E-06 | -1.74           | 0     | 0           |                      |                 |
| DMR4:154364601 | 4   | 154364601 | 1100   | 1         | 7.59E-06 | 1.05            | 14    | 1.272727273 | LOC100911545         | Immune response |
| DMR4:155195601 | 4   | 155195601 | 200    | 1         | 1.22E-06 | 2.39            | 0     | 0           |                      |                 |
| DMR4:159624101 | 4   | 159624101 | 500    | 1         | 1.11E-06 | 1.43            | 3     | 0.6         | Fgf23                | Signaling       |
| DMR4:167864901 | 4   | 167864901 | 3300   | 1         | 7.78E-06 | -1.69           | 64    | 1.939393939 | Etv6                 | Transcription   |
| DMR5:1909301   | 5   | 1909301   | 1200   | 1         | 2.08E-06 | -2.11           | 9     | 0.75        |                      |                 |
| DMR5:6461001   | 5   | 6461001   | 1500   | 1         | 2.39E-07 | -2.01           | 20    | 1.333333333 |                      |                 |
| DMR5:25958101  | 5   | 25958101  | 300    | 1         | 2.07E-07 | -1.1            | 8     | 2.666666667 |                      |                 |

|                |    |           |      |   |          |       |    |             |                                                 |                 |
|----------------|----|-----------|------|---|----------|-------|----|-------------|-------------------------------------------------|-----------------|
| DMR5:48247701  | 5  | 48247701  | 1200 | 1 | 1.90E-06 | -1.42 | 28 | 2.333333333 | Rragd                                           | Signaling       |
| DMR5:51854001  | 5  | 51854001  | 200  | 1 | 4.84E-06 | 1.29  | 0  | 0           |                                                 |                 |
| DMR5:66422701  | 5  | 66422701  | 200  | 2 | 3.28E-06 | 2.1   | 1  | 0.5         |                                                 |                 |
| DMR5:100690401 | 5  | 100690401 | 500  | 1 | 2.61E-06 | -1.61 | 4  | 0.8         |                                                 |                 |
| DMR5:105041901 | 5  | 105041901 | 400  | 1 | 4.35E-06 | -1.69 | 4  | 1           |                                                 |                 |
| DMR5:107726001 | 5  | 107726001 | 300  | 1 | 2.99E-06 | -1.05 | 7  | 2.333333333 | Mtap                                            |                 |
| DMR5:122381001 | 5  | 122381001 | 1500 | 1 | 8.74E-06 | 2.08  | 18 | 1.2         | Sgip1                                           |                 |
| DMR5:149515901 | 5  | 149515901 | 100  | 1 | 6.70E-06 | -1.91 | 2  | 2           |                                                 |                 |
| DMR5:173548001 | 5  | 173548001 | 600  | 1 | 8.12E-06 | -1.32 | 8  | 1.333333333 | RGD1311517                                      |                 |
| DMR6:11815201  | 6  | 11815201  | 300  | 1 | 2.89E-06 | 1.27  | 3  | 1           |                                                 |                 |
| DMR6:24283601  | 6  | 24283601  | 200  | 1 | 9.99E-06 | -1.43 | 4  | 2           | AABR07063250.1                                  |                 |
| DMR6:24667401  | 6  | 24667401  | 2400 | 1 | 9.97E-06 | -1.5  | 28 | 1.166666667 | Capn13                                          | Protease        |
| DMR6:42059501  | 6  | 42059501  | 300  | 1 | 2.84E-06 | -1.33 | 5  | 1.666666667 |                                                 |                 |
| DMR6:52647401  | 6  | 52647401  | 900  | 1 | 1.08E-07 | 2.85  | 29 | 3.222222222 | Atxn7l1                                         | Development     |
| DMR6:60810901  | 6  | 60810901  | 200  | 1 | 4.30E-06 | -1.6  | 3  | 1.5         |                                                 |                 |
| DMR6:63512101  | 6  | 63512101  | 2200 | 1 | 9.79E-07 | -1.52 | 23 | 1.045454545 | RF00026                                         |                 |
| DMR6:66809001  | 6  | 66809001  | 100  | 1 | 4.48E-06 | 3.38  | 0  | 0           |                                                 |                 |
| DMR6:107610401 | 6  | 107610401 | 200  | 1 | 3.83E-07 | 1.28  | 2  | 1           | Dnal1                                           | Cytoskeleton    |
| DMR6:115563801 | 6  | 115563801 | 200  | 1 | 3.46E-06 | 1.32  | 2  | 1           | Sel1l                                           | Signaling       |
| DMR6:133902201 | 6  | 133902201 | 300  | 1 | 1.62E-06 | -1.61 | 9  | 3           | Mir541;Mir3581;Mir412;<br>Mir3578;Mir410;Mir307 |                 |
| DMR6:136004401 | 6  | 136004401 | 100  | 1 | 2.75E-06 | -1.25 | 5  | 5           | AABR07065593.1;Eif5;R<br>F00400                 | Transcription   |
| DMR7:2848801   | 7  | 2848801   | 700  | 1 | 9.51E-06 | -1.23 | 27 | 3.857142857 | Rnf41                                           |                 |
| DMR7:3366301   | 7  | 3366301   | 300  | 1 | 8.12E-06 | -1.26 | 12 | 4           | Itga7                                           | Signaling       |
| DMR7:10726601  | 7  | 10726601  | 700  | 1 | 7.04E-06 | -1.29 | 3  | 0.428571429 |                                                 |                 |
| DMR7:12343701  | 7  | 12343701  | 500  | 1 | 3.43E-06 | -1.33 | 11 | 2.2         | Mum1                                            | Transcription   |
| DMR7:34116701  | 7  | 34116701  | 1100 | 1 | 8.06E-06 | 0.72  | 29 | 2.636363636 | Elk3                                            | Transcription   |
| DMR7:51597201  | 7  | 51597201  | 400  | 1 | 1.87E-06 | -1.2  | 3  | 0.75        |                                                 |                 |
| DMR7:51967301  | 7  | 51967301  | 2300 | 1 | 2.76E-06 | -0.77 | 20 | 0.869565217 |                                                 |                 |
| DMR7:68086101  | 7  | 68086101  | 1000 | 1 | 2.26E-06 | -1.64 | 1  | 0.1         |                                                 |                 |
| DMR7:69279901  | 7  | 69279901  | 1400 | 1 | 1.12E-06 | -1.38 | 17 | 1.214285714 |                                                 |                 |
| DMR7:77662301  | 7  | 77662301  | 1300 | 1 | 5.84E-06 | -1.35 | 7  | 0.538461538 | RF00001                                         |                 |
| DMR7:87975401  | 7  | 87975401  | 400  | 2 | 1.25E-06 | 3.12  | 5  | 1.25        | AABR07057765.1                                  |                 |
| DMR7:115227401 | 7  | 115227401 | 200  | 1 | 8.13E-06 | -1.18 | 1  | 0.5         |                                                 |                 |
| DMR7:124880201 | 7  | 124880201 | 1300 | 1 | 7.87E-06 | 0.74  | 16 | 1.230769231 | Efcab6                                          | Signaling       |
| DMR7:136139201 | 7  | 136139201 | 600  | 1 | 7.37E-06 | -1.43 | 17 | 2.833333333 |                                                 |                 |
| DMR7:141274601 | 7  | 141274601 | 1100 | 1 | 1.26E-06 | -1.36 | 26 | 2.363636364 | Racgap1                                         | Binding Protein |
| DMR8:4018001   | 8  | 4018001   | 300  | 1 | 8.90E-06 | 1.41  | 2  | 0.666666667 | Vom2r23                                         |                 |
| DMR8:30326401  | 8  | 30326401  | 1200 | 1 | 2.67E-06 | 2.23  | 8  | 0.666666667 |                                                 |                 |
| DMR8:31147901  | 8  | 31147901  | 200  | 1 | 5.92E-06 | 2.45  | 0  | 0           |                                                 |                 |
| DMR8:52024701  | 8  | 52024701  | 1200 | 1 | 9.97E-06 | -1.5  | 11 | 0.916666667 |                                                 |                 |
| DMR8:70311701  | 8  | 70311701  | 300  | 1 | 4.36E-06 | -1.26 | 3  | 1           | Dennd4a                                         |                 |
| DMR8:114180801 | 8  | 114180801 | 300  | 1 | 2.64E-06 | -1.14 | 8  | 2.666666667 | LOC102552009;LOC1025<br>52166                   |                 |
| DMR8:119164201 | 8  | 119164201 | 400  | 1 | 2.93E-06 | 0.7   | 0  | 0           | Tmie;Als2cl                                     |                 |
| DMR8:127940901 | 8  | 127940901 | 1300 | 1 | 9.97E-06 | -1.98 | 12 | 0.923076923 | Oxsr1                                           | Signaling       |
| DMR9:18700601  | 9  | 18700601  | 300  | 1 | 3.68E-06 | 1.88  | 3  | 1           | Runx2                                           | Transcription   |
| DMR9:19408201  | 9  | 19408201  | 300  | 1 | 6.33E-06 | -0.81 | 6  | 2           |                                                 |                 |
| DMR9:32238601  | 9  | 32238601  | 2000 | 1 | 8.34E-06 | -1.39 | 11 | 0.55        |                                                 |                 |
| DMR9:41923401  | 9  | 41923401  | 200  | 1 | 3.23E-06 | -1.33 | 4  | 2           |                                                 |                 |
| DMR9:58221501  | 9  | 58221501  | 200  | 1 | 9.10E-07 | -1.02 | 1  | 0.5         |                                                 |                 |
| DMR9:62162401  | 9  | 62162401  | 800  | 1 | 3.25E-06 | -1.8  | 17 | 2.125       |                                                 |                 |
| DMR9:78715201  | 9  | 78715201  | 2100 | 1 | 2.41E-07 | -0.74 | 12 | 0.571428571 |                                                 |                 |
| DMR9:91680501  | 9  | 91680501  | 100  | 1 | 4.29E-06 | -1.73 | 0  | 0           | Pid1                                            | Signaling       |
| DMR9:110373801 | 9  | 110373801 | 300  | 1 | 3.90E-07 | -0.9  | 3  | 1           |                                                 |                 |
| DMR10:31415501 | 10 | 31415501  | 300  | 1 | 5.70E-06 | 2.98  | 5  | 1.666666667 | Cyfp2                                           | Development     |
| DMR10:44409201 | 10 | 44409201  | 200  | 1 | 3.93E-06 | -1.84 | 0  | 0           | Olr1437                                         | Receptor        |
| DMR10:51189801 | 10 | 51189801  | 200  | 1 | 7.25E-06 | 1.4   | 1  | 0.5         |                                                 |                 |
| DMR10:81617801 | 10 | 81617801  | 300  | 1 | 6.47E-06 | 4.12  | 0  | 0           | Mbtd1                                           | Transcription   |
| DMR11:20313601 | 11 | 20313601  | 1100 | 1 | 1.63E-06 | 1.42  | 7  | 0.636363636 |                                                 |                 |

|                 |    |           |      |   |          |       |    |             |                               |                         |
|-----------------|----|-----------|------|---|----------|-------|----|-------------|-------------------------------|-------------------------|
| DMR11:46737901  | 11 | 46737901  | 300  | 1 | 2.84E-06 | -1.67 | 2  | 0.666666667 | Tmem45a1;AABR070339           |                         |
| DMR11:48296201  | 11 | 48296201  | 100  | 1 | 4.30E-07 | 3.602 | 0  | 0           |                               |                         |
| DMR11:49442501  | 11 | 49442501  | 300  | 1 | 6.30E-06 | 1.09  | 1  | 0.333333333 |                               |                         |
| DMR12:31501     | 12 | 31501     | 200  | 1 | 8.49E-07 | -1.33 | 8  | 4           |                               |                         |
| DMR12:1756401   | 12 | 1756401   | 800  | 1 | 8.45E-06 | 2.09  | 15 | 1.875       | Insr                          | Receptor                |
| DMR12:8885801   | 12 | 8885801   | 300  | 1 | 1.60E-06 | 1.86  | 8  | 2.666666667 |                               |                         |
| DMR12:11146001  | 12 | 11146001  | 2300 | 1 | 9.17E-06 | 0.57  | 17 | 0.739130435 | Zfp655;Zkscan5                | Transcription           |
| DMR12:14506901  | 12 | 14506901  | 600  | 1 | 1.22E-06 | 2.82  | 4  | 0.666666667 | AABR07035437.1                |                         |
| DMR12:16362701  | 12 | 16362701  | 200  | 1 | 8.83E-06 | -1.1  | 4  | 2           | Snx8                          | Signaling               |
| DMR13:24299101  | 13 | 24299101  | 900  | 1 | 8.22E-06 | 1.7   | 7  | 0.777777778 |                               |                         |
| DMR13:39166701  | 13 | 39166701  | 700  | 1 | 8.04E-06 | -1.89 | 3  | 0.428571429 |                               |                         |
| DMR13:50169801  | 13 | 50169801  | 300  | 1 | 8.68E-06 | -1.56 | 3  | 1           | Lax1                          |                         |
| DMR13:87863701  | 13 | 87863701  | 800  | 1 | 5.97E-06 | -0.86 | 6  | 0.75        |                               |                         |
| DMR13:89494501  | 13 | 89494501  | 1200 | 1 | 8.98E-06 | -1.01 | 25 | 2.083333333 | Cfap126;Sdhc                  |                         |
| DMR13:109752501 | 13 | 109752501 | 300  | 1 | 1.19E-06 | 1.33  | 3  | 1           |                               |                         |
| DMR14:16862901  | 14 | 16862901  | 700  | 1 | 6.35E-06 | -1.42 | 4  | 0.571428571 | Shroom3                       | Cytoskeleton            |
| DMR14:30911701  | 14 | 30911701  | 1400 | 1 | 8.34E-06 | -1.32 | 5  | 0.357142857 |                               |                         |
| DMR14:35522201  | 14 | 35522201  | 1900 | 1 | 2.91E-06 | 3.04  | 30 | 1.578947368 | Pdgfra                        | Growth factor           |
| DMR14:36027901  | 14 | 36027901  | 1300 | 1 | 5.28E-06 | -1.43 | 13 | 1           |                               |                         |
| DMR14:83632401  | 14 | 83632401  | 300  | 1 | 9.41E-06 | -0.98 | 8  | 2.666666667 | Limk2                         | Signaling               |
| DMR14:86964501  | 14 | 86964501  | 200  | 1 | 1.53E-06 | 1.41  | 3  | 1.5         | RF00015                       |                         |
| DMR14:113842801 | 14 | 113842801 | 300  | 1 | 8.72E-06 | -0.92 | 1  | 0.333333333 |                               |                         |
| DMR15:18396001  | 15 | 18396001  | 200  | 1 | 2.16E-06 | 1.45  | 1  | 0.5         | Fam107a                       |                         |
| DMR15:18774001  | 15 | 18774001  | 700  | 1 | 3.30E-07 | -1.33 | 12 | 1.714285714 | Flnb                          | Cytoskeleton            |
| DMR15:20066101  | 15 | 20066101  | 1200 | 1 | 1.25E-06 | 3.03  | 24 | 2           |                               |                         |
| DMR15:30134901  | 15 | 30134901  | 1100 | 1 | 5.55E-06 | 2.37  | 2  | 0.181818182 |                               |                         |
| DMR15:30786001  | 15 | 30786001  | 1200 | 1 | 7.24E-06 | -1.61 | 7  | 0.583333333 | AABR07017768.5;AABR07017768.6 |                         |
| DMR15:56262401  | 15 | 56262401  | 300  | 1 | 5.63E-06 | -1.22 | 0  | 0           |                               |                         |
| DMR15:61428501  | 15 | 61428501  | 2500 | 1 | 4.63E-06 | -0.93 | 39 | 1.56        |                               |                         |
| DMR15:88240001  | 15 | 88240001  | 300  | 1 | 4.25E-06 | -1.29 | 4  | 1.333333333 | Mycbp2                        | Metabolism              |
| DMR15:94720601  | 15 | 94720601  | 100  | 1 | 9.25E-06 | -1.65 | 4  | 4           |                               |                         |
| DMR15:105161501 | 15 | 105161501 | 1300 | 1 | 1.00E-06 | -1.28 | 32 | 2.461538462 | Hs6st3                        | Metabolism              |
| DMR16:20361201  | 16 | 20361201  | 600  | 1 | 3.06E-06 | 1.44  | 9  | 1.5         | Arrdc2;AABR07024875.1;ll12rb1 |                         |
| DMR16:28615301  | 16 | 28615301  | 300  | 1 | 1.38E-06 | -0.93 | 3  | 1           | Spock3                        | Signaling               |
| DMR16:52425201  | 16 | 52425201  | 400  | 1 | 5.84E-06 | 1.14  | 2  | 0.5         |                               |                         |
| DMR16:67750401  | 16 | 67750401  | 1200 | 1 | 1.45E-06 | -1.83 | 21 | 1.75        |                               |                         |
| DMR16:80495201  | 16 | 80495201  | 1400 | 1 | 2.61E-06 | -1.76 | 23 | 1.642857143 |                               |                         |
| DMR16:81133501  | 16 | 81133501  | 400  | 1 | 8.29E-06 | -1.28 | 4  | 1           | Tfdp1;Atp4b                   | Transcription;Transport |
| DMR17:513001    | 17 | 513001    | 400  | 1 | 5.05E-06 | -0.81 | 4  | 1           | Npepo                         | Proteolysis             |
| DMR17:6471601   | 17 | 6471601   | 1900 | 1 | 4.43E-06 | 3.01  | 27 | 1.421052632 | Slc28a3                       | Metabolism              |
| DMR17:19045601  | 17 | 19045601  | 1100 | 1 | 9.17E-06 | -1.54 | 10 | 0.909090909 | LOC102546683                  |                         |
| DMR17:27473001  | 17 | 27473001  | 600  | 1 | 8.19E-07 | 2     | 4  | 0.666666667 | Cage1                         |                         |
| DMR17:50255201  | 17 | 50255201  | 2100 | 1 | 2.08E-06 | -0.85 | 18 | 0.857142857 |                               |                         |
| DMR17:74170301  | 17 | 74170301  | 600  | 1 | 8.12E-06 | 0.86  | 6  | 1           |                               |                         |
| DMR18:3762101   | 18 | 3762101   | 1100 | 1 | 1.32E-06 | -1.1  | 24 | 2.181818182 | AABR07031193.1                |                         |
| DMR18:6091701   | 18 | 6091701   | 300  | 1 | 1.28E-06 | -0.97 | 1  | 0.333333333 | Ss18                          | Transcription           |
| DMR18:40104001  | 18 | 40104001  | 300  | 1 | 1.26E-06 | -1.41 | 3  | 1           | Trim36                        | Metabolism              |
| DMR18:49880901  | 18 | 49880901  | 300  | 1 | 1.35E-06 | -1.41 | 7  | 2.333333333 | Zfp608                        |                         |
| DMR18:85107201  | 18 | 85107201  | 300  | 1 | 2.19E-06 | -1.66 | 4  | 1.333333333 |                               |                         |
| DMR19:21842201  | 19 | 21842201  | 300  | 1 | 3.06E-06 | -1.24 | 6  | 2           |                               |                         |
| DMR19:38647901  | 19 | 38647901  | 200  | 1 | 9.93E-06 | 1.28  | 3  | 1.5         | LOC100360619                  |                         |
| DMR20:12220301  | 20 | 12220301  | 1100 | 1 | 8.90E-06 | -1.94 | 5  | 0.454545455 | Col18a1                       | Extracellular Matrix    |
| DMR20:17828801  | 20 | 17828801  | 300  | 1 | 2.08E-07 | -1.41 | 4  | 1.333333333 |                               |                         |
| DMR20:26654001  | 20 | 26654001  | 300  | 1 | 3.33E-06 | 0.92  | 3  | 1           |                               |                         |
| DMR20:39945301  | 20 | 39945301  | 300  | 1 | 2.11E-06 | 0.7   | 0  | 0           |                               |                         |
| DMR20:48263101  | 20 | 48263101  | 2200 | 1 | 8.47E-06 | -1.24 | 36 | 1.636363636 | Bend3                         |                         |
| DMRX:119142201  | X  | 119142201 | 300  | 1 | 4.10E-06 | 1.92  | 1  | 0.333333333 |                               |                         |
| DMRX:135671701  | X  | 135671701 | 500  | 1 | 2.26E-06 | -1.49 | 4  | 0.8         |                               |                         |
| DMRX:143053801  | X  | 143053801 | 300  | 1 | 9.20E-06 | -1.43 | 1  | 0.333333333 |                               |                         |
